# Supplementary material for: Pathway Based Analysis of Genes and Interactions Influencing Porcine Testis Samples from Boars with Divergent Androstenone Content in Back Fat
Source: PLoS One. 2014 Mar 10;9(3):e91077. doi: 10.1371/journal.pone.0091077 (PMC3948775; doi:10.1371/journal.pone.0091077)
Supplement: File S2 — Enriched network. Cytoscape (.xgmml) file containing network visualization of significant interactions in enriched pathways and each edge in this network holds attributes containing KEGG pathway identifiers and names of enriched pathways, generated using Cytoscape version 2.8.2. (XGMML) [file pone.0091077.s004.xgmml]

<?xml version="1.0" encoding="UTF-8" standalone="yes"?>
<graph label="enriched pathway interactions" xmlns:dc="http://purl.org/dc/elements/1.1/" xmlns:xlink="http://www.w3.org/1999/xlink" xmlns:rdf="http://www.w3.org/1999/02/22-rdf-syntax-ns#" xmlns:cy="http://www.cytoscape.org" xmlns="http://www.cs.rpi.edu/XGMML"  directed="1">
  <att name="documentVersion" value="1.1"/>
  <att name="networkMetadata">
    <rdf:RDF>
      <rdf:Description rdf:about="http://www.cytoscape.org/">
        <dc:type>Protein-Protein Interaction</dc:type>
        <dc:description>N/A</dc:description>
        <dc:identifier>N/A</dc:identifier>
        <dc:date>2013-09-09 13:31:32</dc:date>
        <dc:title>enriched pathway interactions</dc:title>
        <dc:source>http://www.cytoscape.org/</dc:source>
        <dc:format>Cytoscape-XGMML</dc:format>
      </rdf:Description>
    </rdf:RDF>
  </att>
  <att type="string" name="backgroundColor" value="#ffffff"/>
  <att type="real" name="GRAPH_VIEW_ZOOM" value="0.2709559087861669"/>
  <att type="real" name="GRAPH_VIEW_CENTER_X" value="1792.546322988317"/>
  <att type="real" name="GRAPH_VIEW_CENTER_Y" value="2839.080931871126"/>
  <att type="boolean" name="NODE_SIZE_LOCKED" value="true"/>
  <att type="string" name="__layoutAlgorithm" value="force-directed" cy:hidden="true"/>
  <node label="100518074" id="-718">
    <att type="string" name="canonicalName" value="100518074"/>
    <att type="list" name="cytoscape.alias.list">
      <att type="string" name="cytoscape.alias.list" value="100518074"/>
    </att>
    <att type="string" name="geneName" value="LOC100518074"/>
    <att type="string" name="id" value="100518074"/>
    <graphics type="ELLIPSE" h="40.0" w="40.0" x="2007.1334228515625" y="2268.16552734375" fill="#ccccff" width="1" outline="#666666" cy:nodeTransparency="1.0" cy:nodeLabelFont="SansSerif.bold-0-12" cy:nodeLabel="LOC100518074" cy:borderLineType="solid"/>
  </node>
  <node label="100152497" id="-717">
    <att type="string" name="canonicalName" value="100152497"/>
    <att type="list" name="cytoscape.alias.list">
      <att type="string" name="cytoscape.alias.list" value="100152497"/>
    </att>
    <att type="string" name="geneName" value="LOC100152497"/>
    <att type="string" name="id" value="100152497"/>
    <graphics type="ELLIPSE" h="40.0" w="40.0" x="2138.4541015625" y="2312.399658203125" fill="#ccccff" width="1" outline="#666666" cy:nodeTransparency="1.0" cy:nodeLabelFont="SansSerif.bold-0-12" cy:nodeLabel="LOC100152497" cy:borderLineType="solid"/>
  </node>
  <node label="397318" id="-716">
    <att type="string" name="canonicalName" value="397318"/>
    <att type="list" name="cytoscape.alias.list">
      <att type="string" name="cytoscape.alias.list" value="397318"/>
    </att>
    <att type="string" name="geneName" value="NFATC1"/>
    <att type="string" name="id" value="397318"/>
    <graphics type="ELLIPSE" h="40.0" w="40.0" x="1562.1177978515625" y="2741.94482421875" fill="#ccccff" width="1" outline="#666666" cy:nodeTransparency="1.0" cy:nodeLabelFont="SansSerif.bold-0-12" cy:nodeLabel="NFATC1" cy:borderLineType="solid"/>
  </node>
  <node label="100516584" id="-715">
    <att type="string" name="canonicalName" value="100516584"/>
    <att type="list" name="cytoscape.alias.list">
      <att type="string" name="cytoscape.alias.list" value="100516584"/>
    </att>
    <att type="string" name="geneName" value="LOC100516584"/>
    <att type="string" name="id" value="100516584"/>
    <graphics type="ELLIPSE" h="40.0" w="40.0" x="1694.1497802734375" y="2860.759765625" fill="#ccccff" width="1" outline="#666666" cy:nodeTransparency="1.0" cy:nodeLabelFont="SansSerif.bold-0-12" cy:nodeLabel="LOC100516584" cy:borderLineType="solid"/>
  </node>
  <node label="397241" id="-714">
    <att type="string" name="canonicalName" value="397241"/>
    <att type="list" name="cytoscape.alias.list">
      <att type="string" name="cytoscape.alias.list" value="397241"/>
    </att>
    <att type="string" name="geneName" value="PPP3CA"/>
    <att type="string" name="id" value="397241"/>
    <graphics type="ELLIPSE" h="40.0" w="40.0" x="1353.932373046875" y="2612.541748046875" fill="#ccccff" width="1" outline="#666666" cy:nodeTransparency="1.0" cy:nodeLabelFont="SansSerif.bold-0-12" cy:nodeLabel="PPP3CA" cy:borderLineType="solid"/>
  </node>
  <node label="100516056" id="-713">
    <att type="string" name="canonicalName" value="100516056"/>
    <att type="list" name="cytoscape.alias.list">
      <att type="string" name="cytoscape.alias.list" value="100516056"/>
    </att>
    <att type="string" name="geneName" value="LOC100516056"/>
    <att type="string" name="id" value="100516056"/>
    <graphics type="ELLIPSE" h="40.0" w="40.0" x="1661.308349609375" y="2744.136962890625" fill="#ccccff" width="1" outline="#666666" cy:nodeTransparency="1.0" cy:nodeLabelFont="SansSerif.bold-0-12" cy:nodeLabel="LOC100516056" cy:borderLineType="solid"/>
  </node>
  <node label="396603" id="-712">
    <att type="string" name="canonicalName" value="396603"/>
    <att type="list" name="cytoscape.alias.list">
      <att type="string" name="cytoscape.alias.list" value="396603"/>
    </att>
    <att type="string" name="geneName" value="PPP3CB"/>
    <att type="string" name="id" value="396603"/>
    <graphics type="ELLIPSE" h="40.0" w="40.0" x="1724.51953125" y="2802.415283203125" fill="#ccccff" width="1" outline="#666666" cy:nodeTransparency="1.0" cy:nodeLabelFont="SansSerif.bold-0-12" cy:nodeLabel="PPP3CB" cy:borderLineType="solid"/>
  </node>
  <node label="100627903" id="-711">
    <att type="string" name="canonicalName" value="100627903"/>
    <att type="list" name="cytoscape.alias.list">
      <att type="string" name="cytoscape.alias.list" value="100627903"/>
    </att>
    <att type="string" name="geneName" value="LOC100627903"/>
    <att type="string" name="id" value="100627903"/>
    <graphics type="ELLIPSE" h="40.0" w="40.0" x="1799.388916015625" y="2753.896728515625" fill="#ccccff" width="1" outline="#666666" cy:nodeTransparency="1.0" cy:nodeLabelFont="SansSerif.bold-0-12" cy:nodeLabel="LOC100627903" cy:borderLineType="solid"/>
  </node>
  <node label="100739450" id="-710">
    <att type="string" name="canonicalName" value="100739450"/>
    <att type="list" name="cytoscape.alias.list">
      <att type="string" name="cytoscape.alias.list" value="100739450"/>
    </att>
    <att type="string" name="geneName" value="NFATC3"/>
    <att type="string" name="id" value="100739450"/>
    <graphics type="ELLIPSE" h="40.0" w="40.0" x="1794.962890625" y="2881.26611328125" fill="#ccccff" width="1" outline="#666666" cy:nodeTransparency="1.0" cy:nodeLabelFont="SansSerif.bold-0-12" cy:nodeLabel="NFATC3" cy:borderLineType="solid"/>
  </node>
  <node label="100151931" id="-709">
    <att type="string" name="canonicalName" value="100151931"/>
    <att type="list" name="cytoscape.alias.list">
      <att type="string" name="cytoscape.alias.list" value="100151931"/>
    </att>
    <att type="string" name="geneName" value="VAV2"/>
    <att type="string" name="id" value="100151931"/>
    <graphics type="ELLIPSE" h="40.0" w="40.0" x="2280.496826171875" y="2585.888671875" fill="#ccccff" width="1" outline="#666666" cy:nodeTransparency="1.0" cy:nodeLabelFont="SansSerif.bold-0-12" cy:nodeLabel="VAV2" cy:borderLineType="solid"/>
  </node>
  <node label="100518663" id="-708">
    <att type="string" name="canonicalName" value="100518663"/>
    <att type="list" name="cytoscape.alias.list">
      <att type="string" name="cytoscape.alias.list" value="100518663"/>
    </att>
    <att type="string" name="geneName" value="PLCG2"/>
    <att type="string" name="id" value="100518663"/>
    <graphics type="ELLIPSE" h="40.0" w="40.0" x="2176.59814453125" y="2597.89501953125" fill="#ccccff" width="1" outline="#666666" cy:nodeTransparency="1.0" cy:nodeLabelFont="SansSerif.bold-0-12" cy:nodeLabel="PLCG2" cy:borderLineType="solid"/>
  </node>
  <node label="100514498" id="-707">
    <att type="string" name="canonicalName" value="100514498"/>
    <att type="list" name="cytoscape.alias.list">
      <att type="string" name="cytoscape.alias.list" value="100514498"/>
    </att>
    <att type="string" name="geneName" value="LOC100514498"/>
    <att type="string" name="id" value="100514498"/>
    <graphics type="ELLIPSE" h="40.0" w="40.0" x="2287.216552734375" y="2684.295166015625" fill="#ccccff" width="1" outline="#666666" cy:nodeTransparency="1.0" cy:nodeLabelFont="SansSerif.bold-0-12" cy:nodeLabel="LOC100514498" cy:borderLineType="solid"/>
  </node>
  <node label="100158082" id="-706">
    <att type="string" name="canonicalName" value="100158082"/>
    <att type="list" name="cytoscape.alias.list">
      <att type="string" name="cytoscape.alias.list" value="100158082"/>
    </att>
    <att type="string" name="geneName" value="PPP3CC"/>
    <att type="string" name="id" value="100158082"/>
    <graphics type="ELLIPSE" h="40.0" w="40.0" x="1975.1097412109375" y="2680.90966796875" fill="#ccccff" width="1" outline="#666666" cy:nodeTransparency="1.0" cy:nodeLabelFont="SansSerif.bold-0-12" cy:nodeLabel="PPP3CC" cy:borderLineType="solid"/>
  </node>
  <node label="100621371" id="-705">
    <att type="string" name="canonicalName" value="100621371"/>
    <att type="list" name="cytoscape.alias.list">
      <att type="string" name="cytoscape.alias.list" value="100621371"/>
    </att>
    <att type="string" name="geneName" value="LOC100621371"/>
    <att type="string" name="id" value="100621371"/>
    <graphics type="ELLIPSE" h="40.0" w="40.0" x="1657.197021484375" y="2801.654052734375" fill="#ccccff" width="1" outline="#666666" cy:nodeTransparency="1.0" cy:nodeLabelFont="SansSerif.bold-0-12" cy:nodeLabel="LOC100621371" cy:borderLineType="solid"/>
  </node>
  <node label="100134969" id="-704">
    <att type="string" name="canonicalName" value="100134969"/>
    <att type="list" name="cytoscape.alias.list">
      <att type="string" name="cytoscape.alias.list" value="100134969"/>
    </att>
    <att type="string" name="geneName" value="NFATC2"/>
    <att type="string" name="id" value="100134969"/>
    <graphics type="ELLIPSE" h="40.0" w="40.0" x="1696.5714111328125" y="2989.19482421875" fill="#ccccff" width="1" outline="#666666" cy:nodeTransparency="1.0" cy:nodeLabelFont="SansSerif.bold-0-12" cy:nodeLabel="NFATC2" cy:borderLineType="solid"/>
  </node>
  <node label="100157996" id="-703">
    <att type="string" name="canonicalName" value="100157996"/>
    <att type="list" name="cytoscape.alias.list">
      <att type="string" name="cytoscape.alias.list" value="100157996"/>
    </att>
    <att type="string" name="geneName" value="SLA-DOA"/>
    <att type="string" name="id" value="100157996"/>
    <graphics type="ELLIPSE" h="40.0" w="40.0" x="234.23126220703125" y="4952.59716796875" fill="#ccccff" width="1" outline="#666666" cy:nodeTransparency="1.0" cy:nodeLabelFont="SansSerif.bold-0-12" cy:nodeLabel="SLA-DOA" cy:borderLineType="solid"/>
  </node>
  <node label="100621559" id="-702">
    <att type="string" name="canonicalName" value="100621559"/>
    <att type="list" name="cytoscape.alias.list">
      <att type="string" name="cytoscape.alias.list" value="100621559"/>
    </att>
    <att type="string" name="geneName" value="LOC100621559"/>
    <att type="string" name="id" value="100621559"/>
    <graphics type="ELLIPSE" h="40.0" w="40.0" x="309.1038818359375" y="5023.755859375" fill="#ccccff" width="1" outline="#666666" cy:nodeTransparency="1.0" cy:nodeLabelFont="SansSerif.bold-0-12" cy:nodeLabel="LOC100621559" cy:borderLineType="solid"/>
  </node>
  <node label="100135040" id="-701">
    <att type="string" name="canonicalName" value="100135040"/>
    <att type="list" name="cytoscape.alias.list">
      <att type="string" name="cytoscape.alias.list" value="100135040"/>
    </att>
    <att type="string" name="geneName" value="SLA-DRA"/>
    <att type="string" name="id" value="100135040"/>
    <graphics type="ELLIPSE" h="40.0" w="40.0" x="41.80316162109375" y="4977.734375" fill="#ccccff" width="1" outline="#666666" cy:nodeTransparency="1.0" cy:nodeLabelFont="SansSerif.bold-0-12" cy:nodeLabel="SLA-DRA" cy:borderLineType="solid"/>
  </node>
  <node label="100620407" id="-700">
    <att type="string" name="canonicalName" value="100620407"/>
    <att type="list" name="cytoscape.alias.list">
      <att type="string" name="cytoscape.alias.list" value="100620407"/>
    </att>
    <att type="string" name="geneName" value="LOC100620407"/>
    <att type="string" name="id" value="100620407"/>
    <graphics type="ELLIPSE" h="40.0" w="40.0" x="133.39990234375" y="5071.94091796875" fill="#ccccff" width="1" outline="#666666" cy:nodeTransparency="1.0" cy:nodeLabelFont="SansSerif.bold-0-12" cy:nodeLabel="LOC100620407" cy:borderLineType="solid"/>
  </node>
  <node label="100037921" id="-699">
    <att type="string" name="canonicalName" value="100037921"/>
    <att type="list" name="cytoscape.alias.list">
      <att type="string" name="cytoscape.alias.list" value="100037921"/>
    </att>
    <att type="string" name="geneName" value="SLA-DQB1"/>
    <att type="string" name="id" value="100037921"/>
    <graphics type="ELLIPSE" h="40.0" w="40.0" x="280.718505859375" y="5121.23876953125" fill="#ccccff" width="1" outline="#666666" cy:nodeTransparency="1.0" cy:nodeLabelFont="SansSerif.bold-0-12" cy:nodeLabel="SLA-DQB1" cy:borderLineType="solid"/>
  </node>
  <node label="100153387" id="-698">
    <att type="string" name="canonicalName" value="100153387"/>
    <att type="list" name="cytoscape.alias.list">
      <att type="string" name="cytoscape.alias.list" value="100153387"/>
    </att>
    <att type="string" name="geneName" value="SLA-DQA1"/>
    <att type="string" name="id" value="100153387"/>
    <graphics type="ELLIPSE" h="40.0" w="40.0" x="110.79620361328125" y="4943.29736328125" fill="#ccccff" width="1" outline="#666666" cy:nodeTransparency="1.0" cy:nodeLabelFont="SansSerif.bold-0-12" cy:nodeLabel="SLA-DQA1" cy:borderLineType="solid"/>
  </node>
  <node label="100135050" id="-697">
    <att type="string" name="canonicalName" value="100135050"/>
    <att type="list" name="cytoscape.alias.list">
      <att type="string" name="cytoscape.alias.list" value="100135050"/>
    </att>
    <att type="string" name="geneName" value="SLA-DMB"/>
    <att type="string" name="id" value="100135050"/>
    <graphics type="ELLIPSE" h="40.0" w="40.0" x="139.10345458984375" y="5222.8642578125" fill="#ccccff" width="1" outline="#666666" cy:nodeTransparency="1.0" cy:nodeLabelFont="SansSerif.bold-0-12" cy:nodeLabel="SLA-DMB" cy:borderLineType="solid"/>
  </node>
  <node label="100126861" id="-696">
    <att type="string" name="canonicalName" value="100126861"/>
    <att type="list" name="cytoscape.alias.list">
      <att type="string" name="cytoscape.alias.list" value="100126861"/>
    </att>
    <att type="string" name="geneName" value="AKT1"/>
    <att type="string" name="id" value="100126861"/>
    <graphics type="ELLIPSE" h="40.0" w="40.0" x="2034.850830078125" y="2754.583984375" fill="#ccccff" width="1" outline="#666666" cy:nodeTransparency="1.0" cy:nodeLabelFont="SansSerif.bold-0-12" cy:nodeLabel="AKT1" cy:borderLineType="solid"/>
  </node>
  <node label="100623707" id="-695">
    <att type="string" name="canonicalName" value="100623707"/>
    <att type="list" name="cytoscape.alias.list">
      <att type="string" name="cytoscape.alias.list" value="100623707"/>
    </att>
    <att type="string" name="geneName" value="LOC100623707"/>
    <att type="string" name="id" value="100623707"/>
    <graphics type="ELLIPSE" h="40.0" w="40.0" x="2275.954833984375" y="2647.732177734375" fill="#ccccff" width="1" outline="#666666" cy:nodeTransparency="1.0" cy:nodeLabelFont="SansSerif.bold-0-12" cy:nodeLabel="LOC100623707" cy:borderLineType="solid"/>
  </node>
  <node label="100171389" id="-694">
    <att type="string" name="canonicalName" value="100171389"/>
    <att type="list" name="cytoscape.alias.list">
      <att type="string" name="cytoscape.alias.list" value="100171389"/>
    </att>
    <att type="string" name="geneName" value="PTPN6"/>
    <att type="string" name="id" value="100171389"/>
    <graphics type="ELLIPSE" h="40.0" w="40.0" x="1473.295166015625" y="3375.17578125" fill="#ccccff" width="1" outline="#666666" cy:nodeTransparency="1.0" cy:nodeLabelFont="SansSerif.bold-0-12" cy:nodeLabel="PTPN6" cy:borderLineType="solid"/>
  </node>
  <node label="100038011" id="-693">
    <att type="string" name="canonicalName" value="100038011"/>
    <att type="list" name="cytoscape.alias.list">
      <att type="string" name="cytoscape.alias.list" value="100038011"/>
    </att>
    <att type="string" name="geneName" value="CD72"/>
    <att type="string" name="id" value="100038011"/>
    <graphics type="ELLIPSE" h="40.0" w="40.0" x="1579.2857666015625" y="3450.73681640625" fill="#ccccff" width="1" outline="#666666" cy:nodeTransparency="1.0" cy:nodeLabelFont="SansSerif.bold-0-12" cy:nodeLabel="CD72" cy:borderLineType="solid"/>
  </node>
  <node label="100135037" id="-692">
    <att type="string" name="canonicalName" value="100135037"/>
    <att type="list" name="cytoscape.alias.list">
      <att type="string" name="cytoscape.alias.list" value="100135037"/>
    </att>
    <att type="string" name="geneName" value="SLA-6"/>
    <att type="string" name="id" value="100135037"/>
    <graphics type="ELLIPSE" h="40.0" w="40.0" x="232.71902465820312" y="5063.90478515625" fill="#ccccff" width="1" outline="#666666" cy:nodeTransparency="1.0" cy:nodeLabelFont="SansSerif.bold-0-12" cy:nodeLabel="SLA-6" cy:borderLineType="solid"/>
  </node>
  <node label="100135029" id="-691">
    <att type="string" name="canonicalName" value="100135029"/>
    <att type="list" name="cytoscape.alias.list">
      <att type="string" name="cytoscape.alias.list" value="100135029"/>
    </att>
    <att type="string" name="geneName" value="SLA-5"/>
    <att type="string" name="id" value="100135029"/>
    <graphics type="ELLIPSE" h="40.0" w="40.0" x="190.574951171875" y="4980.87841796875" fill="#ccccff" width="1" outline="#666666" cy:nodeTransparency="1.0" cy:nodeLabelFont="SansSerif.bold-0-12" cy:nodeLabel="SLA-5" cy:borderLineType="solid"/>
  </node>
  <node label="100037293" id="-690">
    <att type="string" name="canonicalName" value="100037293"/>
    <att type="list" name="cytoscape.alias.list">
      <att type="string" name="cytoscape.alias.list" value="100037293"/>
    </att>
    <att type="string" name="geneName" value="SLA-1"/>
    <att type="string" name="id" value="100037293"/>
    <graphics type="ELLIPSE" h="40.0" w="40.0" x="226.5628662109375" y="5132.56103515625" fill="#ccccff" width="1" outline="#666666" cy:nodeTransparency="1.0" cy:nodeLabelFont="SansSerif.bold-0-12" cy:nodeLabel="SLA-1" cy:borderLineType="solid"/>
  </node>
  <node label="100037288" id="-689">
    <att type="string" name="canonicalName" value="100037288"/>
    <att type="list" name="cytoscape.alias.list">
      <att type="string" name="cytoscape.alias.list" value="100037288"/>
    </att>
    <att type="string" name="geneName" value="SLA-3"/>
    <att type="string" name="id" value="100037288"/>
    <graphics type="ELLIPSE" h="40.0" w="40.0" x="0.0" y="5130.94140625" fill="#ccccff" width="1" outline="#666666" cy:nodeTransparency="1.0" cy:nodeLabelFont="SansSerif.bold-0-12" cy:nodeLabel="SLA-3" cy:borderLineType="solid"/>
  </node>
  <node label="100135031" id="-688">
    <att type="string" name="canonicalName" value="100135031"/>
    <att type="list" name="cytoscape.alias.list">
      <att type="string" name="cytoscape.alias.list" value="100135031"/>
    </att>
    <att type="string" name="geneName" value="SLA-2"/>
    <att type="string" name="id" value="100135031"/>
    <graphics type="ELLIPSE" h="40.0" w="40.0" x="17.16766357421875" y="5047.69775390625" fill="#ccccff" width="1" outline="#666666" cy:nodeTransparency="1.0" cy:nodeLabelFont="SansSerif.bold-0-12" cy:nodeLabel="SLA-2" cy:borderLineType="solid"/>
  </node>
  <node label="396650" id="-687">
    <att type="string" name="canonicalName" value="396650"/>
    <att type="list" name="cytoscape.alias.list">
      <att type="string" name="cytoscape.alias.list" value="396650"/>
    </att>
    <att type="string" name="geneName" value="SLA-7"/>
    <att type="string" name="id" value="396650"/>
    <graphics type="ELLIPSE" h="40.0" w="39.999996185302734" x="60.091875076293945" y="5153.13037109375" fill="#ccccff" width="1" outline="#666666" cy:nodeTransparency="1.0" cy:nodeLabelFont="SansSerif.bold-0-12" cy:nodeLabel="SLA-7" cy:borderLineType="solid"/>
  </node>
  <node label="396967" id="-686">
    <att type="string" name="canonicalName" value="396967"/>
    <att type="list" name="cytoscape.alias.list">
      <att type="string" name="cytoscape.alias.list" value="396967"/>
    </att>
    <att type="string" name="geneName" value="GOT1"/>
    <att type="string" name="id" value="396967"/>
    <graphics type="ELLIPSE" h="40.0" w="40.0" x="965.1661987304688" y="4486.8583984375" fill="#ccccff" width="1" outline="#666666" cy:nodeTransparency="1.0" cy:nodeLabelFont="SansSerif.bold-0-12" cy:nodeLabel="GOT1" cy:borderLineType="solid"/>
  </node>
  <node label="399538" id="-685">
    <att type="string" name="canonicalName" value="399538"/>
    <att type="list" name="cytoscape.alias.list">
      <att type="string" name="cytoscape.alias.list" value="399538"/>
    </att>
    <att type="string" name="geneName" value="PRDX6"/>
    <att type="string" name="id" value="399538"/>
    <graphics type="ELLIPSE" h="40.0" w="40.0" x="843.9563598632812" y="4572.748046875" fill="#ccccff" width="1" outline="#666666" cy:nodeTransparency="1.0" cy:nodeLabelFont="SansSerif.bold-0-12" cy:nodeLabel="PRDX6" cy:borderLineType="solid"/>
  </node>
  <node label="397443" id="-684">
    <att type="string" name="canonicalName" value="397443"/>
    <att type="list" name="cytoscape.alias.list">
      <att type="string" name="cytoscape.alias.list" value="397443"/>
    </att>
    <att type="string" name="geneName" value="HPD"/>
    <att type="string" name="id" value="397443"/>
    <graphics type="ELLIPSE" h="40.0" w="40.0" x="821.303955078125" y="4674.4970703125" fill="#ccccff" width="1" outline="#666666" cy:nodeTransparency="1.0" cy:nodeLabelFont="SansSerif.bold-0-12" cy:nodeLabel="HPD" cy:borderLineType="solid"/>
  </node>
  <node label="396968" id="-683">
    <att type="string" name="canonicalName" value="396968"/>
    <att type="list" name="cytoscape.alias.list">
      <att type="string" name="cytoscape.alias.list" value="396968"/>
    </att>
    <att type="string" name="geneName" value="GOT2"/>
    <att type="string" name="id" value="396968"/>
    <graphics type="ELLIPSE" h="40.0" w="40.0" x="764.6546020507812" y="4756.7548828125" fill="#ccccff" width="1" outline="#666666" cy:nodeTransparency="1.0" cy:nodeLabelFont="SansSerif.bold-0-12" cy:nodeLabel="GOT2" cy:borderLineType="solid"/>
  </node>
  <node label="396857" id="-682">
    <att type="string" name="canonicalName" value="396857"/>
    <att type="list" name="cytoscape.alias.list">
      <att type="string" name="cytoscape.alias.list" value="396857"/>
    </att>
    <att type="string" name="geneName" value="DDC"/>
    <att type="string" name="id" value="396857"/>
    <graphics type="ELLIPSE" h="40.0" w="40.0" x="703.353759765625" y="4646.6650390625" fill="#ccccff" width="1" outline="#666666" cy:nodeTransparency="1.0" cy:nodeLabelFont="SansSerif.bold-0-12" cy:nodeLabel="DDC" cy:borderLineType="solid"/>
  </node>
  <node label="100624971" id="-681">
    <att type="string" name="canonicalName" value="100624971"/>
    <att type="list" name="cytoscape.alias.list">
      <att type="string" name="cytoscape.alias.list" value="100624971"/>
    </att>
    <att type="string" name="geneName" value="PIAS4"/>
    <att type="string" name="id" value="100624971"/>
    <graphics type="ELLIPSE" h="40.0" w="40.0" x="619.5079956054688" y="6780.95166015625" fill="#ccccff" width="1" outline="#666666" cy:nodeTransparency="1.0" cy:nodeLabelFont="SansSerif.bold-0-12" cy:nodeLabel="PIAS4" cy:borderLineType="solid"/>
  </node>
  <node label="397261" id="-680">
    <att type="string" name="canonicalName" value="397261"/>
    <att type="list" name="cytoscape.alias.list">
      <att type="string" name="cytoscape.alias.list" value="397261"/>
    </att>
    <att type="string" name="geneName" value="STAT4"/>
    <att type="string" name="id" value="397261"/>
    <graphics type="ELLIPSE" h="40.0" w="40.0" x="616.8536987304688" y="6888.68359375" fill="#ccccff" width="1" outline="#666666" cy:nodeTransparency="1.0" cy:nodeLabelFont="SansSerif.bold-0-12" cy:nodeLabel="STAT4" cy:borderLineType="solid"/>
  </node>
  <node label="100156991" id="-679">
    <att type="string" name="canonicalName" value="100156991"/>
    <att type="list" name="cytoscape.alias.list">
      <att type="string" name="cytoscape.alias.list" value="100156991"/>
    </att>
    <att type="string" name="geneName" value="IL13RA2"/>
    <att type="string" name="id" value="100156991"/>
    <graphics type="ELLIPSE" h="40.0" w="40.0" x="1493.925048828125" y="3502.23876953125" fill="#ccccff" width="1" outline="#666666" cy:nodeTransparency="1.0" cy:nodeLabelFont="SansSerif.bold-0-12" cy:nodeLabel="IL13RA2" cy:borderLineType="solid"/>
  </node>
  <node label="100621690" id="-678">
    <att type="string" name="canonicalName" value="100621690"/>
    <att type="list" name="cytoscape.alias.list">
      <att type="string" name="cytoscape.alias.list" value="100621690"/>
    </att>
    <att type="string" name="geneName" value="CBLB"/>
    <att type="string" name="id" value="100621690"/>
    <graphics type="ELLIPSE" h="40.0" w="40.0" x="884.6417236328125" y="3261.95751953125" fill="#ccccff" width="1" outline="#666666" cy:nodeTransparency="1.0" cy:nodeLabelFont="SansSerif.bold-0-12" cy:nodeLabel="CBLB" cy:borderLineType="solid"/>
  </node>
  <node label="397451" id="-677">
    <att type="string" name="canonicalName" value="397451"/>
    <att type="list" name="cytoscape.alias.list">
      <att type="string" name="cytoscape.alias.list" value="397451"/>
    </att>
    <att type="string" name="geneName" value="LIFR"/>
    <att type="string" name="id" value="397451"/>
    <graphics type="ELLIPSE" h="40.0" w="40.0" x="1011.003662109375" y="3252.495361328125" fill="#ccccff" width="1" outline="#666666" cy:nodeTransparency="1.0" cy:nodeLabelFont="SansSerif.bold-0-12" cy:nodeLabel="LIFR" cy:borderLineType="solid"/>
  </node>
  <node label="100620875" id="-676">
    <att type="string" name="canonicalName" value="100620875"/>
    <att type="list" name="cytoscape.alias.list">
      <att type="string" name="cytoscape.alias.list" value="100620875"/>
    </att>
    <att type="string" name="geneName" value="LOC100620875"/>
    <att type="string" name="id" value="100620875"/>
    <graphics type="ELLIPSE" h="40.0" w="40.0" x="929.0303344726562" y="3150.06787109375" fill="#ccccff" width="1" outline="#666666" cy:nodeTransparency="1.0" cy:nodeLabelFont="SansSerif.bold-0-12" cy:nodeLabel="LOC100620875" cy:borderLineType="solid"/>
  </node>
  <node label="100514187" id="-675">
    <att type="string" name="canonicalName" value="100514187"/>
    <att type="list" name="cytoscape.alias.list">
      <att type="string" name="cytoscape.alias.list" value="100514187"/>
    </att>
    <att type="string" name="geneName" value="SOCS7"/>
    <att type="string" name="id" value="100514187"/>
    <graphics type="ELLIPSE" h="40.0" w="40.0" x="1272.85498046875" y="3023.61083984375" fill="#ccccff" width="1" outline="#666666" cy:nodeTransparency="1.0" cy:nodeLabelFont="SansSerif.bold-0-12" cy:nodeLabel="SOCS7" cy:borderLineType="solid"/>
  </node>
  <node label="733648" id="-674">
    <att type="string" name="canonicalName" value="733648"/>
    <att type="list" name="cytoscape.alias.list">
      <att type="string" name="cytoscape.alias.list" value="733648"/>
    </att>
    <att type="string" name="geneName" value="STAT3"/>
    <att type="string" name="id" value="733648"/>
    <graphics type="ELLIPSE" h="40.0" w="40.0" x="1212.9989013671875" y="2944.486083984375" fill="#ccccff" width="1" outline="#666666" cy:nodeTransparency="1.0" cy:nodeLabelFont="SansSerif.bold-0-12" cy:nodeLabel="STAT3" cy:borderLineType="solid"/>
  </node>
  <node label="100525654" id="-673">
    <att type="string" name="canonicalName" value="100525654"/>
    <att type="list" name="cytoscape.alias.list">
      <att type="string" name="cytoscape.alias.list" value="100525654"/>
    </att>
    <att type="string" name="geneName" value="IL10RA"/>
    <att type="string" name="id" value="100525654"/>
    <graphics type="ELLIPSE" h="40.0" w="40.0" x="1163.8880615234375" y="3068.88916015625" fill="#ccccff" width="1" outline="#666666" cy:nodeTransparency="1.0" cy:nodeLabelFont="SansSerif.bold-0-12" cy:nodeLabel="IL10RA" cy:borderLineType="solid"/>
  </node>
  <node label="100037294" id="-672">
    <att type="string" name="canonicalName" value="100037294"/>
    <att type="list" name="cytoscape.alias.list">
      <att type="string" name="cytoscape.alias.list" value="100037294"/>
    </att>
    <att type="string" name="geneName" value="IL6ST"/>
    <att type="string" name="id" value="100037294"/>
    <graphics type="ELLIPSE" h="40.0" w="40.0" x="1092.20068359375" y="3240.803955078125" fill="#ccccff" width="1" outline="#666666" cy:nodeTransparency="1.0" cy:nodeLabelFont="SansSerif.bold-0-12" cy:nodeLabel="IL6ST" cy:borderLineType="solid"/>
  </node>
  <node label="100302367" id="-671">
    <att type="string" name="canonicalName" value="100302367"/>
    <att type="list" name="cytoscape.alias.list">
      <att type="string" name="cytoscape.alias.list" value="100302367"/>
    </att>
    <att type="string" name="geneName" value="SOCS5"/>
    <att type="string" name="id" value="100302367"/>
    <graphics type="ELLIPSE" h="40.0" w="40.0" x="1071.119140625" y="3113.46826171875" fill="#ccccff" width="1" outline="#666666" cy:nodeTransparency="1.0" cy:nodeLabelFont="SansSerif.bold-0-12" cy:nodeLabel="SOCS5" cy:borderLineType="solid"/>
  </node>
  <node label="100524166" id="-670">
    <att type="string" name="canonicalName" value="100524166"/>
    <att type="list" name="cytoscape.alias.list">
      <att type="string" name="cytoscape.alias.list" value="100524166"/>
    </att>
    <att type="string" name="geneName" value="LOC100524166"/>
    <att type="string" name="id" value="100524166"/>
    <graphics type="ELLIPSE" h="40.0" w="40.0" x="1217.710205078125" y="3433.7919921875" fill="#ccccff" width="1" outline="#666666" cy:nodeTransparency="1.0" cy:nodeLabelFont="SansSerif.bold-0-12" cy:nodeLabel="LOC100524166" cy:borderLineType="solid"/>
  </node>
  <node label="397363" id="-669">
    <att type="string" name="canonicalName" value="397363"/>
    <att type="list" name="cytoscape.alias.list">
      <att type="string" name="cytoscape.alias.list" value="397363"/>
    </att>
    <att type="string" name="geneName" value="TYK2"/>
    <att type="string" name="id" value="397363"/>
    <graphics type="ELLIPSE" h="40.0" w="40.0" x="1102.78955078125" y="3356.628173828125" fill="#ccccff" width="1" outline="#666666" cy:nodeTransparency="1.0" cy:nodeLabelFont="SansSerif.bold-0-12" cy:nodeLabel="TYK2" cy:borderLineType="solid"/>
  </node>
  <node label="100156226" id="-668">
    <att type="string" name="canonicalName" value="100156226"/>
    <att type="list" name="cytoscape.alias.list">
      <att type="string" name="cytoscape.alias.list" value="100156226"/>
    </att>
    <att type="string" name="geneName" value="EP300"/>
    <att type="string" name="id" value="100156226"/>
    <graphics type="ELLIPSE" h="40.0" w="40.0" x="1487.394775390625" y="2711.78466796875" fill="#ccccff" width="1" outline="#666666" cy:nodeTransparency="1.0" cy:nodeLabelFont="SansSerif.bold-0-12" cy:nodeLabel="EP300" cy:borderLineType="solid"/>
  </node>
  <node label="397340" id="-667">
    <att type="string" name="canonicalName" value="397340"/>
    <att type="list" name="cytoscape.alias.list">
      <att type="string" name="cytoscape.alias.list" value="397340"/>
    </att>
    <att type="string" name="geneName" value="STAT5B"/>
    <att type="string" name="id" value="397340"/>
    <graphics type="ELLIPSE" h="40.0" w="40.0" x="1459.900146484375" y="2984.45263671875" fill="#ccccff" width="1" outline="#666666" cy:nodeTransparency="1.0" cy:nodeLabelFont="SansSerif.bold-0-12" cy:nodeLabel="STAT5B" cy:borderLineType="solid"/>
  </node>
  <node label="100157844" id="-666">
    <att type="string" name="canonicalName" value="100157844"/>
    <att type="list" name="cytoscape.alias.list">
      <att type="string" name="cytoscape.alias.list" value="100157844"/>
    </att>
    <att type="string" name="geneName" value="PIM1"/>
    <att type="string" name="id" value="100157844"/>
    <graphics type="ELLIPSE" h="40.0" w="40.0" x="1098.543701171875" y="2978.602783203125" fill="#ccccff" width="1" outline="#666666" cy:nodeTransparency="1.0" cy:nodeLabelFont="SansSerif.bold-0-12" cy:nodeLabel="PIM1" cy:borderLineType="solid"/>
  </node>
  <node label="780426" id="-665">
    <att type="string" name="canonicalName" value="780426"/>
    <att type="list" name="cytoscape.alias.list">
      <att type="string" name="cytoscape.alias.list" value="780426"/>
    </att>
    <att type="string" name="geneName" value="CCND3"/>
    <att type="string" name="id" value="780426"/>
    <graphics type="ELLIPSE" h="40.0" w="40.0" x="1330.8961181640625" y="2971.08203125" fill="#ccccff" width="1" outline="#666666" cy:nodeTransparency="1.0" cy:nodeLabelFont="SansSerif.bold-0-12" cy:nodeLabel="CCND3" cy:borderLineType="solid"/>
  </node>
  <node label="397201" id="-664">
    <att type="string" name="canonicalName" value="397201"/>
    <att type="list" name="cytoscape.alias.list">
      <att type="string" name="cytoscape.alias.list" value="397201"/>
    </att>
    <att type="string" name="geneName" value="JAK2"/>
    <att type="string" name="id" value="397201"/>
    <graphics type="ELLIPSE" h="40.0" w="40.0" x="1351.9541015625" y="3440.88818359375" fill="#ccccff" width="1" outline="#666666" cy:nodeTransparency="1.0" cy:nodeLabelFont="SansSerif.bold-0-12" cy:nodeLabel="JAK2" cy:borderLineType="solid"/>
  </node>
  <node label="100518649" id="-663">
    <att type="string" name="canonicalName" value="100518649"/>
    <att type="list" name="cytoscape.alias.list">
      <att type="string" name="cytoscape.alias.list" value="100518649"/>
    </att>
    <att type="string" name="geneName" value="JAK3"/>
    <att type="string" name="id" value="100518649"/>
    <graphics type="ELLIPSE" h="40.0" w="40.0" x="1467.8505859375" y="3192.525390625" fill="#ccccff" width="1" outline="#666666" cy:nodeTransparency="1.0" cy:nodeLabelFont="SansSerif.bold-0-12" cy:nodeLabel="JAK3" cy:borderLineType="solid"/>
  </node>
  <node label="100627682" id="-662">
    <att type="string" name="canonicalName" value="100627682"/>
    <att type="list" name="cytoscape.alias.list">
      <att type="string" name="cytoscape.alias.list" value="100627682"/>
    </att>
    <att type="string" name="geneName" value="LOC100627682"/>
    <att type="string" name="id" value="100627682"/>
    <graphics type="ELLIPSE" h="40.0" w="40.0" x="1314.534423828125" y="3176.771484375" fill="#ccccff" width="1" outline="#666666" cy:nodeTransparency="1.0" cy:nodeLabelFont="SansSerif.bold-0-12" cy:nodeLabel="LOC100627682" cy:borderLineType="solid"/>
  </node>
  <node label="100519005" id="-661">
    <att type="string" name="canonicalName" value="100519005"/>
    <att type="list" name="cytoscape.alias.list">
      <att type="string" name="cytoscape.alias.list" value="100519005"/>
    </att>
    <att type="string" name="geneName" value="PIAS1"/>
    <att type="string" name="id" value="100519005"/>
    <graphics type="ELLIPSE" h="40.0" w="40.0" x="1378.5662841796875" y="3064.26416015625" fill="#ccccff" width="1" outline="#666666" cy:nodeTransparency="1.0" cy:nodeLabelFont="SansSerif.bold-0-12" cy:nodeLabel="PIAS1" cy:borderLineType="solid"/>
  </node>
  <node label="100152238" id="-660">
    <att type="string" name="canonicalName" value="100152238"/>
    <att type="list" name="cytoscape.alias.list">
      <att type="string" name="cytoscape.alias.list" value="100152238"/>
    </att>
    <att type="string" name="geneName" value="IFNGR1"/>
    <att type="string" name="id" value="100152238"/>
    <graphics type="ELLIPSE" h="40.0" w="40.0" x="1226.8360595703125" y="3140.28955078125" fill="#ccccff" width="1" outline="#666666" cy:nodeTransparency="1.0" cy:nodeLabelFont="SansSerif.bold-0-12" cy:nodeLabel="IFNGR1" cy:borderLineType="solid"/>
  </node>
  <node label="396923" id="-659">
    <att type="string" name="canonicalName" value="396923"/>
    <att type="list" name="cytoscape.alias.list">
      <att type="string" name="cytoscape.alias.list" value="396923"/>
    </att>
    <att type="string" name="geneName" value="STAT2"/>
    <att type="string" name="id" value="396923"/>
    <graphics type="ELLIPSE" h="40.0" w="40.0" x="1383.203369140625" y="2904.2646484375" fill="#ccccff" width="1" outline="#666666" cy:nodeTransparency="1.0" cy:nodeLabelFont="SansSerif.bold-0-12" cy:nodeLabel="STAT2" cy:borderLineType="solid"/>
  </node>
  <node label="100302366" id="-658">
    <att type="string" name="canonicalName" value="100302366"/>
    <att type="list" name="cytoscape.alias.list">
      <att type="string" name="cytoscape.alias.list" value="100302366"/>
    </att>
    <att type="string" name="geneName" value="SOCS4"/>
    <att type="string" name="id" value="100302366"/>
    <graphics type="ELLIPSE" h="40.0" w="40.0" x="807.772705078125" y="3129.6484375" fill="#ccccff" width="1" outline="#666666" cy:nodeTransparency="1.0" cy:nodeLabelFont="SansSerif.bold-0-12" cy:nodeLabel="SOCS4" cy:borderLineType="solid"/>
  </node>
  <node label="100153518" id="-657">
    <att type="string" name="canonicalName" value="100153518"/>
    <att type="list" name="cytoscape.alias.list">
      <att type="string" name="cytoscape.alias.list" value="100153518"/>
    </att>
    <att type="string" name="geneName" value="STAT6"/>
    <att type="string" name="id" value="100153518"/>
    <graphics type="ELLIPSE" h="40.0" w="40.0" x="1387.705078125" y="3192.3759765625" fill="#ccccff" width="1" outline="#666666" cy:nodeTransparency="1.0" cy:nodeLabelFont="SansSerif.bold-0-12" cy:nodeLabel="STAT6" cy:borderLineType="solid"/>
  </node>
  <node label="397162" id="-656">
    <att type="string" name="canonicalName" value="397162"/>
    <att type="list" name="cytoscape.alias.list">
      <att type="string" name="cytoscape.alias.list" value="397162"/>
    </att>
    <att type="string" name="geneName" value="CCND2"/>
    <att type="string" name="id" value="397162"/>
    <graphics type="ELLIPSE" h="40.0" w="40.0" x="1445.5032958984375" y="2825.412841796875" fill="#ccccff" width="1" outline="#666666" cy:nodeTransparency="1.0" cy:nodeLabelFont="SansSerif.bold-0-12" cy:nodeLabel="CCND2" cy:borderLineType="solid"/>
  </node>
  <node label="733685" id="-655">
    <att type="string" name="canonicalName" value="733685"/>
    <att type="list" name="cytoscape.alias.list">
      <att type="string" name="cytoscape.alias.list" value="733685"/>
    </att>
    <att type="string" name="geneName" value="ALDH2"/>
    <att type="string" name="id" value="733685"/>
    <graphics type="ELLIPSE" h="40.0" w="40.0" x="492.51904296875" y="4509.826171875" fill="#ccccff" width="1" outline="#666666" cy:nodeTransparency="1.0" cy:nodeLabelFont="SansSerif.bold-0-12" cy:nodeLabel="ALDH2" cy:borderLineType="solid"/>
  </node>
  <node label="414909" id="-654">
    <att type="string" name="canonicalName" value="414909"/>
    <att type="list" name="cytoscape.alias.list">
      <att type="string" name="cytoscape.alias.list" value="414909"/>
    </att>
    <att type="string" name="geneName" value="MAOB"/>
    <att type="string" name="id" value="414909"/>
    <graphics type="ELLIPSE" h="40.0" w="40.0" x="423.6150817871094" y="4610.18701171875" fill="#ccccff" width="1" outline="#666666" cy:nodeTransparency="1.0" cy:nodeLabelFont="SansSerif.bold-0-12" cy:nodeLabel="MAOB" cy:borderLineType="solid"/>
  </node>
  <node label="100515532" id="-653">
    <att type="string" name="canonicalName" value="100515532"/>
    <att type="list" name="cytoscape.alias.list">
      <att type="string" name="cytoscape.alias.list" value="100515532"/>
    </att>
    <att type="string" name="geneName" value="LOC100515532"/>
    <att type="string" name="id" value="100515532"/>
    <graphics type="ELLIPSE" h="40.0" w="40.0" x="294.52630615234375" y="4552.4775390625" fill="#ccccff" width="1" outline="#666666" cy:nodeTransparency="1.0" cy:nodeLabelFont="SansSerif.bold-0-12" cy:nodeLabel="LOC100515532" cy:borderLineType="solid"/>
  </node>
  <node label="397604" id="-652">
    <att type="string" name="canonicalName" value="397604"/>
    <att type="list" name="cytoscape.alias.list">
      <att type="string" name="cytoscape.alias.list" value="397604"/>
    </att>
    <att type="string" name="geneName" value="HADH"/>
    <att type="string" name="id" value="397604"/>
    <graphics type="ELLIPSE" h="40.0" w="40.0" x="516.0403442382812" y="3777.716552734375" fill="#ccccff" width="1" outline="#666666" cy:nodeTransparency="1.0" cy:nodeLabelFont="SansSerif.bold-0-12" cy:nodeLabel="HADH" cy:borderLineType="solid"/>
  </node>
  <node label="397012" id="-651">
    <att type="string" name="canonicalName" value="397012"/>
    <att type="list" name="cytoscape.alias.list">
      <att type="string" name="cytoscape.alias.list" value="397012"/>
    </att>
    <att type="string" name="geneName" value="HADHA"/>
    <att type="string" name="id" value="397012"/>
    <graphics type="ELLIPSE" h="40.0" w="40.0" x="409.724609375" y="3775.983642578125" fill="#ccccff" width="1" outline="#666666" cy:nodeTransparency="1.0" cy:nodeLabelFont="SansSerif.bold-0-12" cy:nodeLabel="HADHA" cy:borderLineType="solid"/>
  </node>
  <node label="100153809" id="-650">
    <att type="string" name="canonicalName" value="100153809"/>
    <att type="list" name="cytoscape.alias.list">
      <att type="string" name="cytoscape.alias.list" value="100153809"/>
    </att>
    <att type="string" name="geneName" value="LOC100153809"/>
    <att type="string" name="id" value="100153809"/>
    <graphics type="ELLIPSE" h="40.0" w="40.0" x="296.5209045410156" y="4411.81787109375" fill="#ccccff" width="1" outline="#666666" cy:nodeTransparency="1.0" cy:nodeLabelFont="SansSerif.bold-0-12" cy:nodeLabel="LOC100153809" cy:borderLineType="solid"/>
  </node>
  <node label="100522477" id="-649">
    <att type="string" name="canonicalName" value="100522477"/>
    <att type="list" name="cytoscape.alias.list">
      <att type="string" name="cytoscape.alias.list" value="100522477"/>
    </att>
    <att type="string" name="geneName" value="LOC100522477"/>
    <att type="string" name="id" value="100522477"/>
    <graphics type="ELLIPSE" h="40.0" w="40.0" x="471.0442810058594" y="3655.440185546875" fill="#ccccff" width="1" outline="#666666" cy:nodeTransparency="1.0" cy:nodeLabelFont="SansSerif.bold-0-12" cy:nodeLabel="LOC100522477" cy:borderLineType="solid"/>
  </node>
  <node label="595105" id="-648">
    <att type="string" name="canonicalName" value="595105"/>
    <att type="list" name="cytoscape.alias.list">
      <att type="string" name="cytoscape.alias.list" value="595105"/>
    </att>
    <att type="string" name="geneName" value="CASP8"/>
    <att type="string" name="id" value="595105"/>
    <graphics type="ELLIPSE" h="40.0" w="40.0" x="1163.4259033203125" y="6460.18212890625" fill="#ccccff" width="1" outline="#666666" cy:nodeTransparency="1.0" cy:nodeLabelFont="SansSerif.bold-0-12" cy:nodeLabel="CASP8" cy:borderLineType="solid"/>
  </node>
  <node label="100518835" id="-647">
    <att type="string" name="canonicalName" value="100518835"/>
    <att type="list" name="cytoscape.alias.list">
      <att type="string" name="cytoscape.alias.list" value="100518835"/>
    </att>
    <att type="string" name="geneName" value="LOC100518835"/>
    <att type="string" name="id" value="100518835"/>
    <graphics type="ELLIPSE" h="40.0" w="40.0" x="1224.846435546875" y="6369.64501953125" fill="#ccccff" width="1" outline="#666666" cy:nodeTransparency="1.0" cy:nodeLabelFont="SansSerif.bold-0-12" cy:nodeLabel="LOC100518835" cy:borderLineType="solid"/>
  </node>
  <node label="100736854" id="-646">
    <att type="string" name="canonicalName" value="100736854"/>
    <att type="list" name="cytoscape.alias.list">
      <att type="string" name="cytoscape.alias.list" value="100736854"/>
    </att>
    <att type="string" name="geneName" value="LOC100736854"/>
    <att type="string" name="id" value="100736854"/>
    <graphics type="ELLIPSE" h="40.0" w="40.0" x="516.8536987304688" y="6780.95166015625" fill="#ccccff" width="1" outline="#666666" cy:nodeTransparency="1.0" cy:nodeLabelFont="SansSerif.bold-0-12" cy:nodeLabel="LOC100736854" cy:borderLineType="solid"/>
  </node>
  <node label="397028" id="-645">
    <att type="string" name="canonicalName" value="397028"/>
    <att type="list" name="cytoscape.alias.list">
      <att type="string" name="cytoscape.alias.list" value="397028"/>
    </att>
    <att type="string" name="geneName" value="HSP90AA1"/>
    <att type="string" name="id" value="397028"/>
    <graphics type="ELLIPSE" h="40.0" w="40.0" x="513.6334228515625" y="6888.66796875" fill="#ccccff" width="1" outline="#666666" cy:nodeTransparency="1.0" cy:nodeLabelFont="SansSerif.bold-0-12" cy:nodeLabel="HSP90AA1" cy:borderLineType="solid"/>
  </node>
  <node label="396629" id="-644">
    <att type="string" name="canonicalName" value="396629"/>
    <att type="list" name="cytoscape.alias.list">
      <att type="string" name="cytoscape.alias.list" value="396629"/>
    </att>
    <att type="string" name="geneName" value="TRAF6"/>
    <att type="string" name="id" value="396629"/>
    <graphics type="ELLIPSE" h="40.0" w="40.0" x="1286.5953369140625" y="6279.349609375" fill="#ccccff" width="1" outline="#666666" cy:nodeTransparency="1.0" cy:nodeLabelFont="SansSerif.bold-0-12" cy:nodeLabel="TRAF6" cy:borderLineType="solid"/>
  </node>
  <node label="396723" id="-643">
    <att type="string" name="canonicalName" value="396723"/>
    <att type="list" name="cytoscape.alias.list">
      <att type="string" name="cytoscape.alias.list" value="396723"/>
    </att>
    <att type="string" name="geneName" value="DDX58"/>
    <att type="string" name="id" value="396723"/>
    <graphics type="ELLIPSE" h="40.0" w="40.0" x="1015.1502685546875" y="6376.64208984375" fill="#ccccff" width="1" outline="#666666" cy:nodeTransparency="1.0" cy:nodeLabelFont="SansSerif.bold-0-12" cy:nodeLabel="DDX58" cy:borderLineType="solid"/>
  </node>
  <node label="100037290" id="-642">
    <att type="string" name="canonicalName" value="100037290"/>
    <att type="list" name="cytoscape.alias.list">
      <att type="string" name="cytoscape.alias.list" value="100037290"/>
    </att>
    <att type="string" name="geneName" value="MAVS"/>
    <att type="string" name="id" value="100037290"/>
    <graphics type="ELLIPSE" h="40.0" w="40.0" x="964.6414184570312" y="6471.8603515625" fill="#ccccff" width="1" outline="#666666" cy:nodeTransparency="1.0" cy:nodeLabelFont="SansSerif.bold-0-12" cy:nodeLabel="MAVS" cy:borderLineType="solid"/>
  </node>
  <node label="396617" id="-641">
    <att type="string" name="canonicalName" value="396617"/>
    <att type="list" name="cytoscape.alias.list">
      <att type="string" name="cytoscape.alias.list" value="396617"/>
    </att>
    <att type="string" name="geneName" value="MAP3K1"/>
    <att type="string" name="id" value="396617"/>
    <graphics type="ELLIPSE" h="40.0" w="40.0" x="1243.083740234375" y="544.56787109375" fill="#ccccff" width="1" outline="#666666" cy:nodeTransparency="1.0" cy:nodeLabelFont="SansSerif.bold-0-12" cy:nodeLabel="MAP3K1" cy:borderLineType="solid"/>
  </node>
  <node label="100156630" id="-640">
    <att type="string" name="canonicalName" value="100156630"/>
    <att type="list" name="cytoscape.alias.list">
      <att type="string" name="cytoscape.alias.list" value="100156630"/>
    </att>
    <att type="string" name="geneName" value="MAPK14"/>
    <att type="string" name="id" value="100156630"/>
    <graphics type="ELLIPSE" h="40.0" w="40.0" x="1346.851318359375" y="609.572265625" fill="#ccccff" width="1" outline="#666666" cy:nodeTransparency="1.0" cy:nodeLabelFont="SansSerif.bold-0-12" cy:nodeLabel="MAPK14" cy:borderLineType="solid"/>
  </node>
  <node label="100127355" id="-639">
    <att type="string" name="canonicalName" value="100127355"/>
    <att type="list" name="cytoscape.alias.list">
      <att type="string" name="cytoscape.alias.list" value="100127355"/>
    </att>
    <att type="string" name="geneName" value="IKBKG"/>
    <att type="string" name="id" value="100127355"/>
    <graphics type="ELLIPSE" h="40.0" w="40.0" x="1063.4259033203125" y="6279.349609375" fill="#ccccff" width="1" outline="#666666" cy:nodeTransparency="1.0" cy:nodeLabelFont="SansSerif.bold-0-12" cy:nodeLabel="IKBKG" cy:borderLineType="solid"/>
  </node>
  <node label="100155919" id="-638">
    <att type="string" name="canonicalName" value="100155919"/>
    <att type="list" name="cytoscape.alias.list">
      <att type="string" name="cytoscape.alias.list" value="100155919"/>
    </att>
    <att type="string" name="geneName" value="UPB1"/>
    <att type="string" name="id" value="100155919"/>
    <graphics type="ELLIPSE" h="40.0" w="40.0" x="395.60540771484375" y="4426.44677734375" fill="#ccccff" width="1" outline="#666666" cy:nodeTransparency="1.0" cy:nodeLabelFont="SansSerif.bold-0-12" cy:nodeLabel="UPB1" cy:borderLineType="solid"/>
  </node>
  <node label="397500" id="-637">
    <att type="string" name="canonicalName" value="397500"/>
    <att type="list" name="cytoscape.alias.list">
      <att type="string" name="cytoscape.alias.list" value="397500"/>
    </att>
    <att type="string" name="geneName" value="ABAT"/>
    <att type="string" name="id" value="397500"/>
    <graphics type="ELLIPSE" h="40.0" w="40.0" x="227.02151489257812" y="4371.33349609375" fill="#ccccff" width="1" outline="#666666" cy:nodeTransparency="1.0" cy:nodeLabelFont="SansSerif.bold-0-12" cy:nodeLabel="ABAT" cy:borderLineType="solid"/>
  </node>
  <node label="396929" id="-636">
    <att type="string" name="canonicalName" value="396929"/>
    <att type="list" name="cytoscape.alias.list">
      <att type="string" name="cytoscape.alias.list" value="396929"/>
    </att>
    <att type="string" name="geneName" value="GAD2"/>
    <att type="string" name="id" value="396929"/>
    <graphics type="ELLIPSE" h="40.0" w="40.0" x="334.3493957519531" y="4322.986328125" fill="#ccccff" width="1" outline="#666666" cy:nodeTransparency="1.0" cy:nodeLabelFont="SansSerif.bold-0-12" cy:nodeLabel="GAD2" cy:borderLineType="solid"/>
  </node>
  <node label="100158127" id="-635">
    <att type="string" name="canonicalName" value="100158127"/>
    <att type="list" name="cytoscape.alias.list">
      <att type="string" name="cytoscape.alias.list" value="100158127"/>
    </att>
    <att type="string" name="geneName" value="CNDP2"/>
    <att type="string" name="id" value="100158127"/>
    <graphics type="ELLIPSE" h="40.0" w="40.0" x="631.3194580078125" y="4537.9560546875" fill="#ccccff" width="1" outline="#666666" cy:nodeTransparency="1.0" cy:nodeLabelFont="SansSerif.bold-0-12" cy:nodeLabel="CNDP2" cy:borderLineType="solid"/>
  </node>
  <node label="100170131" id="-634">
    <att type="string" name="canonicalName" value="100170131"/>
    <att type="list" name="cytoscape.alias.list">
      <att type="string" name="cytoscape.alias.list" value="100170131"/>
    </att>
    <att type="string" name="geneName" value="CYCS"/>
    <att type="string" name="id" value="100170131"/>
    <graphics type="ELLIPSE" h="40.0" w="40.0" x="1330.125244140625" y="1210.901123046875" fill="#ccccff" width="1" outline="#666666" cy:nodeTransparency="1.0" cy:nodeLabelFont="SansSerif.bold-0-12" cy:nodeLabel="CYCS" cy:borderLineType="solid"/>
  </node>
  <node label="100518913" id="-633">
    <att type="string" name="canonicalName" value="100518913"/>
    <att type="list" name="cytoscape.alias.list">
      <att type="string" name="cytoscape.alias.list" value="100518913"/>
    </att>
    <att type="string" name="geneName" value="LOC100518913"/>
    <att type="string" name="id" value="100518913"/>
    <graphics type="ELLIPSE" h="40.0" w="40.0" x="1202.8946533203125" y="1228.2119140625" fill="#ccccff" width="1" outline="#666666" cy:nodeTransparency="1.0" cy:nodeLabelFont="SansSerif.bold-0-12" cy:nodeLabel="LOC100518913" cy:borderLineType="solid"/>
  </node>
  <node label="397536" id="-632">
    <att type="string" name="canonicalName" value="397536"/>
    <att type="list" name="cytoscape.alias.list">
      <att type="string" name="cytoscape.alias.list" value="397536"/>
    </att>
    <att type="string" name="geneName" value="BCL2L1"/>
    <att type="string" name="id" value="397536"/>
    <graphics type="ELLIPSE" h="40.0" w="40.0" x="1351.966796875" y="2527.86181640625" fill="#ccccff" width="1" outline="#666666" cy:nodeTransparency="1.0" cy:nodeLabelFont="SansSerif.bold-0-12" cy:nodeLabel="BCL2L1" cy:borderLineType="solid"/>
  </node>
  <node label="751869" id="-631">
    <att type="string" name="canonicalName" value="751869"/>
    <att type="list" name="cytoscape.alias.list">
      <att type="string" name="cytoscape.alias.list" value="751869"/>
    </att>
    <att type="string" name="geneName" value="NFKB1"/>
    <att type="string" name="id" value="751869"/>
    <graphics type="ELLIPSE" h="40.0" w="40.0" x="1525.2708740234375" y="2612.64892578125" fill="#ccccff" width="1" outline="#666666" cy:nodeTransparency="1.0" cy:nodeLabelFont="SansSerif.bold-0-12" cy:nodeLabel="NFKB1" cy:borderLineType="solid"/>
  </node>
  <node label="397091" id="-630">
    <att type="string" name="canonicalName" value="397091"/>
    <att type="list" name="cytoscape.alias.list">
      <att type="string" name="cytoscape.alias.list" value="397091"/>
    </att>
    <att type="string" name="geneName" value="PRKAR1A"/>
    <att type="string" name="id" value="397091"/>
    <graphics type="ELLIPSE" h="40.0" w="40.0" x="1054.2786865234375" y="2346.69775390625" fill="#ccccff" width="1" outline="#666666" cy:nodeTransparency="1.0" cy:nodeLabelFont="SansSerif.bold-0-12" cy:nodeLabel="PRKAR1A" cy:borderLineType="solid"/>
  </node>
  <node label="100521065" id="-629">
    <att type="string" name="canonicalName" value="100521065"/>
    <att type="list" name="cytoscape.alias.list">
      <att type="string" name="cytoscape.alias.list" value="100521065"/>
    </att>
    <att type="string" name="geneName" value="LOC100521065"/>
    <att type="string" name="id" value="100521065"/>
    <graphics type="ELLIPSE" h="40.0" w="40.0" x="1157.674072265625" y="2473.65185546875" fill="#ccccff" width="1" outline="#666666" cy:nodeTransparency="1.0" cy:nodeLabelFont="SansSerif.bold-0-12" cy:nodeLabel="LOC100521065" cy:borderLineType="solid"/>
  </node>
  <node label="100513811" id="-628">
    <att type="string" name="canonicalName" value="100513811"/>
    <att type="list" name="cytoscape.alias.list">
      <att type="string" name="cytoscape.alias.list" value="100513811"/>
    </att>
    <att type="string" name="geneName" value="AKT3"/>
    <att type="string" name="id" value="100513811"/>
    <graphics type="ELLIPSE" h="40.0" w="40.0" x="1038.667236328125" y="2459.965576171875" fill="#ccccff" width="1" outline="#666666" cy:nodeTransparency="1.0" cy:nodeLabelFont="SansSerif.bold-0-12" cy:nodeLabel="AKT3" cy:borderLineType="solid"/>
  </node>
  <node label="100522926" id="-627">
    <att type="string" name="canonicalName" value="100522926"/>
    <att type="list" name="cytoscape.alias.list">
      <att type="string" name="cytoscape.alias.list" value="100522926"/>
    </att>
    <att type="string" name="geneName" value="LOC100522926"/>
    <att type="string" name="id" value="100522926"/>
    <graphics type="ELLIPSE" h="40.0" w="40.0" x="1865.238037109375" y="2850.5830078125" fill="#ccccff" width="1" outline="#666666" cy:nodeTransparency="1.0" cy:nodeLabelFont="SansSerif.bold-0-12" cy:nodeLabel="LOC100522926" cy:borderLineType="solid"/>
  </node>
  <node label="100513348" id="-626">
    <att type="string" name="canonicalName" value="100513348"/>
    <att type="list" name="cytoscape.alias.list">
      <att type="string" name="cytoscape.alias.list" value="100513348"/>
    </att>
    <att type="string" name="geneName" value="EIF2AK3"/>
    <att type="string" name="id" value="100513348"/>
    <graphics type="ELLIPSE" h="40.0" w="40.0" x="413.6333923339844" y="6780.95166015625" fill="#ccccff" width="1" outline="#666666" cy:nodeTransparency="1.0" cy:nodeLabelFont="SansSerif.bold-0-12" cy:nodeLabel="EIF2AK3" cy:borderLineType="solid"/>
  </node>
  <node label="780410" id="-625">
    <att type="string" name="canonicalName" value="780410"/>
    <att type="list" name="cytoscape.alias.list">
      <att type="string" name="cytoscape.alias.list" value="780410"/>
    </att>
    <att type="string" name="geneName" value="PSEN2"/>
    <att type="string" name="id" value="780410"/>
    <graphics type="ELLIPSE" h="40.0" w="40.0" x="410.68438720703125" y="6888.67578125" fill="#ccccff" width="1" outline="#666666" cy:nodeTransparency="1.0" cy:nodeLabelFont="SansSerif.bold-0-12" cy:nodeLabel="PSEN2" cy:borderLineType="solid"/>
  </node>
  <node label="100144302" id="-624">
    <att type="string" name="canonicalName" value="100144302"/>
    <att type="list" name="cytoscape.alias.list">
      <att type="string" name="cytoscape.alias.list" value="100144302"/>
    </att>
    <att type="string" name="geneName" value="ATF4"/>
    <att type="string" name="id" value="100144302"/>
    <graphics type="ELLIPSE" h="40.0" w="40.0" x="1684.4422607421875" y="2005.6363525390625" fill="#ccccff" width="1" outline="#666666" cy:nodeTransparency="1.0" cy:nodeLabelFont="SansSerif.bold-0-12" cy:nodeLabel="ATF4" cy:borderLineType="solid"/>
  </node>
  <node label="100520353" id="-623">
    <att type="string" name="canonicalName" value="100520353"/>
    <att type="list" name="cytoscape.alias.list">
      <att type="string" name="cytoscape.alias.list" value="100520353"/>
    </att>
    <att type="string" name="geneName" value="LOC100520353"/>
    <att type="string" name="id" value="100520353"/>
    <graphics type="ELLIPSE" h="40.0" w="40.0" x="1791.6070556640625" y="1898.0517578125" fill="#ccccff" width="1" outline="#666666" cy:nodeTransparency="1.0" cy:nodeLabelFont="SansSerif.bold-0-12" cy:nodeLabel="LOC100520353" cy:borderLineType="solid"/>
  </node>
  <node label="396913" id="-622">
    <att type="string" name="canonicalName" value="396913"/>
    <att type="list" name="cytoscape.alias.list">
      <att type="string" name="cytoscape.alias.list" value="396913"/>
    </att>
    <att type="string" name="geneName" value="C-JUN"/>
    <att type="string" name="id" value="396913"/>
    <graphics type="ELLIPSE" h="40.0" w="40.0" x="1701.808349609375" y="2716.14990234375" fill="#ccccff" width="1" outline="#666666" cy:nodeTransparency="1.0" cy:nodeLabelFont="SansSerif.bold-0-12" cy:nodeLabel="C-JUN" cy:borderLineType="solid"/>
  </node>
  <node label="100520468" id="-621">
    <att type="string" name="canonicalName" value="100520468"/>
    <att type="list" name="cytoscape.alias.list">
      <att type="string" name="cytoscape.alias.list" value="100520468"/>
    </att>
    <att type="string" name="geneName" value="CREB3L2"/>
    <att type="string" name="id" value="100520468"/>
    <graphics type="ELLIPSE" h="40.0" w="40.0" x="2392.082275390625" y="1859.796875" fill="#ccccff" width="1" outline="#666666" cy:nodeTransparency="1.0" cy:nodeLabelFont="SansSerif.bold-0-12" cy:nodeLabel="CREB3L2" cy:borderLineType="solid"/>
  </node>
  <node label="397652" id="-620">
    <att type="string" name="canonicalName" value="397652"/>
    <att type="list" name="cytoscape.alias.list">
      <att type="string" name="cytoscape.alias.list" value="397652"/>
    </att>
    <att type="string" name="geneName" value="PRKACA"/>
    <att type="string" name="id" value="397652"/>
    <graphics type="ELLIPSE" h="40.0" w="40.0" x="2306.0703125" y="1946.745849609375" fill="#ccccff" width="1" outline="#666666" cy:nodeTransparency="1.0" cy:nodeLabelFont="SansSerif.bold-0-12" cy:nodeLabel="PRKACA" cy:borderLineType="solid"/>
  </node>
  <node label="100516663" id="-619">
    <att type="string" name="canonicalName" value="100516663"/>
    <att type="list" name="cytoscape.alias.list">
      <att type="string" name="cytoscape.alias.list" value="100516663"/>
    </att>
    <att type="string" name="geneName" value="CREB3L1"/>
    <att type="string" name="id" value="100516663"/>
    <graphics type="ELLIPSE" h="40.0" w="40.0" x="1629.55078125" y="2302.087646484375" fill="#ccccff" width="1" outline="#666666" cy:nodeTransparency="1.0" cy:nodeLabelFont="SansSerif.bold-0-12" cy:nodeLabel="CREB3L1" cy:borderLineType="solid"/>
  </node>
  <node label="100524223" id="-618">
    <att type="string" name="canonicalName" value="100524223"/>
    <att type="list" name="cytoscape.alias.list">
      <att type="string" name="cytoscape.alias.list" value="100524223"/>
    </att>
    <att type="string" name="geneName" value="HMGCS1"/>
    <att type="string" name="id" value="100524223"/>
    <graphics type="ELLIPSE" h="40.0" w="40.0" x="406.9770812988281" y="3839.01611328125" fill="#ccccff" width="1" outline="#666666" cy:nodeTransparency="1.0" cy:nodeLabelFont="SansSerif.bold-0-12" cy:nodeLabel="HMGCS1" cy:borderLineType="solid"/>
  </node>
  <node label="100626793" id="-617">
    <att type="string" name="canonicalName" value="100626793"/>
    <att type="list" name="cytoscape.alias.list">
      <att type="string" name="cytoscape.alias.list" value="100626793"/>
    </att>
    <att type="string" name="geneName" value="ACAT1"/>
    <att type="string" name="id" value="100626793"/>
    <graphics type="ELLIPSE" h="40.0" w="40.0" x="277.39764404296875" y="3852.64501953125" fill="#ccccff" width="1" outline="#666666" cy:nodeTransparency="1.0" cy:nodeLabelFont="SansSerif.bold-0-12" cy:nodeLabel="ACAT1" cy:borderLineType="solid"/>
  </node>
  <node label="100515577" id="-616">
    <att type="string" name="canonicalName" value="100515577"/>
    <att type="list" name="cytoscape.alias.list">
      <att type="string" name="cytoscape.alias.list" value="100515577"/>
    </att>
    <att type="string" name="geneName" value="ACAA1"/>
    <att type="string" name="id" value="100515577"/>
    <graphics type="ELLIPSE" h="40.0" w="40.0" x="515.369873046875" y="3845.102294921875" fill="#ccccff" width="1" outline="#666666" cy:nodeTransparency="1.0" cy:nodeLabelFont="SansSerif.bold-0-12" cy:nodeLabel="ACAA1" cy:borderLineType="solid"/>
  </node>
  <node label="100516841" id="-615">
    <att type="string" name="canonicalName" value="100516841"/>
    <att type="list" name="cytoscape.alias.list">
      <att type="string" name="cytoscape.alias.list" value="100516841"/>
    </att>
    <att type="string" name="geneName" value="LOC100516841"/>
    <att type="string" name="id" value="100516841"/>
    <graphics type="ELLIPSE" h="40.0" w="40.0" x="151.53329467773438" y="4366.08740234375" fill="#ccccff" width="1" outline="#666666" cy:nodeTransparency="1.0" cy:nodeLabelFont="SansSerif.bold-0-12" cy:nodeLabel="LOC100516841" cy:borderLineType="solid"/>
  </node>
  <node label="100514687" id="-614">
    <att type="string" name="canonicalName" value="100514687"/>
    <att type="list" name="cytoscape.alias.list">
      <att type="string" name="cytoscape.alias.list" value="100514687"/>
    </att>
    <att type="string" name="geneName" value="LOC100514687"/>
    <att type="string" name="id" value="100514687"/>
    <graphics type="ELLIPSE" h="40.0" w="40.0" x="33.29974365234375" y="4334.337890625" fill="#ccccff" width="1" outline="#666666" cy:nodeTransparency="1.0" cy:nodeLabelFont="SansSerif.bold-0-12" cy:nodeLabel="LOC100514687" cy:borderLineType="solid"/>
  </node>
  <node label="448846" id="-613">
    <att type="string" name="canonicalName" value="448846"/>
    <att type="list" name="cytoscape.alias.list">
      <att type="string" name="cytoscape.alias.list" value="448846"/>
    </att>
    <att type="string" name="geneName" value="EHHADH"/>
    <att type="string" name="id" value="448846"/>
    <graphics type="ELLIPSE" h="40.0" w="40.0" x="190.91799926757812" y="4487.45654296875" fill="#ccccff" width="1" outline="#666666" cy:nodeTransparency="1.0" cy:nodeLabelFont="SansSerif.bold-0-12" cy:nodeLabel="EHHADH" cy:borderLineType="solid"/>
  </node>
  <node label="100312959" id="-612">
    <att type="string" name="canonicalName" value="100312959"/>
    <att type="list" name="cytoscape.alias.list">
      <att type="string" name="cytoscape.alias.list" value="100312959"/>
    </att>
    <att type="string" name="geneName" value="ACAA2"/>
    <att type="string" name="id" value="100312959"/>
    <graphics type="ELLIPSE" h="40.0" w="40.0" x="53.88751220703125" y="3874.602294921875" fill="#ccccff" width="1" outline="#666666" cy:nodeTransparency="1.0" cy:nodeLabelFont="SansSerif.bold-0-12" cy:nodeLabel="ACAA2" cy:borderLineType="solid"/>
  </node>
  <node label="100621218" id="-611">
    <att type="string" name="canonicalName" value="100621218"/>
    <att type="list" name="cytoscape.alias.list">
      <att type="string" name="cytoscape.alias.list" value="100621218"/>
    </att>
    <att type="string" name="geneName" value="LOC100621218"/>
    <att type="string" name="id" value="100621218"/>
    <graphics type="ELLIPSE" h="40.0" w="40.0" x="174.8084716796875" y="3886.005615234375" fill="#ccccff" width="1" outline="#666666" cy:nodeTransparency="1.0" cy:nodeLabelFont="SansSerif.bold-0-12" cy:nodeLabel="LOC100621218" cy:borderLineType="solid"/>
  </node>
  <node label="100522257" id="-610">
    <att type="string" name="canonicalName" value="100522257"/>
    <att type="list" name="cytoscape.alias.list">
      <att type="string" name="cytoscape.alias.list" value="100522257"/>
    </att>
    <att type="string" name="geneName" value="IL4I1"/>
    <att type="string" name="id" value="100522257"/>
    <graphics type="ELLIPSE" h="40.0" w="40.0" x="1160.33740234375" y="4281.1279296875" fill="#ccccff" width="1" outline="#666666" cy:nodeTransparency="1.0" cy:nodeLabelFont="SansSerif.bold-0-12" cy:nodeLabel="IL4I1" cy:borderLineType="solid"/>
  </node>
  <node label="100142669" id="-609">
    <att type="string" name="canonicalName" value="100142669"/>
    <att type="list" name="cytoscape.alias.list">
      <att type="string" name="cytoscape.alias.list" value="100142669"/>
    </att>
    <att type="string" name="geneName" value="BCKDHB"/>
    <att type="string" name="id" value="100142669"/>
    <graphics type="ELLIPSE" h="40.0" w="40.0" x="1081.0430908203125" y="4201.0146484375" fill="#ccccff" width="1" outline="#666666" cy:nodeTransparency="1.0" cy:nodeLabelFont="SansSerif.bold-0-12" cy:nodeLabel="BCKDHB" cy:borderLineType="solid"/>
  </node>
  <node label="100516656" id="-608">
    <att type="string" name="canonicalName" value="100516656"/>
    <att type="list" name="cytoscape.alias.list">
      <att type="string" name="cytoscape.alias.list" value="100516656"/>
    </att>
    <att type="string" name="geneName" value="LOC100516656"/>
    <att type="string" name="id" value="100516656"/>
    <graphics type="ELLIPSE" h="40.0" w="40.0" x="413.5736389160156" y="4503.97265625" fill="#ccccff" width="1" outline="#666666" cy:nodeTransparency="1.0" cy:nodeLabelFont="SansSerif.bold-0-12" cy:nodeLabel="LOC100516656" cy:borderLineType="solid"/>
  </node>
  <node label="100153301" id="-607">
    <att type="string" name="canonicalName" value="100153301"/>
    <att type="list" name="cytoscape.alias.list">
      <att type="string" name="cytoscape.alias.list" value="100153301"/>
    </att>
    <att type="string" name="geneName" value="ALDH6A1"/>
    <att type="string" name="id" value="100153301"/>
    <graphics type="ELLIPSE" h="40.0" w="40.0" x="288.7704772949219" y="4173.7587890625" fill="#ccccff" width="1" outline="#666666" cy:nodeTransparency="1.0" cy:nodeLabelFont="SansSerif.bold-0-12" cy:nodeLabel="ALDH6A1" cy:borderLineType="solid"/>
  </node>
  <node label="397017" id="-606">
    <att type="string" name="canonicalName" value="397017"/>
    <att type="list" name="cytoscape.alias.list">
      <att type="string" name="cytoscape.alias.list" value="397017"/>
    </att>
    <att type="string" name="geneName" value="LCTHIO"/>
    <att type="string" name="id" value="397017"/>
    <graphics type="ELLIPSE" h="40.0" w="40.0" x="313.4172058105469" y="4004.13330078125" fill="#ccccff" width="1" outline="#666666" cy:nodeTransparency="1.0" cy:nodeLabelFont="SansSerif.bold-0-12" cy:nodeLabel="LCTHIO" cy:borderLineType="solid"/>
  </node>
  <node label="100152303" id="-605">
    <att type="string" name="canonicalName" value="100152303"/>
    <att type="list" name="cytoscape.alias.list">
      <att type="string" name="cytoscape.alias.list" value="100152303"/>
    </att>
    <att type="string" name="geneName" value="LOC100152303"/>
    <att type="string" name="id" value="100152303"/>
    <graphics type="ELLIPSE" h="40.0" w="40.0" x="307.8285827636719" y="3879.6298828125" fill="#ccccff" width="1" outline="#666666" cy:nodeTransparency="1.0" cy:nodeLabelFont="SansSerif.bold-0-12" cy:nodeLabel="LOC100152303" cy:borderLineType="solid"/>
  </node>
  <node label="100158147" id="-604">
    <att type="string" name="canonicalName" value="100158147"/>
    <att type="list" name="cytoscape.alias.list">
      <att type="string" name="cytoscape.alias.list" value="100158147"/>
    </att>
    <att type="string" name="geneName" value="PCCB"/>
    <att type="string" name="id" value="100158147"/>
    <graphics type="ELLIPSE" h="40.0" w="40.0" x="232.71990966796875" y="4091.7177734375" fill="#ccccff" width="1" outline="#666666" cy:nodeTransparency="1.0" cy:nodeLabelFont="SansSerif.bold-0-12" cy:nodeLabel="PCCB" cy:borderLineType="solid"/>
  </node>
  <node label="100518224" id="-603">
    <att type="string" name="canonicalName" value="100518224"/>
    <att type="list" name="cytoscape.alias.list">
      <att type="string" name="cytoscape.alias.list" value="100518224"/>
    </att>
    <att type="string" name="geneName" value="LOC100518224"/>
    <att type="string" name="id" value="100518224"/>
    <graphics type="ELLIPSE" h="40.0" w="40.0" x="530.6669921875" y="3706.87060546875" fill="#ccccff" width="1" outline="#666666" cy:nodeTransparency="1.0" cy:nodeLabelFont="SansSerif.bold-0-12" cy:nodeLabel="LOC100518224" cy:borderLineType="solid"/>
  </node>
  <node label="396932" id="-602">
    <att type="string" name="canonicalName" value="396932"/>
    <att type="list" name="cytoscape.alias.list">
      <att type="string" name="cytoscape.alias.list" value="396932"/>
    </att>
    <att type="string" name="geneName" value="ACADS"/>
    <att type="string" name="id" value="396932"/>
    <graphics type="ELLIPSE" h="40.0" w="40.0" x="317.5129699707031" y="3734.357421875" fill="#ccccff" width="1" outline="#666666" cy:nodeTransparency="1.0" cy:nodeLabelFont="SansSerif.bold-0-12" cy:nodeLabel="ACADS" cy:borderLineType="solid"/>
  </node>
  <node label="100154810" id="-601">
    <att type="string" name="canonicalName" value="100154810"/>
    <att type="list" name="cytoscape.alias.list">
      <att type="string" name="cytoscape.alias.list" value="100154810"/>
    </att>
    <att type="string" name="geneName" value="ACADSB"/>
    <att type="string" name="id" value="100154810"/>
    <graphics type="ELLIPSE" h="40.0" w="40.0" x="390.60308837890625" y="3645.523193359375" fill="#ccccff" width="1" outline="#666666" cy:nodeTransparency="1.0" cy:nodeLabelFont="SansSerif.bold-0-12" cy:nodeLabel="ACADSB" cy:borderLineType="solid"/>
  </node>
  <node label="100624482" id="-600">
    <att type="string" name="canonicalName" value="100624482"/>
    <att type="list" name="cytoscape.alias.list">
      <att type="string" name="cytoscape.alias.list" value="100624482"/>
    </att>
    <att type="string" name="geneName" value="MCCC1"/>
    <att type="string" name="id" value="100624482"/>
    <graphics type="ELLIPSE" h="40.0" w="40.0" x="146.84848022460938" y="4618.71826171875" fill="#ccccff" width="1" outline="#666666" cy:nodeTransparency="1.0" cy:nodeLabelFont="SansSerif.bold-0-12" cy:nodeLabel="MCCC1" cy:borderLineType="solid"/>
  </node>
  <node label="100626434" id="-599">
    <att type="string" name="canonicalName" value="100626434"/>
    <att type="list" name="cytoscape.alias.list">
      <att type="string" name="cytoscape.alias.list" value="100626434"/>
    </att>
    <att type="string" name="geneName" value="ADI1"/>
    <att type="string" name="id" value="100626434"/>
    <graphics type="ELLIPSE" h="40.0" w="40.0" x="1201.8056640625" y="4159.96923828125" fill="#ccccff" width="1" outline="#666666" cy:nodeTransparency="1.0" cy:nodeLabelFont="SansSerif.bold-0-12" cy:nodeLabel="ADI1" cy:borderLineType="solid"/>
  </node>
  <node label="100511394" id="-598">
    <att type="string" name="canonicalName" value="100511394"/>
    <att type="list" name="cytoscape.alias.list">
      <att type="string" name="cytoscape.alias.list" value="100511394"/>
    </att>
    <att type="string" name="geneName" value="ENOPH1"/>
    <att type="string" name="id" value="100511394"/>
    <graphics type="ELLIPSE" h="40.0" w="40.0" x="1231.761962890625" y="4046.878662109375" fill="#ccccff" width="1" outline="#666666" cy:nodeTransparency="1.0" cy:nodeLabelFont="SansSerif.bold-0-12" cy:nodeLabel="ENOPH1" cy:borderLineType="solid"/>
  </node>
  <node label="100312974" id="-597">
    <att type="string" name="canonicalName" value="100312974"/>
    <att type="list" name="cytoscape.alias.list">
      <att type="string" name="cytoscape.alias.list" value="100312974"/>
    </att>
    <att type="string" name="geneName" value="MAT2A"/>
    <att type="string" name="id" value="100312974"/>
    <graphics type="ELLIPSE" h="40.0" w="40.0" x="310.68438720703125" y="6780.95166015625" fill="#ccccff" width="1" outline="#666666" cy:nodeTransparency="1.0" cy:nodeLabelFont="SansSerif.bold-0-12" cy:nodeLabel="MAT2A" cy:borderLineType="solid"/>
  </node>
  <node label="100037301" id="-596">
    <att type="string" name="canonicalName" value="100037301"/>
    <att type="list" name="cytoscape.alias.list">
      <att type="string" name="cytoscape.alias.list" value="100037301"/>
    </att>
    <att type="string" name="geneName" value="DNMT3A"/>
    <att type="string" name="id" value="100037301"/>
    <graphics type="ELLIPSE" h="40.0" w="40.0" x="307.8877258300781" y="6888.6796875" fill="#ccccff" width="1" outline="#666666" cy:nodeTransparency="1.0" cy:nodeLabelFont="SansSerif.bold-0-12" cy:nodeLabel="DNMT3A" cy:borderLineType="solid"/>
  </node>
  <node label="100217381" id="-595">
    <att type="string" name="canonicalName" value="100217381"/>
    <att type="list" name="cytoscape.alias.list">
      <att type="string" name="cytoscape.alias.list" value="100217381"/>
    </att>
    <att type="string" name="geneName" value="MAT2B"/>
    <att type="string" name="id" value="100217381"/>
    <graphics type="ELLIPSE" h="40.0" w="40.0" x="1283.5859375" y="4275.8994140625" fill="#ccccff" width="1" outline="#666666" cy:nodeTransparency="1.0" cy:nodeLabelFont="SansSerif.bold-0-12" cy:nodeLabel="MAT2B" cy:borderLineType="solid"/>
  </node>
  <node label="397371" id="-594">
    <att type="string" name="canonicalName" value="397371"/>
    <att type="list" name="cytoscape.alias.list">
      <att type="string" name="cytoscape.alias.list" value="397371"/>
    </att>
    <att type="string" name="geneName" value="BHMT"/>
    <att type="string" name="id" value="397371"/>
    <graphics type="ELLIPSE" h="40.0" w="40.0" x="123.358154296875" y="4563.99560546875" fill="#ccccff" width="1" outline="#666666" cy:nodeTransparency="1.0" cy:nodeLabelFont="SansSerif.bold-0-12" cy:nodeLabel="BHMT" cy:borderLineType="solid"/>
  </node>
  <node label="100514931" id="-593">
    <att type="string" name="canonicalName" value="100514931"/>
    <att type="list" name="cytoscape.alias.list">
      <att type="string" name="cytoscape.alias.list" value="100514931"/>
    </att>
    <att type="string" name="geneName" value="AHCYL2"/>
    <att type="string" name="id" value="100514931"/>
    <graphics type="ELLIPSE" h="40.0" w="40.0" x="26.18890380859375" y="4649.33447265625" fill="#ccccff" width="1" outline="#666666" cy:nodeTransparency="1.0" cy:nodeLabelFont="SansSerif.bold-0-12" cy:nodeLabel="AHCYL2" cy:borderLineType="solid"/>
  </node>
  <node label="397300" id="-592">
    <att type="string" name="canonicalName" value="397300"/>
    <att type="list" name="cytoscape.alias.list">
      <att type="string" name="cytoscape.alias.list" value="397300"/>
    </att>
    <att type="string" name="geneName" value="MTR"/>
    <att type="string" name="id" value="397300"/>
    <graphics type="ELLIPSE" h="40.0" w="40.0" x="1393.32470703125" y="4241.099609375" fill="#ccccff" width="1" outline="#666666" cy:nodeTransparency="1.0" cy:nodeLabelFont="SansSerif.bold-0-12" cy:nodeLabel="MTR" cy:borderLineType="solid"/>
  </node>
  <node label="100515508" id="-591">
    <att type="string" name="canonicalName" value="100515508"/>
    <att type="list" name="cytoscape.alias.list">
      <att type="string" name="cytoscape.alias.list" value="100515508"/>
    </att>
    <att type="string" name="geneName" value="LOC100515508"/>
    <att type="string" name="id" value="100515508"/>
    <graphics type="ELLIPSE" h="40.0" w="40.0" x="593.0354614257812" y="5668.84326171875" fill="#ccccff" width="1" outline="#666666" cy:nodeTransparency="1.0" cy:nodeLabelFont="SansSerif.bold-0-12" cy:nodeLabel="LOC100515508" cy:borderLineType="solid"/>
  </node>
  <node label="100525698" id="-590">
    <att type="string" name="canonicalName" value="100525698"/>
    <att type="list" name="cytoscape.alias.list">
      <att type="string" name="cytoscape.alias.list" value="100525698"/>
    </att>
    <att type="string" name="geneName" value="LOC100525698"/>
    <att type="string" name="id" value="100525698"/>
    <graphics type="ELLIPSE" h="40.0" w="40.0" x="530.0956420898438" y="5758.86962890625" fill="#ccccff" width="1" outline="#666666" cy:nodeTransparency="1.0" cy:nodeLabelFont="SansSerif.bold-0-12" cy:nodeLabel="LOC100525698" cy:borderLineType="solid"/>
  </node>
  <node label="100513890" id="-589">
    <att type="string" name="canonicalName" value="100513890"/>
    <att type="list" name="cytoscape.alias.list">
      <att type="string" name="cytoscape.alias.list" value="100513890"/>
    </att>
    <att type="string" name="geneName" value="AGXT2"/>
    <att type="string" name="id" value="100513890"/>
    <graphics type="ELLIPSE" h="40.0" w="40.0" x="681.5203247070312" y="5601.8984375" fill="#ccccff" width="1" outline="#666666" cy:nodeTransparency="1.0" cy:nodeLabelFont="SansSerif.bold-0-12" cy:nodeLabel="AGXT2" cy:borderLineType="solid"/>
  </node>
  <node label="100525563" id="-588">
    <att type="string" name="canonicalName" value="100525563"/>
    <att type="list" name="cytoscape.alias.list">
      <att type="string" name="cytoscape.alias.list" value="100525563"/>
    </att>
    <att type="string" name="geneName" value="DMGDH"/>
    <att type="string" name="id" value="100525563"/>
    <graphics type="ELLIPSE" h="40.0" w="40.0" x="0.0" y="4544.54443359375" fill="#ccccff" width="1" outline="#666666" cy:nodeTransparency="1.0" cy:nodeLabelFont="SansSerif.bold-0-12" cy:nodeLabel="DMGDH" cy:borderLineType="solid"/>
  </node>
  <node label="397444" id="-587">
    <att type="string" name="canonicalName" value="397444"/>
    <att type="list" name="cytoscape.alias.list">
      <att type="string" name="cytoscape.alias.list" value="397444"/>
    </att>
    <att type="string" name="geneName" value="GNMT"/>
    <att type="string" name="id" value="397444"/>
    <graphics type="ELLIPSE" h="40.0" w="40.0" x="899.3079833984375" y="5594.57763671875" fill="#ccccff" width="1" outline="#666666" cy:nodeTransparency="1.0" cy:nodeLabelFont="SansSerif.bold-0-12" cy:nodeLabel="GNMT" cy:borderLineType="solid"/>
  </node>
  <node label="100126844" id="-586">
    <att type="string" name="canonicalName" value="100126844"/>
    <att type="list" name="cytoscape.alias.list">
      <att type="string" name="cytoscape.alias.list" value="100126844"/>
    </att>
    <att type="string" name="geneName" value="GATM"/>
    <att type="string" name="id" value="100126844"/>
    <graphics type="ELLIPSE" h="40.0" w="40.0" x="789.4036254882812" y="5579.4306640625" fill="#ccccff" width="1" outline="#666666" cy:nodeTransparency="1.0" cy:nodeLabelFont="SansSerif.bold-0-12" cy:nodeLabel="GATM" cy:borderLineType="solid"/>
  </node>
  <node label="100151982" id="-585">
    <att type="string" name="canonicalName" value="100151982"/>
    <att type="list" name="cytoscape.alias.list">
      <att type="string" name="cytoscape.alias.list" value="100151982"/>
    </att>
    <att type="string" name="geneName" value="CHDH"/>
    <att type="string" name="id" value="100151982"/>
    <graphics type="ELLIPSE" h="40.0" w="40.0" x="233.89404296875" y="4665.33349609375" fill="#ccccff" width="1" outline="#666666" cy:nodeTransparency="1.0" cy:nodeLabelFont="SansSerif.bold-0-12" cy:nodeLabel="CHDH" cy:borderLineType="solid"/>
  </node>
  <node label="396944" id="-584">
    <att type="string" name="canonicalName" value="396944"/>
    <att type="list" name="cytoscape.alias.list">
      <att type="string" name="cytoscape.alias.list" value="396944"/>
    </att>
    <att type="string" name="geneName" value="GLUL"/>
    <att type="string" name="id" value="396944"/>
    <graphics type="ELLIPSE" h="40.0" w="40.0" x="1445.0614013671875" y="4943.29736328125" fill="#ccccff" width="1" outline="#666666" cy:nodeTransparency="1.0" cy:nodeLabelFont="SansSerif.bold-0-12" cy:nodeLabel="GLUL" cy:borderLineType="solid"/>
  </node>
  <node label="100518539" id="-583">
    <att type="string" name="canonicalName" value="100518539"/>
    <att type="list" name="cytoscape.alias.list">
      <att type="string" name="cytoscape.alias.list" value="100518539"/>
    </att>
    <att type="string" name="geneName" value="LOC100518539"/>
    <att type="string" name="id" value="100518539"/>
    <graphics type="ELLIPSE" h="40.0" w="40.0" x="1369.0841064453125" y="5029.19921875" fill="#ccccff" width="1" outline="#666666" cy:nodeTransparency="1.0" cy:nodeLabelFont="SansSerif.bold-0-12" cy:nodeLabel="LOC100518539" cy:borderLineType="solid"/>
  </node>
  <node label="100157162" id="-582">
    <att type="string" name="canonicalName" value="100157162"/>
    <att type="list" name="cytoscape.alias.list">
      <att type="string" name="cytoscape.alias.list" value="100157162"/>
    </att>
    <att type="string" name="geneName" value="GLUD1"/>
    <att type="string" name="id" value="100157162"/>
    <graphics type="ELLIPSE" h="40.0" w="40.0" x="1543.59130859375" y="4991.41650390625" fill="#ccccff" width="1" outline="#666666" cy:nodeTransparency="1.0" cy:nodeLabelFont="SansSerif.bold-0-12" cy:nodeLabel="GLUD1" cy:borderLineType="solid"/>
  </node>
  <node label="399525" id="-581">
    <att type="string" name="canonicalName" value="399525"/>
    <att type="list" name="cytoscape.alias.list">
      <att type="string" name="cytoscape.alias.list" value="399525"/>
    </att>
    <att type="string" name="geneName" value="GLS"/>
    <att type="string" name="id" value="399525"/>
    <graphics type="ELLIPSE" h="40.0" w="40.0" x="1474.4146728515625" y="5080.0478515625" fill="#ccccff" width="1" outline="#666666" cy:nodeTransparency="1.0" cy:nodeLabelFont="SansSerif.bold-0-12" cy:nodeLabel="GLS" cy:borderLineType="solid"/>
  </node>
  <node label="100517450" id="-580">
    <att type="string" name="canonicalName" value="100517450"/>
    <att type="list" name="cytoscape.alias.list">
      <att type="string" name="cytoscape.alias.list" value="100517450"/>
    </att>
    <att type="string" name="geneName" value="LOC100517450"/>
    <att type="string" name="id" value="100517450"/>
    <graphics type="ELLIPSE" h="40.0" w="40.0" x="2131.280517578125" y="1177.1558837890625" fill="#ccccff" width="1" outline="#666666" cy:nodeTransparency="1.0" cy:nodeLabelFont="SansSerif.bold-0-12" cy:nodeLabel="LOC100517450" cy:borderLineType="solid"/>
  </node>
  <node label="100142626" id="-579">
    <att type="string" name="canonicalName" value="100142626"/>
    <att type="list" name="cytoscape.alias.list">
      <att type="string" name="cytoscape.alias.list" value="100142626"/>
    </att>
    <att type="string" name="geneName" value="NME1"/>
    <att type="string" name="id" value="100142626"/>
    <graphics type="ELLIPSE" h="40.0" w="40.0" x="2177.5615234375" y="1312.3515625" fill="#ccccff" width="1" outline="#666666" cy:nodeTransparency="1.0" cy:nodeLabelFont="SansSerif.bold-0-12" cy:nodeLabel="NME1" cy:borderLineType="solid"/>
  </node>
  <node label="100154035" id="-578">
    <att type="string" name="canonicalName" value="100154035"/>
    <att type="list" name="cytoscape.alias.list">
      <att type="string" name="cytoscape.alias.list" value="100154035"/>
    </att>
    <att type="string" name="geneName" value="POLR3D"/>
    <att type="string" name="id" value="100154035"/>
    <graphics type="ELLIPSE" h="40.0" w="40.0" x="2174.18701171875" y="1429.55517578125" fill="#ccccff" width="1" outline="#666666" cy:nodeTransparency="1.0" cy:nodeLabelFont="SansSerif.bold-0-12" cy:nodeLabel="POLR3D" cy:borderLineType="solid"/>
  </node>
  <node label="100520595" id="-577">
    <att type="string" name="canonicalName" value="100520595"/>
    <att type="list" name="cytoscape.alias.list">
      <att type="string" name="cytoscape.alias.list" value="100520595"/>
    </att>
    <att type="string" name="geneName" value="LOC100520595"/>
    <att type="string" name="id" value="100520595"/>
    <graphics type="ELLIPSE" h="40.0" w="40.0" x="2081.727783203125" y="1295.0037841796875" fill="#ccccff" width="1" outline="#666666" cy:nodeTransparency="1.0" cy:nodeLabelFont="SansSerif.bold-0-12" cy:nodeLabel="LOC100520595" cy:borderLineType="solid"/>
  </node>
  <node label="100620235" id="-576">
    <att type="string" name="canonicalName" value="100620235"/>
    <att type="list" name="cytoscape.alias.list">
      <att type="string" name="cytoscape.alias.list" value="100620235"/>
    </att>
    <att type="string" name="geneName" value="LOC100620235"/>
    <att type="string" name="id" value="100620235"/>
    <graphics type="ELLIPSE" h="40.0" w="40.0" x="2133.002197265625" y="1442.31298828125" fill="#ccccff" width="1" outline="#666666" cy:nodeTransparency="1.0" cy:nodeLabelFont="SansSerif.bold-0-12" cy:nodeLabel="LOC100620235" cy:borderLineType="solid"/>
  </node>
  <node label="397298" id="-575">
    <att type="string" name="canonicalName" value="397298"/>
    <att type="list" name="cytoscape.alias.list">
      <att type="string" name="cytoscape.alias.list" value="397298"/>
    </att>
    <att type="string" name="geneName" value="ENTPD1"/>
    <att type="string" name="id" value="397298"/>
    <graphics type="ELLIPSE" h="40.0" w="40.0" x="2022.5108642578125" y="1365.1064453125" fill="#ccccff" width="1" outline="#666666" cy:nodeTransparency="1.0" cy:nodeLabelFont="SansSerif.bold-0-12" cy:nodeLabel="ENTPD1" cy:borderLineType="solid"/>
  </node>
  <node label="100621123" id="-574">
    <att type="string" name="canonicalName" value="100621123"/>
    <att type="list" name="cytoscape.alias.list">
      <att type="string" name="cytoscape.alias.list" value="100621123"/>
    </att>
    <att type="string" name="geneName" value="LOC100621123"/>
    <att type="string" name="id" value="100621123"/>
    <graphics type="ELLIPSE" h="40.0" w="40.0" x="2145.426513671875" y="1120.1226806640625" fill="#ccccff" width="1" outline="#666666" cy:nodeTransparency="1.0" cy:nodeLabelFont="SansSerif.bold-0-12" cy:nodeLabel="LOC100621123" cy:borderLineType="solid"/>
  </node>
  <node label="100516367" id="-573">
    <att type="string" name="canonicalName" value="100516367"/>
    <att type="list" name="cytoscape.alias.list">
      <att type="string" name="cytoscape.alias.list" value="100516367"/>
    </att>
    <att type="string" name="geneName" value="LOC100516367"/>
    <att type="string" name="id" value="100516367"/>
    <graphics type="ELLIPSE" h="40.0" w="40.0" x="2393.261962890625" y="1509.4705810546875" fill="#ccccff" width="1" outline="#666666" cy:nodeTransparency="1.0" cy:nodeLabelFont="SansSerif.bold-0-12" cy:nodeLabel="LOC100516367" cy:borderLineType="solid"/>
  </node>
  <node label="100525292" id="-572">
    <att type="string" name="canonicalName" value="100525292"/>
    <att type="list" name="cytoscape.alias.list">
      <att type="string" name="cytoscape.alias.list" value="100525292"/>
    </att>
    <att type="string" name="geneName" value="LOC100525292"/>
    <att type="string" name="id" value="100525292"/>
    <graphics type="ELLIPSE" h="40.0" w="40.0" x="2386.23974609375" y="1396.0325927734375" fill="#ccccff" width="1" outline="#666666" cy:nodeTransparency="1.0" cy:nodeLabelFont="SansSerif.bold-0-12" cy:nodeLabel="LOC100525292" cy:borderLineType="solid"/>
  </node>
  <node label="100154506" id="-571">
    <att type="string" name="canonicalName" value="100154506"/>
    <att type="list" name="cytoscape.alias.list">
      <att type="string" name="cytoscape.alias.list" value="100154506"/>
    </att>
    <att type="string" name="geneName" value="ENTPD5"/>
    <att type="string" name="id" value="100154506"/>
    <graphics type="ELLIPSE" h="40.0" w="40.0" x="1980.430908203125" y="1360.9571533203125" fill="#ccccff" width="1" outline="#666666" cy:nodeTransparency="1.0" cy:nodeLabelFont="SansSerif.bold-0-12" cy:nodeLabel="ENTPD5" cy:borderLineType="solid"/>
  </node>
  <node label="100157205" id="-570">
    <att type="string" name="canonicalName" value="100157205"/>
    <att type="list" name="cytoscape.alias.list">
      <att type="string" name="cytoscape.alias.list" value="100157205"/>
    </att>
    <att type="string" name="geneName" value="RRM2B"/>
    <att type="string" name="id" value="100157205"/>
    <graphics type="ELLIPSE" h="40.0" w="40.0" x="2045.561279296875" y="1265.892578125" fill="#ccccff" width="1" outline="#666666" cy:nodeTransparency="1.0" cy:nodeLabelFont="SansSerif.bold-0-12" cy:nodeLabel="RRM2B" cy:borderLineType="solid"/>
  </node>
  <node label="100517646" id="-569">
    <att type="string" name="canonicalName" value="100517646"/>
    <att type="list" name="cytoscape.alias.list">
      <att type="string" name="cytoscape.alias.list" value="100517646"/>
    </att>
    <att type="string" name="geneName" value="LOC100517646"/>
    <att type="string" name="id" value="100517646"/>
    <graphics type="ELLIPSE" h="40.0" w="40.0" x="2268.284423828125" y="1124.022216796875" fill="#ccccff" width="1" outline="#666666" cy:nodeTransparency="1.0" cy:nodeLabelFont="SansSerif.bold-0-12" cy:nodeLabel="LOC100517646" cy:borderLineType="solid"/>
  </node>
  <node label="100521561" id="-568">
    <att type="string" name="canonicalName" value="100521561"/>
    <att type="list" name="cytoscape.alias.list">
      <att type="string" name="cytoscape.alias.list" value="100521561"/>
    </att>
    <att type="string" name="geneName" value="LOC100521561"/>
    <att type="string" name="id" value="100521561"/>
    <graphics type="ELLIPSE" h="40.0" w="40.0" x="2071.092529296875" y="1219.8828125" fill="#ccccff" width="1" outline="#666666" cy:nodeTransparency="1.0" cy:nodeLabelFont="SansSerif.bold-0-12" cy:nodeLabel="LOC100521561" cy:borderLineType="solid"/>
  </node>
  <node label="100155727" id="-567">
    <att type="string" name="canonicalName" value="100155727"/>
    <att type="list" name="cytoscape.alias.list">
      <att type="string" name="cytoscape.alias.list" value="100155727"/>
    </att>
    <att type="string" name="geneName" value="LOC100155727"/>
    <att type="string" name="id" value="100155727"/>
    <graphics type="ELLIPSE" h="40.0" w="40.0" x="2251.542236328125" y="1242.5252685546875" fill="#ccccff" width="1" outline="#666666" cy:nodeTransparency="1.0" cy:nodeLabelFont="SansSerif.bold-0-12" cy:nodeLabel="LOC100155727" cy:borderLineType="solid"/>
  </node>
  <node label="100521261" id="-566">
    <att type="string" name="canonicalName" value="100521261"/>
    <att type="list" name="cytoscape.alias.list">
      <att type="string" name="cytoscape.alias.list" value="100521261"/>
    </att>
    <att type="string" name="geneName" value="LOC100521261"/>
    <att type="string" name="id" value="100521261"/>
    <graphics type="ELLIPSE" h="40.0" w="40.0" x="2230.30615234375" y="1449.71875" fill="#ccccff" width="1" outline="#666666" cy:nodeTransparency="1.0" cy:nodeLabelFont="SansSerif.bold-0-12" cy:nodeLabel="LOC100521261" cy:borderLineType="solid"/>
  </node>
  <node label="100521623" id="-565">
    <att type="string" name="canonicalName" value="100521623"/>
    <att type="list" name="cytoscape.alias.list">
      <att type="string" name="cytoscape.alias.list" value="100521623"/>
    </att>
    <att type="string" name="geneName" value="POLR3B"/>
    <att type="string" name="id" value="100521623"/>
    <graphics type="ELLIPSE" h="40.0" w="40.0" x="2534.5830078125" y="1268.40283203125" fill="#ccccff" width="1" outline="#666666" cy:nodeTransparency="1.0" cy:nodeLabelFont="SansSerif.bold-0-12" cy:nodeLabel="POLR3B" cy:borderLineType="solid"/>
  </node>
  <node label="100520587" id="-564">
    <att type="string" name="canonicalName" value="100520587"/>
    <att type="list" name="cytoscape.alias.list">
      <att type="string" name="cytoscape.alias.list" value="100520587"/>
    </att>
    <att type="string" name="geneName" value="LOC100520587"/>
    <att type="string" name="id" value="100520587"/>
    <graphics type="ELLIPSE" h="40.0" w="40.0" x="2450.21826171875" y="1384.154296875" fill="#ccccff" width="1" outline="#666666" cy:nodeTransparency="1.0" cy:nodeLabelFont="SansSerif.bold-0-12" cy:nodeLabel="LOC100520587" cy:borderLineType="solid"/>
  </node>
  <node label="100514398" id="-563">
    <att type="string" name="canonicalName" value="100514398"/>
    <att type="list" name="cytoscape.alias.list">
      <att type="string" name="cytoscape.alias.list" value="100514398"/>
    </att>
    <att type="string" name="geneName" value="NME3"/>
    <att type="string" name="id" value="100514398"/>
    <graphics type="ELLIPSE" h="40.0" w="40.0" x="1990.2027587890625" y="1154.4022216796875" fill="#ccccff" width="1" outline="#666666" cy:nodeTransparency="1.0" cy:nodeLabelFont="SansSerif.bold-0-12" cy:nodeLabel="NME3" cy:borderLineType="solid"/>
  </node>
  <node label="100525976" id="-562">
    <att type="string" name="canonicalName" value="100525976"/>
    <att type="list" name="cytoscape.alias.list">
      <att type="string" name="cytoscape.alias.list" value="100525976"/>
    </att>
    <att type="string" name="geneName" value="LOC100525976"/>
    <att type="string" name="id" value="100525976"/>
    <graphics type="ELLIPSE" h="40.0" w="40.0" x="207.88772583007812" y="6780.95166015625" fill="#ccccff" width="1" outline="#666666" cy:nodeTransparency="1.0" cy:nodeLabelFont="SansSerif.bold-0-12" cy:nodeLabel="LOC100525976" cy:borderLineType="solid"/>
  </node>
  <node label="100522709" id="-561">
    <att type="string" name="canonicalName" value="100522709"/>
    <att type="list" name="cytoscape.alias.list">
      <att type="string" name="cytoscape.alias.list" value="100522709"/>
    </att>
    <att type="string" name="geneName" value="LOC100522709"/>
    <att type="string" name="id" value="100522709"/>
    <graphics type="ELLIPSE" h="40.0" w="40.0" x="205.37216186523438" y="6888.68701171875" fill="#ccccff" width="1" outline="#666666" cy:nodeTransparency="1.0" cy:nodeLabelFont="SansSerif.bold-0-12" cy:nodeLabel="LOC100522709" cy:borderLineType="solid"/>
  </node>
  <node label="100524934" id="-560">
    <att type="string" name="canonicalName" value="100524934"/>
    <att type="list" name="cytoscape.alias.list">
      <att type="string" name="cytoscape.alias.list" value="100524934"/>
    </att>
    <att type="string" name="geneName" value="LOC100524934"/>
    <att type="string" name="id" value="100524934"/>
    <graphics type="ELLIPSE" h="40.0" w="40.0" x="2093.459228515625" y="1384.77001953125" fill="#ccccff" width="1" outline="#666666" cy:nodeTransparency="1.0" cy:nodeLabelFont="SansSerif.bold-0-12" cy:nodeLabel="LOC100524934" cy:borderLineType="solid"/>
  </node>
  <node label="100155691" id="-559">
    <att type="string" name="canonicalName" value="100155691"/>
    <att type="list" name="cytoscape.alias.list">
      <att type="string" name="cytoscape.alias.list" value="100155691"/>
    </att>
    <att type="string" name="geneName" value="AK3L1"/>
    <att type="string" name="id" value="100155691"/>
    <graphics type="ELLIPSE" h="40.0" w="40.0" x="2379.929931640625" y="1189.3533935546875" fill="#ccccff" width="1" outline="#666666" cy:nodeTransparency="1.0" cy:nodeLabelFont="SansSerif.bold-0-12" cy:nodeLabel="AK3L1" cy:borderLineType="solid"/>
  </node>
  <node label="397577" id="-558">
    <att type="string" name="canonicalName" value="397577"/>
    <att type="list" name="cytoscape.alias.list">
      <att type="string" name="cytoscape.alias.list" value="397577"/>
    </att>
    <att type="string" name="geneName" value="NUDT2"/>
    <att type="string" name="id" value="397577"/>
    <graphics type="ELLIPSE" h="40.0" w="40.0" x="2287.6875" y="1360.0472412109375" fill="#ccccff" width="1" outline="#666666" cy:nodeTransparency="1.0" cy:nodeLabelFont="SansSerif.bold-0-12" cy:nodeLabel="NUDT2" cy:borderLineType="solid"/>
  </node>
  <node label="100152157" id="-557">
    <att type="string" name="canonicalName" value="100152157"/>
    <att type="list" name="cytoscape.alias.list">
      <att type="string" name="cytoscape.alias.list" value="100152157"/>
    </att>
    <att type="string" name="geneName" value="POLR3GL"/>
    <att type="string" name="id" value="100152157"/>
    <graphics type="ELLIPSE" h="40.0" w="40.0" x="2316.29052734375" y="1249.150390625" fill="#ccccff" width="1" outline="#666666" cy:nodeTransparency="1.0" cy:nodeLabelFont="SansSerif.bold-0-12" cy:nodeLabel="POLR3GL" cy:borderLineType="solid"/>
  </node>
  <node label="100515619" id="-556">
    <att type="string" name="canonicalName" value="100515619"/>
    <att type="list" name="cytoscape.alias.list">
      <att type="string" name="cytoscape.alias.list" value="100515619"/>
    </att>
    <att type="string" name="geneName" value="LOC100515619"/>
    <att type="string" name="id" value="100515619"/>
    <graphics type="ELLIPSE" h="40.0" w="40.0" x="2256.437255859375" y="1647.2890625" fill="#ccccff" width="1" outline="#666666" cy:nodeTransparency="1.0" cy:nodeLabelFont="SansSerif.bold-0-12" cy:nodeLabel="LOC100515619" cy:borderLineType="solid"/>
  </node>
  <node label="100152763" id="-555">
    <att type="string" name="canonicalName" value="100152763"/>
    <att type="list" name="cytoscape.alias.list">
      <att type="string" name="cytoscape.alias.list" value="100152763"/>
    </att>
    <att type="string" name="geneName" value="LOC100152763"/>
    <att type="string" name="id" value="100152763"/>
    <graphics type="ELLIPSE" h="40.0" w="40.0" x="2314.7646484375" y="1510.454345703125" fill="#ccccff" width="1" outline="#666666" cy:nodeTransparency="1.0" cy:nodeLabelFont="SansSerif.bold-0-12" cy:nodeLabel="LOC100152763" cy:borderLineType="solid"/>
  </node>
  <node label="100626052" id="-554">
    <att type="string" name="canonicalName" value="100626052"/>
    <att type="list" name="cytoscape.alias.list">
      <att type="string" name="cytoscape.alias.list" value="100626052"/>
    </att>
    <att type="string" name="geneName" value="POLD3"/>
    <att type="string" name="id" value="100626052"/>
    <graphics type="ELLIPSE" h="40.0" w="40.0" x="2489.517822265625" y="1560.9940185546875" fill="#ccccff" width="1" outline="#666666" cy:nodeTransparency="1.0" cy:nodeLabelFont="SansSerif.bold-0-12" cy:nodeLabel="POLD3" cy:borderLineType="solid"/>
  </node>
  <node label="100524560" id="-553">
    <att type="string" name="canonicalName" value="100524560"/>
    <att type="list" name="cytoscape.alias.list">
      <att type="string" name="cytoscape.alias.list" value="100524560"/>
    </att>
    <att type="string" name="geneName" value="LOC100524560"/>
    <att type="string" name="id" value="100524560"/>
    <graphics type="ELLIPSE" h="40.0" w="40.0" x="2289.67138671875" y="1461.346435546875" fill="#ccccff" width="1" outline="#666666" cy:nodeTransparency="1.0" cy:nodeLabelFont="SansSerif.bold-0-12" cy:nodeLabel="LOC100524560" cy:borderLineType="solid"/>
  </node>
  <node label="100621441" id="-552">
    <att type="string" name="canonicalName" value="100621441"/>
    <att type="list" name="cytoscape.alias.list">
      <att type="string" name="cytoscape.alias.list" value="100621441"/>
    </att>
    <att type="string" name="geneName" value="LOC100621441"/>
    <att type="string" name="id" value="100621441"/>
    <graphics type="ELLIPSE" h="40.0" w="40.0" x="2461.606689453125" y="1316.474365234375" fill="#ccccff" width="1" outline="#666666" cy:nodeTransparency="1.0" cy:nodeLabelFont="SansSerif.bold-0-12" cy:nodeLabel="LOC100621441" cy:borderLineType="solid"/>
  </node>
  <node label="414414" id="-551">
    <att type="string" name="canonicalName" value="414414"/>
    <att type="list" name="cytoscape.alias.list">
      <att type="string" name="cytoscape.alias.list" value="414414"/>
    </att>
    <att type="string" name="geneName" value="RPA39"/>
    <att type="string" name="id" value="414414"/>
    <graphics type="ELLIPSE" h="40.0" w="40.0" x="2158.7724609375" y="1389.620849609375" fill="#ccccff" width="1" outline="#666666" cy:nodeTransparency="1.0" cy:nodeLabelFont="SansSerif.bold-0-12" cy:nodeLabel="RPA39" cy:borderLineType="solid"/>
  </node>
  <node label="100151798" id="-550">
    <att type="string" name="canonicalName" value="100151798"/>
    <att type="list" name="cytoscape.alias.list">
      <att type="string" name="cytoscape.alias.list" value="100151798"/>
    </att>
    <att type="string" name="geneName" value="UPRT"/>
    <att type="string" name="id" value="100151798"/>
    <graphics type="ELLIPSE" h="40.0" w="40.0" x="1540.1865234375" y="1880.38134765625" fill="#ccccff" width="1" outline="#666666" cy:nodeTransparency="1.0" cy:nodeLabelFont="SansSerif.bold-0-12" cy:nodeLabel="UPRT" cy:borderLineType="solid"/>
  </node>
  <node label="100154612" id="-549">
    <att type="string" name="canonicalName" value="100154612"/>
    <att type="list" name="cytoscape.alias.list">
      <att type="string" name="cytoscape.alias.list" value="100154612"/>
    </att>
    <att type="string" name="geneName" value="LOC100154612"/>
    <att type="string" name="id" value="100154612"/>
    <graphics type="ELLIPSE" h="40.0" w="40.0" x="1657.8287353515625" y="1769.344482421875" fill="#ccccff" width="1" outline="#666666" cy:nodeTransparency="1.0" cy:nodeLabelFont="SansSerif.bold-0-12" cy:nodeLabel="LOC100154612" cy:borderLineType="solid"/>
  </node>
  <node label="100511241" id="-548">
    <att type="string" name="canonicalName" value="100511241"/>
    <att type="list" name="cytoscape.alias.list">
      <att type="string" name="cytoscape.alias.list" value="100511241"/>
    </att>
    <att type="string" name="geneName" value="LOC100511241"/>
    <att type="string" name="id" value="100511241"/>
    <graphics type="ELLIPSE" h="40.0" w="40.0" x="2430.0927734375" y="1137.938720703125" fill="#ccccff" width="1" outline="#666666" cy:nodeTransparency="1.0" cy:nodeLabelFont="SansSerif.bold-0-12" cy:nodeLabel="LOC100511241" cy:borderLineType="solid"/>
  </node>
  <node label="100233195" id="-547">
    <att type="string" name="canonicalName" value="100233195"/>
    <att type="list" name="cytoscape.alias.list">
      <att type="string" name="cytoscape.alias.list" value="100233195"/>
    </att>
    <att type="string" name="geneName" value="NME4"/>
    <att type="string" name="id" value="100233195"/>
    <graphics type="ELLIPSE" h="40.0" w="40.0" x="2364.84228515625" y="1025.859130859375" fill="#ccccff" width="1" outline="#666666" cy:nodeTransparency="1.0" cy:nodeLabelFont="SansSerif.bold-0-12" cy:nodeLabel="NME4" cy:borderLineType="solid"/>
  </node>
  <node label="100152094" id="-546">
    <att type="string" name="canonicalName" value="100152094"/>
    <att type="list" name="cytoscape.alias.list">
      <att type="string" name="cytoscape.alias.list" value="100152094"/>
    </att>
    <att type="string" name="geneName" value="ZNRD1"/>
    <att type="string" name="id" value="100152094"/>
    <graphics type="ELLIPSE" h="40.0" w="40.0" x="2436.511474609375" y="1482.989990234375" fill="#ccccff" width="1" outline="#666666" cy:nodeTransparency="1.0" cy:nodeLabelFont="SansSerif.bold-0-12" cy:nodeLabel="ZNRD1" cy:borderLineType="solid"/>
  </node>
  <node label="100737579" id="-545">
    <att type="string" name="canonicalName" value="100737579"/>
    <att type="list" name="cytoscape.alias.list">
      <att type="string" name="cytoscape.alias.list" value="100737579"/>
    </att>
    <att type="string" name="geneName" value="LOC100737579"/>
    <att type="string" name="id" value="100737579"/>
    <graphics type="ELLIPSE" h="40.0" w="40.0" x="2325.903564453125" y="1201.864990234375" fill="#ccccff" width="1" outline="#666666" cy:nodeTransparency="1.0" cy:nodeLabelFont="SansSerif.bold-0-12" cy:nodeLabel="LOC100737579" cy:borderLineType="solid"/>
  </node>
  <node label="100157995" id="-544">
    <att type="string" name="canonicalName" value="100157995"/>
    <att type="list" name="cytoscape.alias.list">
      <att type="string" name="cytoscape.alias.list" value="100157995"/>
    </att>
    <att type="string" name="geneName" value="LOC100157995"/>
    <att type="string" name="id" value="100157995"/>
    <graphics type="ELLIPSE" h="40.0" w="40.0" x="1978.024658203125" y="1470.941650390625" fill="#ccccff" width="1" outline="#666666" cy:nodeTransparency="1.0" cy:nodeLabelFont="SansSerif.bold-0-12" cy:nodeLabel="LOC100157995" cy:borderLineType="solid"/>
  </node>
  <node label="100519356" id="-543">
    <att type="string" name="canonicalName" value="100519356"/>
    <att type="list" name="cytoscape.alias.list">
      <att type="string" name="cytoscape.alias.list" value="100519356"/>
    </att>
    <att type="string" name="geneName" value="LOC100519356"/>
    <att type="string" name="id" value="100519356"/>
    <graphics type="ELLIPSE" h="40.0" w="40.0" x="2342.546630859375" y="1548.19921875" fill="#ccccff" width="1" outline="#666666" cy:nodeTransparency="1.0" cy:nodeLabelFont="SansSerif.bold-0-12" cy:nodeLabel="LOC100519356" cy:borderLineType="solid"/>
  </node>
  <node label="414403" id="-542">
    <att type="string" name="canonicalName" value="414403"/>
    <att type="list" name="cytoscape.alias.list">
      <att type="string" name="cytoscape.alias.list" value="414403"/>
    </att>
    <att type="string" name="geneName" value="POLR2I"/>
    <att type="string" name="id" value="414403"/>
    <graphics type="ELLIPSE" h="40.0" w="40.0" x="1953.8016357421875" y="1294.551025390625" fill="#ccccff" width="1" outline="#666666" cy:nodeTransparency="1.0" cy:nodeLabelFont="SansSerif.bold-0-12" cy:nodeLabel="POLR2I" cy:borderLineType="solid"/>
  </node>
  <node label="733683" id="-541">
    <att type="string" name="canonicalName" value="733683"/>
    <att type="list" name="cytoscape.alias.list">
      <att type="string" name="cytoscape.alias.list" value="733683"/>
    </att>
    <att type="string" name="geneName" value="NME2"/>
    <att type="string" name="id" value="733683"/>
    <graphics type="ELLIPSE" h="40.0" w="40.0" x="2034.468017578125" y="1440.10693359375" fill="#ccccff" width="1" outline="#666666" cy:nodeTransparency="1.0" cy:nodeLabelFont="SansSerif.bold-0-12" cy:nodeLabel="NME2" cy:borderLineType="solid"/>
  </node>
  <node label="100737214" id="-540">
    <att type="string" name="canonicalName" value="100737214"/>
    <att type="list" name="cytoscape.alias.list">
      <att type="string" name="cytoscape.alias.list" value="100737214"/>
    </att>
    <att type="string" name="geneName" value="LOC100737214"/>
    <att type="string" name="id" value="100737214"/>
    <graphics type="ELLIPSE" h="40.0" w="40.0" x="2177.336669921875" y="1271.932373046875" fill="#ccccff" width="1" outline="#666666" cy:nodeTransparency="1.0" cy:nodeLabelFont="SansSerif.bold-0-12" cy:nodeLabel="LOC100737214" cy:borderLineType="solid"/>
  </node>
  <node label="100157033" id="-539">
    <att type="string" name="canonicalName" value="100157033"/>
    <att type="list" name="cytoscape.alias.list">
      <att type="string" name="cytoscape.alias.list" value="100157033"/>
    </att>
    <att type="string" name="geneName" value="POLR3H"/>
    <att type="string" name="id" value="100157033"/>
    <graphics type="ELLIPSE" h="40.0" w="40.0" x="2051.0615234375" y="1120.466064453125" fill="#ccccff" width="1" outline="#666666" cy:nodeTransparency="1.0" cy:nodeLabelFont="SansSerif.bold-0-12" cy:nodeLabel="POLR3H" cy:borderLineType="solid"/>
  </node>
  <node label="100642182" id="-538">
    <att type="string" name="canonicalName" value="100642182"/>
    <att type="list" name="cytoscape.alias.list">
      <att type="string" name="cytoscape.alias.list" value="100642182"/>
    </att>
    <att type="string" name="geneName" value="PNPT1"/>
    <att type="string" name="id" value="100642182"/>
    <graphics type="ELLIPSE" h="40.0" w="40.0" x="2204.79541015625" y="1146.930419921875" fill="#ccccff" width="1" outline="#666666" cy:nodeTransparency="1.0" cy:nodeLabelFont="SansSerif.bold-0-12" cy:nodeLabel="PNPT1" cy:borderLineType="solid"/>
  </node>
  <node label="100623872" id="-537">
    <att type="string" name="canonicalName" value="100623872"/>
    <att type="list" name="cytoscape.alias.list">
      <att type="string" name="cytoscape.alias.list" value="100623872"/>
    </att>
    <att type="string" name="geneName" value="LOC100623872"/>
    <att type="string" name="id" value="100623872"/>
    <graphics type="ELLIPSE" h="40.0" w="40.0" x="2212.971435546875" y="1385.6182861328125" fill="#ccccff" width="1" outline="#666666" cy:nodeTransparency="1.0" cy:nodeLabelFont="SansSerif.bold-0-12" cy:nodeLabel="LOC100623872" cy:borderLineType="solid"/>
  </node>
  <node label="100517907" id="-536">
    <att type="string" name="canonicalName" value="100517907"/>
    <att type="list" name="cytoscape.alias.list">
      <att type="string" name="cytoscape.alias.list" value="100517907"/>
    </att>
    <att type="string" name="geneName" value="TWISTNB"/>
    <att type="string" name="id" value="100517907"/>
    <graphics type="ELLIPSE" h="40.0" w="40.0" x="2412.92626953125" y="1570.6617431640625" fill="#ccccff" width="1" outline="#666666" cy:nodeTransparency="1.0" cy:nodeLabelFont="SansSerif.bold-0-12" cy:nodeLabel="TWISTNB" cy:borderLineType="solid"/>
  </node>
  <node label="100154836" id="-535">
    <att type="string" name="canonicalName" value="100154836"/>
    <att type="list" name="cytoscape.alias.list">
      <att type="string" name="cytoscape.alias.list" value="100154836"/>
    </att>
    <att type="string" name="geneName" value="LOC100154836"/>
    <att type="string" name="id" value="100154836"/>
    <graphics type="ELLIPSE" h="40.0" w="40.0" x="1612.0517578125" y="1892.705322265625" fill="#ccccff" width="1" outline="#666666" cy:nodeTransparency="1.0" cy:nodeLabelFont="SansSerif.bold-0-12" cy:nodeLabel="LOC100154836" cy:borderLineType="solid"/>
  </node>
  <node label="100623333" id="-534">
    <att type="string" name="canonicalName" value="100623333"/>
    <att type="list" name="cytoscape.alias.list">
      <att type="string" name="cytoscape.alias.list" value="100623333"/>
    </att>
    <att type="string" name="geneName" value="LOC100623333"/>
    <att type="string" name="id" value="100623333"/>
    <graphics type="ELLIPSE" h="40.0" w="40.0" x="2346.746337890625" y="1479.6038818359375" fill="#ccccff" width="1" outline="#666666" cy:nodeTransparency="1.0" cy:nodeLabelFont="SansSerif.bold-0-12" cy:nodeLabel="LOC100623333" cy:borderLineType="solid"/>
  </node>
  <node label="100738796" id="-533">
    <att type="string" name="canonicalName" value="100738796"/>
    <att type="list" name="cytoscape.alias.list">
      <att type="string" name="cytoscape.alias.list" value="100738796"/>
    </att>
    <att type="string" name="geneName" value="POLR3F"/>
    <att type="string" name="id" value="100738796"/>
    <graphics type="ELLIPSE" h="40.0" w="40.0" x="2201.20263671875" y="993.6534423828125" fill="#ccccff" width="1" outline="#666666" cy:nodeTransparency="1.0" cy:nodeLabelFont="SansSerif.bold-0-12" cy:nodeLabel="POLR3F" cy:borderLineType="solid"/>
  </node>
  <node label="100518066" id="-532">
    <att type="string" name="canonicalName" value="100518066"/>
    <att type="list" name="cytoscape.alias.list">
      <att type="string" name="cytoscape.alias.list" value="100518066"/>
    </att>
    <att type="string" name="geneName" value="POLR1A"/>
    <att type="string" name="id" value="100518066"/>
    <graphics type="ELLIPSE" h="40.0" w="40.0" x="2249.885986328125" y="1300.5020751953125" fill="#ccccff" width="1" outline="#666666" cy:nodeTransparency="1.0" cy:nodeLabelFont="SansSerif.bold-0-12" cy:nodeLabel="POLR1A" cy:borderLineType="solid"/>
  </node>
  <node label="100514809" id="-531">
    <att type="string" name="canonicalName" value="100514809"/>
    <att type="list" name="cytoscape.alias.list">
      <att type="string" name="cytoscape.alias.list" value="100514809"/>
    </att>
    <att type="string" name="geneName" value="POLD2"/>
    <att type="string" name="id" value="100514809"/>
    <graphics type="ELLIPSE" h="40.0" w="40.0" x="2340.987548828125" y="1297.5699462890625" fill="#ccccff" width="1" outline="#666666" cy:nodeTransparency="1.0" cy:nodeLabelFont="SansSerif.bold-0-12" cy:nodeLabel="POLD2" cy:borderLineType="solid"/>
  </node>
  <node label="100736957" id="-530">
    <att type="string" name="canonicalName" value="100736957"/>
    <att type="list" name="cytoscape.alias.list">
      <att type="string" name="cytoscape.alias.list" value="100736957"/>
    </att>
    <att type="string" name="geneName" value="LOC100736957"/>
    <att type="string" name="id" value="100736957"/>
    <graphics type="ELLIPSE" h="40.0" w="40.0" x="2572.3291015625" y="1444.6282958984375" fill="#ccccff" width="1" outline="#666666" cy:nodeTransparency="1.0" cy:nodeLabelFont="SansSerif.bold-0-12" cy:nodeLabel="LOC100736957" cy:borderLineType="solid"/>
  </node>
  <node label="100523894" id="-529">
    <att type="string" name="canonicalName" value="100523894"/>
    <att type="list" name="cytoscape.alias.list">
      <att type="string" name="cytoscape.alias.list" value="100523894"/>
    </att>
    <att type="string" name="geneName" value="POLR3E"/>
    <att type="string" name="id" value="100523894"/>
    <graphics type="ELLIPSE" h="40.0" w="40.0" x="2343.2294921875" y="1431.875732421875" fill="#ccccff" width="1" outline="#666666" cy:nodeTransparency="1.0" cy:nodeLabelFont="SansSerif.bold-0-12" cy:nodeLabel="POLR3E" cy:borderLineType="solid"/>
  </node>
  <node label="100521651" id="-528">
    <att type="string" name="canonicalName" value="100521651"/>
    <att type="list" name="cytoscape.alias.list">
      <att type="string" name="cytoscape.alias.list" value="100521651"/>
    </att>
    <att type="string" name="geneName" value="LOC100521651"/>
    <att type="string" name="id" value="100521651"/>
    <graphics type="ELLIPSE" h="40.0" w="40.0" x="2586.631591796875" y="1341.212158203125" fill="#ccccff" width="1" outline="#666666" cy:nodeTransparency="1.0" cy:nodeLabelFont="SansSerif.bold-0-12" cy:nodeLabel="LOC100521651" cy:borderLineType="solid"/>
  </node>
  <node label="100525117" id="-527">
    <att type="string" name="canonicalName" value="100525117"/>
    <att type="list" name="cytoscape.alias.list">
      <att type="string" name="cytoscape.alias.list" value="100525117"/>
    </att>
    <att type="string" name="geneName" value="RRM1"/>
    <att type="string" name="id" value="100525117"/>
    <graphics type="ELLIPSE" h="40.0" w="40.0" x="2414.78466796875" y="1356.3590087890625" fill="#ccccff" width="1" outline="#666666" cy:nodeTransparency="1.0" cy:nodeLabelFont="SansSerif.bold-0-12" cy:nodeLabel="RRM1" cy:borderLineType="solid"/>
  </node>
  <node label="100517151" id="-526">
    <att type="string" name="canonicalName" value="100517151"/>
    <att type="list" name="cytoscape.alias.list">
      <att type="string" name="cytoscape.alias.list" value="100517151"/>
    </att>
    <att type="string" name="geneName" value="POLR1B"/>
    <att type="string" name="id" value="100517151"/>
    <graphics type="ELLIPSE" h="40.0" w="40.0" x="2110.932861328125" y="1563.113037109375" fill="#ccccff" width="1" outline="#666666" cy:nodeTransparency="1.0" cy:nodeLabelFont="SansSerif.bold-0-12" cy:nodeLabel="POLR1B" cy:borderLineType="solid"/>
  </node>
  <node label="100156229" id="-525">
    <att type="string" name="canonicalName" value="100156229"/>
    <att type="list" name="cytoscape.alias.list">
      <att type="string" name="cytoscape.alias.list" value="100156229"/>
    </att>
    <att type="string" name="geneName" value="LOC100156229"/>
    <att type="string" name="id" value="100156229"/>
    <graphics type="ELLIPSE" h="40.0" w="40.0" x="2415.86669921875" y="1636.896484375" fill="#ccccff" width="1" outline="#666666" cy:nodeTransparency="1.0" cy:nodeLabelFont="SansSerif.bold-0-12" cy:nodeLabel="LOC100156229" cy:borderLineType="solid"/>
  </node>
  <node label="100155254" id="-524">
    <att type="string" name="canonicalName" value="100155254"/>
    <att type="list" name="cytoscape.alias.list">
      <att type="string" name="cytoscape.alias.list" value="100155254"/>
    </att>
    <att type="string" name="geneName" value="ENTPD4"/>
    <att type="string" name="id" value="100155254"/>
    <graphics type="ELLIPSE" h="40.0" w="40.0" x="2158.6904296875" y="1505.284423828125" fill="#ccccff" width="1" outline="#666666" cy:nodeTransparency="1.0" cy:nodeLabelFont="SansSerif.bold-0-12" cy:nodeLabel="ENTPD4" cy:borderLineType="solid"/>
  </node>
  <node label="100156829" id="-523">
    <att type="string" name="canonicalName" value="100156829"/>
    <att type="list" name="cytoscape.alias.list">
      <att type="string" name="cytoscape.alias.list" value="100156829"/>
    </att>
    <att type="string" name="geneName" value="PRIM2"/>
    <att type="string" name="id" value="100156829"/>
    <graphics type="ELLIPSE" h="40.0" w="40.0" x="1928.90283203125" y="1220.031494140625" fill="#ccccff" width="1" outline="#666666" cy:nodeTransparency="1.0" cy:nodeLabelFont="SansSerif.bold-0-12" cy:nodeLabel="PRIM2" cy:borderLineType="solid"/>
  </node>
  <node label="100155015" id="-522">
    <att type="string" name="canonicalName" value="100155015"/>
    <att type="list" name="cytoscape.alias.list">
      <att type="string" name="cytoscape.alias.list" value="100155015"/>
    </att>
    <att type="string" name="geneName" value="ITPR3"/>
    <att type="string" name="id" value="100155015"/>
    <graphics type="ELLIPSE" h="40.0" w="40.0" x="1866.1474609375" y="2989.60498046875" fill="#ccccff" width="1" outline="#666666" cy:nodeTransparency="1.0" cy:nodeLabelFont="SansSerif.bold-0-12" cy:nodeLabel="ITPR3" cy:borderLineType="solid"/>
  </node>
  <node label="100739348" id="-521">
    <att type="string" name="canonicalName" value="100739348"/>
    <att type="list" name="cytoscape.alias.list">
      <att type="string" name="cytoscape.alias.list" value="100739348"/>
    </att>
    <att type="string" name="geneName" value="LOC100739348"/>
    <att type="string" name="id" value="100739348"/>
    <graphics type="ELLIPSE" h="40.0" w="40.0" x="1955.57275390625" y="1877.51513671875" fill="#ccccff" width="1" outline="#666666" cy:nodeTransparency="1.0" cy:nodeLabelFont="SansSerif.bold-0-12" cy:nodeLabel="LOC100739348" cy:borderLineType="solid"/>
  </node>
  <node label="397394" id="-520">
    <att type="string" name="canonicalName" value="397394"/>
    <att type="list" name="cytoscape.alias.list">
      <att type="string" name="cytoscape.alias.list" value="397394"/>
    </att>
    <att type="string" name="geneName" value="CAMK2G"/>
    <att type="string" name="id" value="397394"/>
    <graphics type="ELLIPSE" h="40.0" w="40.0" x="1168.903076171875" y="1715.474365234375" fill="#ccccff" width="1" outline="#666666" cy:nodeTransparency="1.0" cy:nodeLabelFont="SansSerif.bold-0-12" cy:nodeLabel="CAMK2G" cy:borderLineType="solid"/>
  </node>
  <node label="733612" id="-519">
    <att type="string" name="canonicalName" value="733612"/>
    <att type="list" name="cytoscape.alias.list">
      <att type="string" name="cytoscape.alias.list" value="733612"/>
    </att>
    <att type="string" name="geneName" value="LOC733612"/>
    <att type="string" name="id" value="733612"/>
    <graphics type="ELLIPSE" h="40.0" w="40.0" x="1309.697998046875" y="1769.2080078125" fill="#ccccff" width="1" outline="#666666" cy:nodeTransparency="1.0" cy:nodeLabelFont="SansSerif.bold-0-12" cy:nodeLabel="LOC733612" cy:borderLineType="solid"/>
  </node>
  <node label="100153199" id="-518">
    <att type="string" name="canonicalName" value="100153199"/>
    <att type="list" name="cytoscape.alias.list">
      <att type="string" name="cytoscape.alias.list" value="100153199"/>
    </att>
    <att type="string" name="geneName" value="RAP1A"/>
    <att type="string" name="id" value="100153199"/>
    <graphics type="ELLIPSE" h="40.0" w="40.0" x="2466.73583984375" y="1910.9486083984375" fill="#ccccff" width="1" outline="#666666" cy:nodeTransparency="1.0" cy:nodeLabelFont="SansSerif.bold-0-12" cy:nodeLabel="RAP1A" cy:borderLineType="solid"/>
  </node>
  <node label="396838" id="-517">
    <att type="string" name="canonicalName" value="396838"/>
    <att type="list" name="cytoscape.alias.list">
      <att type="string" name="cytoscape.alias.list" value="396838"/>
    </att>
    <att type="string" name="geneName" value="CALM3"/>
    <att type="string" name="id" value="396838"/>
    <graphics type="ELLIPSE" h="40.0" w="40.0" x="2507.865966796875" y="2678.921875" fill="#ccccff" width="1" outline="#666666" cy:nodeTransparency="1.0" cy:nodeLabelFont="SansSerif.bold-0-12" cy:nodeLabel="CALM3" cy:borderLineType="solid"/>
  </node>
  <node label="100518251" id="-516">
    <att type="string" name="canonicalName" value="100518251"/>
    <att type="list" name="cytoscape.alias.list">
      <att type="string" name="cytoscape.alias.list" value="100518251"/>
    </att>
    <att type="string" name="geneName" value="LOC100518251"/>
    <att type="string" name="id" value="100518251"/>
    <graphics type="ELLIPSE" h="40.0" w="40.0" x="2552.266845703125" y="2501.181884765625" fill="#ccccff" width="1" outline="#666666" cy:nodeTransparency="1.0" cy:nodeLabelFont="SansSerif.bold-0-12" cy:nodeLabel="LOC100518251" cy:borderLineType="solid"/>
  </node>
  <node label="100626022" id="-515">
    <att type="string" name="canonicalName" value="100626022"/>
    <att type="list" name="cytoscape.alias.list">
      <att type="string" name="cytoscape.alias.list" value="100626022"/>
    </att>
    <att type="string" name="geneName" value="GRIN2B"/>
    <att type="string" name="id" value="100626022"/>
    <graphics type="ELLIPSE" h="40.0" w="40.0" x="2646.803955078125" y="2736.53076171875" fill="#ccccff" width="1" outline="#666666" cy:nodeTransparency="1.0" cy:nodeLabelFont="SansSerif.bold-0-12" cy:nodeLabel="GRIN2B" cy:borderLineType="solid"/>
  </node>
  <node label="100152555" id="-514">
    <att type="string" name="canonicalName" value="100152555"/>
    <att type="list" name="cytoscape.alias.list">
      <att type="string" name="cytoscape.alias.list" value="100152555"/>
    </att>
    <att type="string" name="geneName" value="LOC100152555"/>
    <att type="string" name="id" value="100152555"/>
    <graphics type="ELLIPSE" h="40.0" w="40.0" x="2412.066162109375" y="1926.7342529296875" fill="#ccccff" width="1" outline="#666666" cy:nodeTransparency="1.0" cy:nodeLabelFont="SansSerif.bold-0-12" cy:nodeLabel="LOC100152555" cy:borderLineType="solid"/>
  </node>
  <node label="397657" id="-513">
    <att type="string" name="canonicalName" value="397657"/>
    <att type="list" name="cytoscape.alias.list">
      <att type="string" name="cytoscape.alias.list" value="397657"/>
    </att>
    <att type="string" name="geneName" value="CTNNB1"/>
    <att type="string" name="id" value="397657"/>
    <graphics type="ELLIPSE" h="40.0" w="40.0" x="1235.6455078125" y="5748.6806640625" fill="#ccccff" width="1" outline="#666666" cy:nodeTransparency="1.0" cy:nodeLabelFont="SansSerif.bold-0-12" cy:nodeLabel="CTNNB1" cy:borderLineType="solid"/>
  </node>
  <node label="100523899" id="-512">
    <att type="string" name="canonicalName" value="100523899"/>
    <att type="list" name="cytoscape.alias.list">
      <att type="string" name="cytoscape.alias.list" value="100523899"/>
    </att>
    <att type="string" name="geneName" value="TCF7L1"/>
    <att type="string" name="id" value="100523899"/>
    <graphics type="ELLIPSE" h="40.0" w="40.0" x="1327.4134521484375" y="5687.19482421875" fill="#ccccff" width="1" outline="#666666" cy:nodeTransparency="1.0" cy:nodeLabelFont="SansSerif.bold-0-12" cy:nodeLabel="TCF7L1" cy:borderLineType="solid"/>
  </node>
  <node label="397592" id="-511">
    <att type="string" name="canonicalName" value="397592"/>
    <att type="list" name="cytoscape.alias.list">
      <att type="string" name="cytoscape.alias.list" value="397592"/>
    </att>
    <att type="string" name="geneName" value="JUP"/>
    <att type="string" name="id" value="397592"/>
    <graphics type="ELLIPSE" h="40.0" w="40.0" x="1422.1365966796875" y="5630.37060546875" fill="#ccccff" width="1" outline="#666666" cy:nodeTransparency="1.0" cy:nodeLabelFont="SansSerif.bold-0-12" cy:nodeLabel="JUP" cy:borderLineType="solid"/>
  </node>
  <node label="100624677" id="-510">
    <att type="string" name="canonicalName" value="100624677"/>
    <att type="list" name="cytoscape.alias.list">
      <att type="string" name="cytoscape.alias.list" value="100624677"/>
    </att>
    <att type="string" name="geneName" value="HNMT"/>
    <att type="string" name="id" value="100624677"/>
    <graphics type="ELLIPSE" h="40.0" w="40.0" x="569.118408203125" y="4628.6376953125" fill="#ccccff" width="1" outline="#666666" cy:nodeTransparency="1.0" cy:nodeLabelFont="SansSerif.bold-0-12" cy:nodeLabel="HNMT" cy:borderLineType="solid"/>
  </node>
  <node label="100517369" id="-509">
    <att type="string" name="canonicalName" value="100517369"/>
    <att type="list" name="cytoscape.alias.list">
      <att type="string" name="cytoscape.alias.list" value="100517369"/>
    </att>
    <att type="string" name="geneName" value="METTL6"/>
    <att type="string" name="id" value="100517369"/>
    <graphics type="ELLIPSE" h="40.0" w="40.0" x="717.3008422851562" y="4459.28369140625" fill="#ccccff" width="1" outline="#666666" cy:nodeTransparency="1.0" cy:nodeLabelFont="SansSerif.bold-0-12" cy:nodeLabel="METTL6" cy:borderLineType="solid"/>
  </node>
  <node label="100520822" id="-508">
    <att type="string" name="canonicalName" value="100520822"/>
    <att type="list" name="cytoscape.alias.list">
      <att type="string" name="cytoscape.alias.list" value="100520822"/>
    </att>
    <att type="string" name="geneName" value="LOC100520822"/>
    <att type="string" name="id" value="100520822"/>
    <graphics type="ELLIPSE" h="40.0" w="40.0" x="679.5540161132812" y="6396.03955078125" fill="#ccccff" width="1" outline="#666666" cy:nodeTransparency="1.0" cy:nodeLabelFont="SansSerif.bold-0-12" cy:nodeLabel="LOC100520822" cy:borderLineType="solid"/>
  </node>
  <node label="100153896" id="-507">
    <att type="string" name="canonicalName" value="100153896"/>
    <att type="list" name="cytoscape.alias.list">
      <att type="string" name="cytoscape.alias.list" value="100153896"/>
    </att>
    <att type="string" name="geneName" value="FLAD1"/>
    <att type="string" name="id" value="100153896"/>
    <graphics type="ELLIPSE" h="40.0" w="40.0" x="772.76123046875" y="6338.7607421875" fill="#ccccff" width="1" outline="#666666" cy:nodeTransparency="1.0" cy:nodeLabelFont="SansSerif.bold-0-12" cy:nodeLabel="FLAD1" cy:borderLineType="solid"/>
  </node>
  <node label="100737301" id="-506">
    <att type="string" name="canonicalName" value="100737301"/>
    <att type="list" name="cytoscape.alias.list">
      <att type="string" name="cytoscape.alias.list" value="100737301"/>
    </att>
    <att type="string" name="geneName" value="LOC100737301"/>
    <att type="string" name="id" value="100737301"/>
    <graphics type="ELLIPSE" h="40.0" w="40.0" x="864.6414184570312" y="6279.349609375" fill="#ccccff" width="1" outline="#666666" cy:nodeTransparency="1.0" cy:nodeLabelFont="SansSerif.bold-0-12" cy:nodeLabel="LOC100737301" cy:borderLineType="solid"/>
  </node>
  <node label="100512615" id="-505">
    <att type="string" name="canonicalName" value="100512615"/>
    <att type="list" name="cytoscape.alias.list">
      <att type="string" name="cytoscape.alias.list" value="100512615"/>
    </att>
    <att type="string" name="geneName" value="ADH1C"/>
    <att type="string" name="id" value="100512615"/>
    <graphics type="ELLIPSE" h="40.0" w="40.0" x="637.328125" y="4823.36572265625" fill="#ccccff" width="1" outline="#666666" cy:nodeTransparency="1.0" cy:nodeLabelFont="SansSerif.bold-0-12" cy:nodeLabel="ADH1C" cy:borderLineType="solid"/>
  </node>
  <node label="100155530" id="-504">
    <att type="string" name="canonicalName" value="100155530"/>
    <att type="list" name="cytoscape.alias.list">
      <att type="string" name="cytoscape.alias.list" value="100155530"/>
    </att>
    <att type="string" name="geneName" value="COMT"/>
    <att type="string" name="id" value="100155530"/>
    <graphics type="ELLIPSE" h="40.0" w="40.0" x="569.0615234375" y="4716.41162109375" fill="#ccccff" width="1" outline="#666666" cy:nodeTransparency="1.0" cy:nodeLabelFont="SansSerif.bold-0-12" cy:nodeLabel="COMT" cy:borderLineType="solid"/>
  </node>
  <node label="100512795" id="-503">
    <att type="string" name="canonicalName" value="100512795"/>
    <att type="list" name="cytoscape.alias.list">
      <att type="string" name="cytoscape.alias.list" value="100512795"/>
    </att>
    <att type="string" name="geneName" value="LOC100512795"/>
    <att type="string" name="id" value="100512795"/>
    <graphics type="ELLIPSE" h="40.0" w="40.0" x="543.8294067382812" y="4843.29736328125" fill="#ccccff" width="1" outline="#666666" cy:nodeTransparency="1.0" cy:nodeLabelFont="SansSerif.bold-0-12" cy:nodeLabel="LOC100512795" cy:borderLineType="solid"/>
  </node>
  <node label="407745" id="-502">
    <att type="string" name="canonicalName" value="407745"/>
    <att type="list" name="cytoscape.alias.list">
      <att type="string" name="cytoscape.alias.list" value="407745"/>
    </att>
    <att type="string" name="geneName" value="TYR"/>
    <att type="string" name="id" value="407745"/>
    <graphics type="ELLIPSE" h="40.0" w="40.0" x="1069.439208984375" y="4389.46728515625" fill="#ccccff" width="1" outline="#666666" cy:nodeTransparency="1.0" cy:nodeLabelFont="SansSerif.bold-0-12" cy:nodeLabel="TYR" cy:borderLineType="solid"/>
  </node>
  <node label="100513555" id="-501">
    <att type="string" name="canonicalName" value="100513555"/>
    <att type="list" name="cytoscape.alias.list">
      <att type="string" name="cytoscape.alias.list" value="100513555"/>
    </att>
    <att type="string" name="geneName" value="ADH5"/>
    <att type="string" name="id" value="100513555"/>
    <graphics type="ELLIPSE" h="40.0" w="40.0" x="365.34576416015625" y="4532.134765625" fill="#ccccff" width="1" outline="#666666" cy:nodeTransparency="1.0" cy:nodeLabelFont="SansSerif.bold-0-12" cy:nodeLabel="ADH5" cy:borderLineType="solid"/>
  </node>
  <node label="100144479" id="-500">
    <att type="string" name="canonicalName" value="100144479"/>
    <att type="list" name="cytoscape.alias.list">
      <att type="string" name="cytoscape.alias.list" value="100144479"/>
    </att>
    <att type="string" name="geneName" value="PNMT"/>
    <att type="string" name="id" value="100144479"/>
    <graphics type="ELLIPSE" h="40.0" w="40.0" x="468.2463073730469" y="4721.13134765625" fill="#ccccff" width="1" outline="#666666" cy:nodeTransparency="1.0" cy:nodeLabelFont="SansSerif.bold-0-12" cy:nodeLabel="PNMT" cy:borderLineType="solid"/>
  </node>
  <node label="100170117" id="-499">
    <att type="string" name="canonicalName" value="100170117"/>
    <att type="list" name="cytoscape.alias.list">
      <att type="string" name="cytoscape.alias.list" value="100170117"/>
    </att>
    <att type="string" name="geneName" value="SAT2"/>
    <att type="string" name="id" value="100170117"/>
    <graphics type="ELLIPSE" h="40.0" w="40.0" x="396.07867431640625" y="4745.75390625" fill="#ccccff" width="1" outline="#666666" cy:nodeTransparency="1.0" cy:nodeLabelFont="SansSerif.bold-0-12" cy:nodeLabel="SAT2" cy:borderLineType="solid"/>
  </node>
  <node label="100627689" id="-498">
    <att type="string" name="canonicalName" value="100627689"/>
    <att type="list" name="cytoscape.alias.list">
      <att type="string" name="cytoscape.alias.list" value="100627689"/>
    </att>
    <att type="string" name="geneName" value="LOC100627689"/>
    <att type="string" name="id" value="100627689"/>
    <graphics type="ELLIPSE" h="40.0" w="40.0" x="2837.376220703125" y="4309.44677734375" fill="#ccccff" width="1" outline="#666666" cy:nodeTransparency="1.0" cy:nodeLabelFont="SansSerif.bold-0-12" cy:nodeLabel="LOC100627689" cy:borderLineType="solid"/>
  </node>
  <node label="100037299" id="-497">
    <att type="string" name="canonicalName" value="100037299"/>
    <att type="list" name="cytoscape.alias.list">
      <att type="string" name="cytoscape.alias.list" value="100037299"/>
    </att>
    <att type="string" name="geneName" value="P4HA1"/>
    <att type="string" name="id" value="100037299"/>
    <graphics type="ELLIPSE" h="40.0" w="40.0" x="2934.7578125" y="4364.8466796875" fill="#ccccff" width="1" outline="#666666" cy:nodeTransparency="1.0" cy:nodeLabelFont="SansSerif.bold-0-12" cy:nodeLabel="P4HA1" cy:borderLineType="solid"/>
  </node>
  <node label="397645" id="-496">
    <att type="string" name="canonicalName" value="397645"/>
    <att type="list" name="cytoscape.alias.list">
      <att type="string" name="cytoscape.alias.list" value="397645"/>
    </att>
    <att type="string" name="geneName" value="SAT1"/>
    <att type="string" name="id" value="397645"/>
    <graphics type="ELLIPSE" h="40.0" w="40.0" x="335.52178955078125" y="4700.59033203125" fill="#ccccff" width="1" outline="#666666" cy:nodeTransparency="1.0" cy:nodeLabelFont="SansSerif.bold-0-12" cy:nodeLabel="SAT1" cy:borderLineType="solid"/>
  </node>
  <node label="100515495" id="-495">
    <att type="string" name="canonicalName" value="100515495"/>
    <att type="list" name="cytoscape.alias.list">
      <att type="string" name="cytoscape.alias.list" value="100515495"/>
    </att>
    <att type="string" name="geneName" value="SLIT2"/>
    <att type="string" name="id" value="100515495"/>
    <graphics type="ELLIPSE" h="40.0" w="40.0" x="105.3721694946289" y="6780.95166015625" fill="#ccccff" width="1" outline="#666666" cy:nodeTransparency="1.0" cy:nodeLabelFont="SansSerif.bold-0-12" cy:nodeLabel="SLIT2" cy:borderLineType="solid"/>
  </node>
  <node label="100517310" id="-494">
    <att type="string" name="canonicalName" value="100517310"/>
    <att type="list" name="cytoscape.alias.list">
      <att type="string" name="cytoscape.alias.list" value="100517310"/>
    </att>
    <att type="string" name="geneName" value="ROBO1"/>
    <att type="string" name="id" value="100517310"/>
    <graphics type="ELLIPSE" h="40.0" w="40.0" x="102.32159423828125" y="6888.6728515625" fill="#ccccff" width="1" outline="#666666" cy:nodeTransparency="1.0" cy:nodeLabelFont="SansSerif.bold-0-12" cy:nodeLabel="ROBO1" cy:borderLineType="solid"/>
  </node>
  <node label="397447" id="-493">
    <att type="string" name="canonicalName" value="397447"/>
    <att type="list" name="cytoscape.alias.list">
      <att type="string" name="cytoscape.alias.list" value="397447"/>
    </att>
    <att type="string" name="geneName" value="ROCK1"/>
    <att type="string" name="id" value="397447"/>
    <graphics type="ELLIPSE" h="40.0" w="40.0" x="1622.5435791015625" y="3716.614990234375" fill="#ccccff" width="1" outline="#666666" cy:nodeTransparency="1.0" cy:nodeLabelFont="SansSerif.bold-0-12" cy:nodeLabel="ROCK1" cy:borderLineType="solid"/>
  </node>
  <node label="396849" id="-492">
    <att type="string" name="canonicalName" value="396849"/>
    <att type="list" name="cytoscape.alias.list">
      <att type="string" name="cytoscape.alias.list" value="396849"/>
    </att>
    <att type="string" name="geneName" value="RHOA"/>
    <att type="string" name="id" value="396849"/>
    <graphics type="ELLIPSE" h="40.0" w="40.0" x="1617.3095703125" y="3830.997802734375" fill="#ccccff" width="1" outline="#666666" cy:nodeTransparency="1.0" cy:nodeLabelFont="SansSerif.bold-0-12" cy:nodeLabel="RHOA" cy:borderLineType="solid"/>
  </node>
  <node label="100523324" id="-491">
    <att type="string" name="canonicalName" value="100523324"/>
    <att type="list" name="cytoscape.alias.list">
      <att type="string" name="cytoscape.alias.list" value="100523324"/>
    </att>
    <att type="string" name="geneName" value="ARHGEF12"/>
    <att type="string" name="id" value="100523324"/>
    <graphics type="ELLIPSE" h="40.0" w="40.0" x="1689.286376953125" y="3735.5361328125" fill="#ccccff" width="1" outline="#666666" cy:nodeTransparency="1.0" cy:nodeLabelFont="SansSerif.bold-0-12" cy:nodeLabel="ARHGEF12" cy:borderLineType="solid"/>
  </node>
  <node label="100153927" id="-490">
    <att type="string" name="canonicalName" value="100153927"/>
    <att type="list" name="cytoscape.alias.list">
      <att type="string" name="cytoscape.alias.list" value="100153927"/>
    </att>
    <att type="string" name="geneName" value="MAPK1"/>
    <att type="string" name="id" value="100153927"/>
    <graphics type="ELLIPSE" h="40.0" w="40.0" x="1731.913818359375" y="1318.731689453125" fill="#ccccff" width="1" outline="#666666" cy:nodeTransparency="1.0" cy:nodeLabelFont="SansSerif.bold-0-12" cy:nodeLabel="MAPK1" cy:borderLineType="solid"/>
  </node>
  <node label="100514811" id="-489">
    <att type="string" name="canonicalName" value="100514811"/>
    <att type="list" name="cytoscape.alias.list">
      <att type="string" name="cytoscape.alias.list" value="100514811"/>
    </att>
    <att type="string" name="geneName" value="PLA2G4E"/>
    <att type="string" name="id" value="100514811"/>
    <graphics type="ELLIPSE" h="40.0" w="40.0" x="2157.42822265625" y="1862.7607421875" fill="#ccccff" width="1" outline="#666666" cy:nodeTransparency="1.0" cy:nodeLabelFont="SansSerif.bold-0-12" cy:nodeLabel="PLA2G4E" cy:borderLineType="solid"/>
  </node>
  <node label="100624812" id="-488">
    <att type="string" name="canonicalName" value="100624812"/>
    <att type="list" name="cytoscape.alias.list">
      <att type="string" name="cytoscape.alias.list" value="100624812"/>
    </att>
    <att type="string" name="geneName" value="LOC100624812"/>
    <att type="string" name="id" value="100624812"/>
    <graphics type="ELLIPSE" h="40.0" w="40.0" x="446.7380065917969" y="6453.0" fill="#ccccff" width="1" outline="#666666" cy:nodeTransparency="1.0" cy:nodeLabelFont="SansSerif.bold-0-12" cy:nodeLabel="LOC100624812" cy:borderLineType="solid"/>
  </node>
  <node label="100233192" id="-487">
    <att type="string" name="canonicalName" value="100233192"/>
    <att type="list" name="cytoscape.alias.list">
      <att type="string" name="cytoscape.alias.list" value="100233192"/>
    </att>
    <att type="string" name="geneName" value="MAPKAPK3"/>
    <att type="string" name="id" value="100233192"/>
    <graphics type="ELLIPSE" h="40.0" w="40.0" x="516.5464477539062" y="6368.77587890625" fill="#ccccff" width="1" outline="#666666" cy:nodeTransparency="1.0" cy:nodeLabelFont="SansSerif.bold-0-12" cy:nodeLabel="MAPKAPK3" cy:borderLineType="solid"/>
  </node>
  <node label="493184" id="-486">
    <att type="string" name="canonicalName" value="493184"/>
    <att type="list" name="cytoscape.alias.list">
      <att type="string" name="cytoscape.alias.list" value="493184"/>
    </att>
    <att type="string" name="geneName" value="HSP27"/>
    <att type="string" name="id" value="493184"/>
    <graphics type="ELLIPSE" h="40.0" w="40.0" x="579.5540161132812" y="6279.349609375" fill="#ccccff" width="1" outline="#666666" cy:nodeTransparency="1.0" cy:nodeLabelFont="SansSerif.bold-0-12" cy:nodeLabel="HSP27" cy:borderLineType="solid"/>
  </node>
  <node label="397311" id="-485">
    <att type="string" name="canonicalName" value="397311"/>
    <att type="list" name="cytoscape.alias.list">
      <att type="string" name="cytoscape.alias.list" value="397311"/>
    </att>
    <att type="string" name="geneName" value="KDR"/>
    <att type="string" name="id" value="397311"/>
    <graphics type="ELLIPSE" h="40.0" w="40.0" x="2184.246337890625" y="2727.8515625" fill="#ccccff" width="1" outline="#666666" cy:nodeTransparency="1.0" cy:nodeLabelFont="SansSerif.bold-0-12" cy:nodeLabel="KDR" cy:borderLineType="solid"/>
  </node>
  <node label="100518131" id="-484">
    <att type="string" name="canonicalName" value="100518131"/>
    <att type="list" name="cytoscape.alias.list">
      <att type="string" name="cytoscape.alias.list" value="100518131"/>
    </att>
    <att type="string" name="geneName" value="PIK3CD"/>
    <att type="string" name="id" value="100518131"/>
    <graphics type="ELLIPSE" h="40.0" w="40.0" x="2082.140380859375" y="2766.72314453125" fill="#ccccff" width="1" outline="#666666" cy:nodeTransparency="1.0" cy:nodeLabelFont="SansSerif.bold-0-12" cy:nodeLabel="PIK3CD" cy:borderLineType="solid"/>
  </node>
  <node label="100520687" id="-483">
    <att type="string" name="canonicalName" value="100520687"/>
    <att type="list" name="cytoscape.alias.list">
      <att type="string" name="cytoscape.alias.list" value="100520687"/>
    </att>
    <att type="string" name="geneName" value="LOC100520687"/>
    <att type="string" name="id" value="100520687"/>
    <graphics type="ELLIPSE" h="40.0" w="40.0" x="2436.40869140625" y="2500.809814453125" fill="#ccccff" width="1" outline="#666666" cy:nodeTransparency="1.0" cy:nodeLabelFont="SansSerif.bold-0-12" cy:nodeLabel="LOC100520687" cy:borderLineType="solid"/>
  </node>
  <node label="100512568" id="-482">
    <att type="string" name="canonicalName" value="100512568"/>
    <att type="list" name="cytoscape.alias.list">
      <att type="string" name="cytoscape.alias.list" value="100512568"/>
    </att>
    <att type="string" name="geneName" value="LOC100512568"/>
    <att type="string" name="id" value="100512568"/>
    <graphics type="ELLIPSE" h="40.0" w="40.0" x="2.3215904235839844" y="6780.95166015625" fill="#ccccff" width="1" outline="#666666" cy:nodeTransparency="1.0" cy:nodeLabelFont="SansSerif.bold-0-12" cy:nodeLabel="LOC100512568" cy:borderLineType="solid"/>
  </node>
  <node label="100623705" id="-481">
    <att type="string" name="canonicalName" value="100623705"/>
    <att type="list" name="cytoscape.alias.list">
      <att type="string" name="cytoscape.alias.list" value="100623705"/>
    </att>
    <att type="string" name="geneName" value="LOC100623705"/>
    <att type="string" name="id" value="100623705"/>
    <graphics type="ELLIPSE" h="40.0" w="40.0" x="0.0" y="6888.69091796875" fill="#ccccff" width="1" outline="#666666" cy:nodeTransparency="1.0" cy:nodeLabelFont="SansSerif.bold-0-12" cy:nodeLabel="LOC100623705" cy:borderLineType="solid"/>
  </node>
  <node label="100155098" id="-480">
    <att type="string" name="canonicalName" value="100155098"/>
    <att type="list" name="cytoscape.alias.list">
      <att type="string" name="cytoscape.alias.list" value="100155098"/>
    </att>
    <att type="string" name="geneName" value="LOC100155098"/>
    <att type="string" name="id" value="100155098"/>
    <graphics type="ELLIPSE" h="40.0" w="40.0" x="2179.561767578125" y="5813.50146484375" fill="#ccccff" width="1" outline="#666666" cy:nodeTransparency="1.0" cy:nodeLabelFont="SansSerif.bold-0-12" cy:nodeLabel="LOC100155098" cy:borderLineType="solid"/>
  </node>
  <node label="100156132" id="-479">
    <att type="string" name="canonicalName" value="100156132"/>
    <att type="list" name="cytoscape.alias.list">
      <att type="string" name="cytoscape.alias.list" value="100156132"/>
    </att>
    <att type="string" name="geneName" value="NOP58"/>
    <att type="string" name="id" value="100156132"/>
    <graphics type="ELLIPSE" h="40.0" w="40.0" x="2245.4443359375" y="5725.59326171875" fill="#ccccff" width="1" outline="#666666" cy:nodeTransparency="1.0" cy:nodeLabelFont="SansSerif.bold-0-12" cy:nodeLabel="NOP58" cy:borderLineType="solid"/>
  </node>
  <node label="100511276" id="-478">
    <att type="string" name="canonicalName" value="100511276"/>
    <att type="list" name="cytoscape.alias.list">
      <att type="string" name="cytoscape.alias.list" value="100511276"/>
    </att>
    <att type="string" name="geneName" value="NOL6"/>
    <att type="string" name="id" value="100511276"/>
    <graphics type="ELLIPSE" h="40.0" w="40.0" x="2768.4267578125" y="6573.18896484375" fill="#ccccff" width="1" outline="#666666" cy:nodeTransparency="1.0" cy:nodeLabelFont="SansSerif.bold-0-12" cy:nodeLabel="NOL6" cy:borderLineType="solid"/>
  </node>
  <node label="100737256" id="-477">
    <att type="string" name="canonicalName" value="100737256"/>
    <att type="list" name="cytoscape.alias.list">
      <att type="string" name="cytoscape.alias.list" value="100737256"/>
    </att>
    <att type="string" name="geneName" value="LOC100737256"/>
    <att type="string" name="id" value="100737256"/>
    <graphics type="ELLIPSE" h="40.0" w="40.0" x="2765.4091796875" y="6680.9111328125" fill="#ccccff" width="1" outline="#666666" cy:nodeTransparency="1.0" cy:nodeLabelFont="SansSerif.bold-0-12" cy:nodeLabel="LOC100737256" cy:borderLineType="solid"/>
  </node>
  <node label="100512446" id="-476">
    <att type="string" name="canonicalName" value="100512446"/>
    <att type="list" name="cytoscape.alias.list">
      <att type="string" name="cytoscape.alias.list" value="100512446"/>
    </att>
    <att type="string" name="geneName" value="NOP56"/>
    <att type="string" name="id" value="100512446"/>
    <graphics type="ELLIPSE" h="40.0" w="40.0" x="2407.896728515625" y="5579.4306640625" fill="#ccccff" width="1" outline="#666666" cy:nodeTransparency="1.0" cy:nodeLabelFont="SansSerif.bold-0-12" cy:nodeLabel="NOP56" cy:borderLineType="solid"/>
  </node>
  <node label="100155420" id="-475">
    <att type="string" name="canonicalName" value="100155420"/>
    <att type="list" name="cytoscape.alias.list">
      <att type="string" name="cytoscape.alias.list" value="100155420"/>
    </att>
    <att type="string" name="geneName" value="NHP2L1"/>
    <att type="string" name="id" value="100155420"/>
    <graphics type="ELLIPSE" h="40.0" w="40.0" x="2321.64794921875" y="5647.49658203125" fill="#ccccff" width="1" outline="#666666" cy:nodeTransparency="1.0" cy:nodeLabelFont="SansSerif.bold-0-12" cy:nodeLabel="NHP2L1" cy:borderLineType="solid"/>
  </node>
  <node label="100627271" id="-474">
    <att type="string" name="canonicalName" value="100627271"/>
    <att type="list" name="cytoscape.alias.list">
      <att type="string" name="cytoscape.alias.list" value="100627271"/>
    </att>
    <att type="string" name="geneName" value="LOC100627271"/>
    <att type="string" name="id" value="100627271"/>
    <graphics type="ELLIPSE" h="40.0" w="40.0" x="2665.4091796875" y="6573.18896484375" fill="#ccccff" width="1" outline="#666666" cy:nodeTransparency="1.0" cy:nodeLabelFont="SansSerif.bold-0-12" cy:nodeLabel="LOC100627271" cy:borderLineType="solid"/>
  </node>
  <node label="100154556" id="-473">
    <att type="string" name="canonicalName" value="100154556"/>
    <att type="list" name="cytoscape.alias.list">
      <att type="string" name="cytoscape.alias.list" value="100154556"/>
    </att>
    <att type="string" name="geneName" value="WDR3"/>
    <att type="string" name="id" value="100154556"/>
    <graphics type="ELLIPSE" h="40.0" w="40.0" x="2663.087646484375" y="6680.92822265625" fill="#ccccff" width="1" outline="#666666" cy:nodeTransparency="1.0" cy:nodeLabelFont="SansSerif.bold-0-12" cy:nodeLabel="WDR3" cy:borderLineType="solid"/>
  </node>
  <node label="100151875" id="-472">
    <att type="string" name="canonicalName" value="100151875"/>
    <att type="list" name="cytoscape.alias.list">
      <att type="string" name="cytoscape.alias.list" value="100151875"/>
    </att>
    <att type="string" name="geneName" value="LOC100151875"/>
    <att type="string" name="id" value="100151875"/>
    <graphics type="ELLIPSE" h="40.0" w="40.0" x="2563.087646484375" y="6573.18896484375" fill="#ccccff" width="1" outline="#666666" cy:nodeTransparency="1.0" cy:nodeLabelFont="SansSerif.bold-0-12" cy:nodeLabel="LOC100151875" cy:borderLineType="solid"/>
  </node>
  <node label="100156173" id="-471">
    <att type="string" name="canonicalName" value="100156173"/>
    <att type="list" name="cytoscape.alias.list">
      <att type="string" name="cytoscape.alias.list" value="100156173"/>
    </att>
    <att type="string" name="geneName" value="RBM8A"/>
    <att type="string" name="id" value="100156173"/>
    <graphics type="ELLIPSE" h="40.0" w="40.0" x="2559.831298828125" y="6680.90380859375" fill="#ccccff" width="1" outline="#666666" cy:nodeTransparency="1.0" cy:nodeLabelFont="SansSerif.bold-0-12" cy:nodeLabel="RBM8A" cy:borderLineType="solid"/>
  </node>
  <node label="100156323" id="-470">
    <att type="string" name="canonicalName" value="100156323"/>
    <att type="list" name="cytoscape.alias.list">
      <att type="string" name="cytoscape.alias.list" value="100156323"/>
    </att>
    <att type="string" name="geneName" value="LOC100156323"/>
    <att type="string" name="id" value="100156323"/>
    <graphics type="ELLIPSE" h="40.0" w="40.0" x="2459.831298828125" y="6573.18896484375" fill="#ccccff" width="1" outline="#666666" cy:nodeTransparency="1.0" cy:nodeLabelFont="SansSerif.bold-0-12" cy:nodeLabel="LOC100156323" cy:borderLineType="solid"/>
  </node>
  <node label="100523128" id="-469">
    <att type="string" name="canonicalName" value="100523128"/>
    <att type="list" name="cytoscape.alias.list">
      <att type="string" name="cytoscape.alias.list" value="100523128"/>
    </att>
    <att type="string" name="geneName" value="LOC100523128"/>
    <att type="string" name="id" value="100523128"/>
    <graphics type="ELLIPSE" h="40.0" w="40.0" x="2457.022705078125" y="6680.91650390625" fill="#ccccff" width="1" outline="#666666" cy:nodeTransparency="1.0" cy:nodeLabelFont="SansSerif.bold-0-12" cy:nodeLabel="LOC100523128" cy:borderLineType="solid"/>
  </node>
  <node label="100156513" id="-468">
    <att type="string" name="canonicalName" value="100156513"/>
    <att type="list" name="cytoscape.alias.list">
      <att type="string" name="cytoscape.alias.list" value="100156513"/>
    </att>
    <att type="string" name="geneName" value="NCBP2"/>
    <att type="string" name="id" value="100156513"/>
    <graphics type="ELLIPSE" h="40.0" w="40.0" x="2357.022705078125" y="6573.18896484375" fill="#ccccff" width="1" outline="#666666" cy:nodeTransparency="1.0" cy:nodeLabelFont="SansSerif.bold-0-12" cy:nodeLabel="NCBP2" cy:borderLineType="solid"/>
  </node>
  <node label="100625772" id="-467">
    <att type="string" name="canonicalName" value="100625772"/>
    <att type="list" name="cytoscape.alias.list">
      <att type="string" name="cytoscape.alias.list" value="100625772"/>
    </att>
    <att type="string" name="geneName" value="LOC100625772"/>
    <att type="string" name="id" value="100625772"/>
    <graphics type="ELLIPSE" h="40.0" w="40.0" x="2354.01220703125" y="6680.9111328125" fill="#ccccff" width="1" outline="#666666" cy:nodeTransparency="1.0" cy:nodeLabelFont="SansSerif.bold-0-12" cy:nodeLabel="LOC100625772" cy:borderLineType="solid"/>
  </node>
  <node label="100153097" id="-466">
    <att type="string" name="canonicalName" value="100153097"/>
    <att type="list" name="cytoscape.alias.list">
      <att type="string" name="cytoscape.alias.list" value="100153097"/>
    </att>
    <att type="string" name="geneName" value="SMG5"/>
    <att type="string" name="id" value="100153097"/>
    <graphics type="ELLIPSE" h="40.0" w="40.0" x="1969.7347412109375" y="5666.89013671875" fill="#ccccff" width="1" outline="#666666" cy:nodeTransparency="1.0" cy:nodeLabelFont="SansSerif.bold-0-12" cy:nodeLabel="SMG5" cy:borderLineType="solid"/>
  </node>
  <node label="397089" id="-465">
    <att type="string" name="canonicalName" value="397089"/>
    <att type="list" name="cytoscape.alias.list">
      <att type="string" name="cytoscape.alias.list" value="397089"/>
    </att>
    <att type="string" name="geneName" value="PPP2R2B"/>
    <att type="string" name="id" value="397089"/>
    <graphics type="ELLIPSE" h="40.0" w="40.0" x="1901.262451171875" y="5579.4306640625" fill="#ccccff" width="1" outline="#666666" cy:nodeTransparency="1.0" cy:nodeLabelFont="SansSerif.bold-0-12" cy:nodeLabel="PPP2R2B" cy:borderLineType="solid"/>
  </node>
  <node label="100525377" id="-464">
    <att type="string" name="canonicalName" value="100525377"/>
    <att type="list" name="cytoscape.alias.list">
      <att type="string" name="cytoscape.alias.list" value="100525377"/>
    </att>
    <att type="string" name="geneName" value="PPP2R5E"/>
    <att type="string" name="id" value="100525377"/>
    <graphics type="ELLIPSE" h="40.0" w="40.0" x="2079.561767578125" y="5674.435546875" fill="#ccccff" width="1" outline="#666666" cy:nodeTransparency="1.0" cy:nodeLabelFont="SansSerif.bold-0-12" cy:nodeLabel="PPP2R5E" cy:borderLineType="solid"/>
  </node>
  <node label="397090" id="-463">
    <att type="string" name="canonicalName" value="397090"/>
    <att type="list" name="cytoscape.alias.list">
      <att type="string" name="cytoscape.alias.list" value="397090"/>
    </att>
    <att type="string" name="geneName" value="PPP2R2A"/>
    <att type="string" name="id" value="397090"/>
    <graphics type="ELLIPSE" h="40.0" w="40.0" x="1950.59716796875" y="5775.27392578125" fill="#ccccff" width="1" outline="#666666" cy:nodeTransparency="1.0" cy:nodeLabelFont="SansSerif.bold-0-12" cy:nodeLabel="PPP2R2A" cy:borderLineType="solid"/>
  </node>
  <node label="448813" id="-462">
    <att type="string" name="canonicalName" value="448813"/>
    <att type="list" name="cytoscape.alias.list">
      <att type="string" name="cytoscape.alias.list" value="448813"/>
    </att>
    <att type="string" name="geneName" value="DDX39B"/>
    <att type="string" name="id" value="448813"/>
    <graphics type="ELLIPSE" h="40.0" w="40.0" x="2253.016845703125" y="6573.18896484375" fill="#ccccff" width="1" outline="#666666" cy:nodeTransparency="1.0" cy:nodeLabelFont="SansSerif.bold-0-12" cy:nodeLabel="DDX39B" cy:borderLineType="solid"/>
  </node>
  <node label="100521629" id="-461">
    <att type="string" name="canonicalName" value="100521629"/>
    <att type="list" name="cytoscape.alias.list">
      <att type="string" name="cytoscape.alias.list" value="100521629"/>
    </att>
    <att type="string" name="geneName" value="SRRM1"/>
    <att type="string" name="id" value="100521629"/>
    <graphics type="ELLIPSE" h="40.0" w="40.0" x="2254.01220703125" y="6680.9482421875" fill="#ccccff" width="1" outline="#666666" cy:nodeTransparency="1.0" cy:nodeLabelFont="SansSerif.bold-0-12" cy:nodeLabel="SRRM1" cy:borderLineType="solid"/>
  </node>
  <node label="397655" id="-460">
    <att type="string" name="canonicalName" value="397655"/>
    <att type="list" name="cytoscape.alias.list">
      <att type="string" name="cytoscape.alias.list" value="397655"/>
    </att>
    <att type="string" name="geneName" value="RAN"/>
    <att type="string" name="id" value="397655"/>
    <graphics type="ELLIPSE" h="40.0" w="40.0" x="2153.016845703125" y="6573.18896484375" fill="#ccccff" width="1" outline="#666666" cy:nodeTransparency="1.0" cy:nodeLabelFont="SansSerif.bold-0-12" cy:nodeLabel="RAN" cy:borderLineType="solid"/>
  </node>
  <node label="100515013" id="-459">
    <att type="string" name="canonicalName" value="100515013"/>
    <att type="list" name="cytoscape.alias.list">
      <att type="string" name="cytoscape.alias.list" value="100515013"/>
    </att>
    <att type="string" name="geneName" value="LOC100515013"/>
    <att type="string" name="id" value="100515013"/>
    <graphics type="ELLIPSE" h="40.0" w="40.0" x="2150.69384765625" y="6680.92822265625" fill="#ccccff" width="1" outline="#666666" cy:nodeTransparency="1.0" cy:nodeLabelFont="SansSerif.bold-0-12" cy:nodeLabel="LOC100515013" cy:borderLineType="solid"/>
  </node>
  <node label="100621146" id="-458">
    <att type="string" name="canonicalName" value="100621146"/>
    <att type="list" name="cytoscape.alias.list">
      <att type="string" name="cytoscape.alias.list" value="100621146"/>
    </att>
    <att type="string" name="geneName" value="LOC100621146"/>
    <att type="string" name="id" value="100621146"/>
    <graphics type="ELLIPSE" h="40.0" w="40.0" x="2050.69384765625" y="6573.18896484375" fill="#ccccff" width="1" outline="#666666" cy:nodeTransparency="1.0" cy:nodeLabelFont="SansSerif.bold-0-12" cy:nodeLabel="LOC100621146" cy:borderLineType="solid"/>
  </node>
  <node label="397330" id="-457">
    <att type="string" name="canonicalName" value="397330"/>
    <att type="list" name="cytoscape.alias.list">
      <att type="string" name="cytoscape.alias.list" value="397330"/>
    </att>
    <att type="string" name="geneName" value="XPO1"/>
    <att type="string" name="id" value="397330"/>
    <graphics type="ELLIPSE" h="40.0" w="40.0" x="2047.897216796875" y="6680.9169921875" fill="#ccccff" width="1" outline="#666666" cy:nodeTransparency="1.0" cy:nodeLabelFont="SansSerif.bold-0-12" cy:nodeLabel="XPO1" cy:borderLineType="solid"/>
  </node>
  <node label="100156570" id="-456">
    <att type="string" name="canonicalName" value="100156570"/>
    <att type="list" name="cytoscape.alias.list">
      <att type="string" name="cytoscape.alias.list" value="100156570"/>
    </att>
    <att type="string" name="geneName" value="LOC100156570"/>
    <att type="string" name="id" value="100156570"/>
    <graphics type="ELLIPSE" h="40.0" w="40.0" x="1947.897216796875" y="6573.18896484375" fill="#ccccff" width="1" outline="#666666" cy:nodeTransparency="1.0" cy:nodeLabelFont="SansSerif.bold-0-12" cy:nodeLabel="LOC100156570" cy:borderLineType="solid"/>
  </node>
  <node label="100736981" id="-455">
    <att type="string" name="canonicalName" value="100736981"/>
    <att type="list" name="cytoscape.alias.list">
      <att type="string" name="cytoscape.alias.list" value="100736981"/>
    </att>
    <att type="string" name="geneName" value="LOC100736981"/>
    <att type="string" name="id" value="100736981"/>
    <graphics type="ELLIPSE" h="40.0" w="40.0" x="1945.1005859375" y="6680.9169921875" fill="#ccccff" width="1" outline="#666666" cy:nodeTransparency="1.0" cy:nodeLabelFont="SansSerif.bold-0-12" cy:nodeLabel="LOC100736981" cy:borderLineType="solid"/>
  </node>
  <node label="100101926" id="-454">
    <att type="string" name="canonicalName" value="100101926"/>
    <att type="list" name="cytoscape.alias.list">
      <att type="string" name="cytoscape.alias.list" value="100101926"/>
    </att>
    <att type="string" name="geneName" value="EIF4A3"/>
    <att type="string" name="id" value="100101926"/>
    <graphics type="ELLIPSE" h="40.0" w="40.0" x="196.15573120117188" y="6437.388671875" fill="#ccccff" width="1" outline="#666666" cy:nodeTransparency="1.0" cy:nodeLabelFont="SansSerif.bold-0-12" cy:nodeLabel="EIF4A3" cy:borderLineType="solid"/>
  </node>
  <node label="100628213" id="-453">
    <att type="string" name="canonicalName" value="100628213"/>
    <att type="list" name="cytoscape.alias.list">
      <att type="string" name="cytoscape.alias.list" value="100628213"/>
    </att>
    <att type="string" name="geneName" value="NXF1"/>
    <att type="string" name="id" value="100628213"/>
    <graphics type="ELLIPSE" h="40.0" w="40.0" x="266.13262939453125" y="6353.328125" fill="#ccccff" width="1" outline="#666666" cy:nodeTransparency="1.0" cy:nodeLabelFont="SansSerif.bold-0-12" cy:nodeLabel="NXF1" cy:borderLineType="solid"/>
  </node>
  <node label="100125839" id="-452">
    <att type="string" name="canonicalName" value="100125839"/>
    <att type="list" name="cytoscape.alias.list">
      <att type="string" name="cytoscape.alias.list" value="100125839"/>
    </att>
    <att type="string" name="geneName" value="RAE1"/>
    <att type="string" name="id" value="100125839"/>
    <graphics type="ELLIPSE" h="40.0" w="40.0" x="346.7380065917969" y="6279.349609375" fill="#ccccff" width="1" outline="#666666" cy:nodeTransparency="1.0" cy:nodeLabelFont="SansSerif.bold-0-12" cy:nodeLabel="RAE1" cy:borderLineType="solid"/>
  </node>
  <node label="100520826" id="-451">
    <att type="string" name="canonicalName" value="100520826"/>
    <att type="list" name="cytoscape.alias.list">
      <att type="string" name="cytoscape.alias.list" value="100520826"/>
    </att>
    <att type="string" name="geneName" value="LOC100520826"/>
    <att type="string" name="id" value="100520826"/>
    <graphics type="ELLIPSE" h="40.0" w="40.0" x="1845.1005859375" y="6573.18896484375" fill="#ccccff" width="1" outline="#666666" cy:nodeTransparency="1.0" cy:nodeLabelFont="SansSerif.bold-0-12" cy:nodeLabel="LOC100520826" cy:borderLineType="solid"/>
  </node>
  <node label="100101929" id="-450">
    <att type="string" name="canonicalName" value="100101929"/>
    <att type="list" name="cytoscape.alias.list">
      <att type="string" name="cytoscape.alias.list" value="100101929"/>
    </att>
    <att type="string" name="geneName" value="EIF4A1"/>
    <att type="string" name="id" value="100101929"/>
    <graphics type="ELLIPSE" h="40.0" w="40.0" x="1841.88037109375" y="6680.9052734375" fill="#ccccff" width="1" outline="#666666" cy:nodeTransparency="1.0" cy:nodeLabelFont="SansSerif.bold-0-12" cy:nodeLabel="EIF4A1" cy:borderLineType="solid"/>
  </node>
  <node label="100521499" id="-449">
    <att type="string" name="canonicalName" value="100521499"/>
    <att type="list" name="cytoscape.alias.list">
      <att type="string" name="cytoscape.alias.list" value="100521499"/>
    </att>
    <att type="string" name="geneName" value="EIF3I"/>
    <att type="string" name="id" value="100521499"/>
    <graphics type="ELLIPSE" h="40.0" w="40.0" x="0.0" y="6473.18896484375" fill="#ccccff" width="1" outline="#666666" cy:nodeTransparency="1.0" cy:nodeLabelFont="SansSerif.bold-0-12" cy:nodeLabel="EIF3I" cy:borderLineType="solid"/>
  </node>
  <node label="100155472" id="-448">
    <att type="string" name="canonicalName" value="100155472"/>
    <att type="list" name="cytoscape.alias.list">
      <att type="string" name="cytoscape.alias.list" value="100155472"/>
    </att>
    <att type="string" name="geneName" value="LOC100155472"/>
    <att type="string" name="id" value="100155472"/>
    <graphics type="ELLIPSE" h="40.0" w="40.0" x="49.103363037109375" y="6377.2392578125" fill="#ccccff" width="1" outline="#666666" cy:nodeTransparency="1.0" cy:nodeLabelFont="SansSerif.bold-0-12" cy:nodeLabel="LOC100155472" cy:borderLineType="solid"/>
  </node>
  <node label="100518833" id="-447">
    <att type="string" name="canonicalName" value="100518833"/>
    <att type="list" name="cytoscape.alias.list">
      <att type="string" name="cytoscape.alias.list" value="100518833"/>
    </att>
    <att type="string" name="geneName" value="LOC100518833"/>
    <att type="string" name="id" value="100518833"/>
    <graphics type="ELLIPSE" h="40.0" w="40.0" x="1741.88037109375" y="6573.18896484375" fill="#ccccff" width="1" outline="#666666" cy:nodeTransparency="1.0" cy:nodeLabelFont="SansSerif.bold-0-12" cy:nodeLabel="LOC100518833" cy:borderLineType="solid"/>
  </node>
  <node label="100152786" id="-446">
    <att type="string" name="canonicalName" value="100152786"/>
    <att type="list" name="cytoscape.alias.list">
      <att type="string" name="cytoscape.alias.list" value="100152786"/>
    </att>
    <att type="string" name="geneName" value="DDX20"/>
    <att type="string" name="id" value="100152786"/>
    <graphics type="ELLIPSE" h="40.0" w="40.0" x="1739.1229248046875" y="6680.91796875" fill="#ccccff" width="1" outline="#666666" cy:nodeTransparency="1.0" cy:nodeLabelFont="SansSerif.bold-0-12" cy:nodeLabel="DDX20" cy:borderLineType="solid"/>
  </node>
  <node label="100525087" id="-445">
    <att type="string" name="canonicalName" value="100525087"/>
    <att type="list" name="cytoscape.alias.list">
      <att type="string" name="cytoscape.alias.list" value="100525087"/>
    </att>
    <att type="string" name="geneName" value="LOC100525087"/>
    <att type="string" name="id" value="100525087"/>
    <graphics type="ELLIPSE" h="40.0" w="40.0" x="353.1741027832031" y="5579.4306640625" fill="#ccccff" width="1" outline="#666666" cy:nodeTransparency="1.0" cy:nodeLabelFont="SansSerif.bold-0-12" cy:nodeLabel="LOC100525087" cy:borderLineType="solid"/>
  </node>
  <node label="100512848" id="-444">
    <att type="string" name="canonicalName" value="100512848"/>
    <att type="list" name="cytoscape.alias.list">
      <att type="string" name="cytoscape.alias.list" value="100512848"/>
    </att>
    <att type="string" name="geneName" value="CNOT6L"/>
    <att type="string" name="id" value="100512848"/>
    <graphics type="ELLIPSE" h="40.0" w="40.0" x="345.83856201171875" y="5689.7275390625" fill="#ccccff" width="1" outline="#666666" cy:nodeTransparency="1.0" cy:nodeLabelFont="SansSerif.bold-0-12" cy:nodeLabel="CNOT6L" cy:borderLineType="solid"/>
  </node>
  <node label="100153204" id="-443">
    <att type="string" name="canonicalName" value="100153204"/>
    <att type="list" name="cytoscape.alias.list">
      <att type="string" name="cytoscape.alias.list" value="100153204"/>
    </att>
    <att type="string" name="geneName" value="WDR61"/>
    <att type="string" name="id" value="100153204"/>
    <graphics type="ELLIPSE" h="40.0" w="40.0" x="1639.1229248046875" y="6573.18896484375" fill="#ccccff" width="1" outline="#666666" cy:nodeTransparency="1.0" cy:nodeLabelFont="SansSerif.bold-0-12" cy:nodeLabel="WDR61" cy:borderLineType="solid"/>
  </node>
  <node label="100124376" id="-442">
    <att type="string" name="canonicalName" value="100124376"/>
    <att type="list" name="cytoscape.alias.list">
      <att type="string" name="cytoscape.alias.list" value="100124376"/>
    </att>
    <att type="string" name="geneName" value="SKIV2L"/>
    <att type="string" name="id" value="100124376"/>
    <graphics type="ELLIPSE" h="40.0" w="40.0" x="1635.902587890625" y="6680.9052734375" fill="#ccccff" width="1" outline="#666666" cy:nodeTransparency="1.0" cy:nodeLabelFont="SansSerif.bold-0-12" cy:nodeLabel="SKIV2L" cy:borderLineType="solid"/>
  </node>
  <node label="100154442" id="-441">
    <att type="string" name="canonicalName" value="100154442"/>
    <att type="list" name="cytoscape.alias.list">
      <att type="string" name="cytoscape.alias.list" value="100154442"/>
    </att>
    <att type="string" name="geneName" value="CNOT7"/>
    <att type="string" name="id" value="100154442"/>
    <graphics type="ELLIPSE" h="40.0" w="40.0" x="342.57769775390625" y="5803.115234375" fill="#ccccff" width="1" outline="#666666" cy:nodeTransparency="1.0" cy:nodeLabelFont="SansSerif.bold-0-12" cy:nodeLabel="CNOT7" cy:borderLineType="solid"/>
  </node>
  <node label="100516183" id="-440">
    <att type="string" name="canonicalName" value="100516183"/>
    <att type="list" name="cytoscape.alias.list">
      <att type="string" name="cytoscape.alias.list" value="100516183"/>
    </att>
    <att type="string" name="geneName" value="CNOT6"/>
    <att type="string" name="id" value="100516183"/>
    <graphics type="ELLIPSE" h="40.0" w="40.0" x="254.98947143554688" y="5873.3994140625" fill="#ccccff" width="1" outline="#666666" cy:nodeTransparency="1.0" cy:nodeLabelFont="SansSerif.bold-0-12" cy:nodeLabel="CNOT6" cy:borderLineType="solid"/>
  </node>
  <node label="100144440" id="-439">
    <att type="string" name="canonicalName" value="100144440"/>
    <att type="list" name="cytoscape.alias.list">
      <att type="string" name="cytoscape.alias.list" value="100144440"/>
    </att>
    <att type="string" name="geneName" value="TOB1"/>
    <att type="string" name="id" value="100144440"/>
    <graphics type="ELLIPSE" h="40.0" w="40.0" x="430.09564208984375" y="5873.26806640625" fill="#ccccff" width="1" outline="#666666" cy:nodeTransparency="1.0" cy:nodeLabelFont="SansSerif.bold-0-12" cy:nodeLabel="TOB1" cy:borderLineType="solid"/>
  </node>
  <node label="100521132" id="-438">
    <att type="string" name="canonicalName" value="100521132"/>
    <att type="list" name="cytoscape.alias.list">
      <att type="string" name="cytoscape.alias.list" value="100521132"/>
    </att>
    <att type="string" name="geneName" value="EDC4"/>
    <att type="string" name="id" value="100521132"/>
    <graphics type="ELLIPSE" h="40.0" w="40.0" x="1535.902587890625" y="6573.18896484375" fill="#ccccff" width="1" outline="#666666" cy:nodeTransparency="1.0" cy:nodeLabelFont="SansSerif.bold-0-12" cy:nodeLabel="EDC4" cy:borderLineType="solid"/>
  </node>
  <node label="100623102" id="-437">
    <att type="string" name="canonicalName" value="100623102"/>
    <att type="list" name="cytoscape.alias.list">
      <att type="string" name="cytoscape.alias.list" value="100623102"/>
    </att>
    <att type="string" name="geneName" value="DCP1A"/>
    <att type="string" name="id" value="100623102"/>
    <graphics type="ELLIPSE" h="40.0" w="40.0" x="1532.6995849609375" y="6680.90576171875" fill="#ccccff" width="1" outline="#666666" cy:nodeTransparency="1.0" cy:nodeLabelFont="SansSerif.bold-0-12" cy:nodeLabel="DCP1A" cy:borderLineType="solid"/>
  </node>
  <node label="595123" id="-436">
    <att type="string" name="canonicalName" value="595123"/>
    <att type="list" name="cytoscape.alias.list">
      <att type="string" name="cytoscape.alias.list" value="595123"/>
    </att>
    <att type="string" name="geneName" value="NAMPT"/>
    <att type="string" name="id" value="595123"/>
    <graphics type="ELLIPSE" h="40.0" w="40.0" x="1364.473388671875" y="1651.039306640625" fill="#ccccff" width="1" outline="#666666" cy:nodeTransparency="1.0" cy:nodeLabelFont="SansSerif.bold-0-12" cy:nodeLabel="NAMPT" cy:borderLineType="solid"/>
  </node>
  <node label="100625942" id="-435">
    <att type="string" name="canonicalName" value="100625942"/>
    <att type="list" name="cytoscape.alias.list">
      <att type="string" name="cytoscape.alias.list" value="100625942"/>
    </att>
    <att type="string" name="geneName" value="LOC100625942"/>
    <att type="string" name="id" value="100625942"/>
    <graphics type="ELLIPSE" h="40.0" w="40.0" x="1449.158935546875" y="1711.5362548828125" fill="#ccccff" width="1" outline="#666666" cy:nodeTransparency="1.0" cy:nodeLabelFont="SansSerif.bold-0-12" cy:nodeLabel="LOC100625942" cy:borderLineType="solid"/>
  </node>
  <node label="100037271" id="-434">
    <att type="string" name="canonicalName" value="100037271"/>
    <att type="list" name="cytoscape.alias.list">
      <att type="string" name="cytoscape.alias.list" value="100037271"/>
    </att>
    <att type="string" name="geneName" value="ENPP1"/>
    <att type="string" name="id" value="100037271"/>
    <graphics type="ELLIPSE" h="40.0" w="40.0" x="1247.1632080078125" y="1720.96044921875" fill="#ccccff" width="1" outline="#666666" cy:nodeTransparency="1.0" cy:nodeLabelFont="SansSerif.bold-0-12" cy:nodeLabel="ENPP1" cy:borderLineType="solid"/>
  </node>
  <node label="100518171" id="-433">
    <att type="string" name="canonicalName" value="100518171"/>
    <att type="list" name="cytoscape.alias.list">
      <att type="string" name="cytoscape.alias.list" value="100518171"/>
    </att>
    <att type="string" name="geneName" value="LOC100518171"/>
    <att type="string" name="id" value="100518171"/>
    <graphics type="ELLIPSE" h="40.0" w="40.0" x="1409.0401611328125" y="1749.2071533203125" fill="#ccccff" width="1" outline="#666666" cy:nodeTransparency="1.0" cy:nodeLabelFont="SansSerif.bold-0-12" cy:nodeLabel="LOC100518171" cy:borderLineType="solid"/>
  </node>
  <node label="100515332" id="-432">
    <att type="string" name="canonicalName" value="100515332"/>
    <att type="list" name="cytoscape.alias.list">
      <att type="string" name="cytoscape.alias.list" value="100515332"/>
    </att>
    <att type="string" name="geneName" value="LOC100515332"/>
    <att type="string" name="id" value="100515332"/>
    <graphics type="ELLIPSE" h="40.0" w="40.0" x="1546.0172119140625" y="1667.158203125" fill="#ccccff" width="1" outline="#666666" cy:nodeTransparency="1.0" cy:nodeLabelFont="SansSerif.bold-0-12" cy:nodeLabel="LOC100515332" cy:borderLineType="solid"/>
  </node>
  <node label="100516797" id="-431">
    <att type="string" name="canonicalName" value="100516797"/>
    <att type="list" name="cytoscape.alias.list">
      <att type="string" name="cytoscape.alias.list" value="100516797"/>
    </att>
    <att type="string" name="geneName" value="NT5C1B"/>
    <att type="string" name="id" value="100516797"/>
    <graphics type="ELLIPSE" h="40.0" w="40.0" x="1722.184326171875" y="1548.2091064453125" fill="#ccccff" width="1" outline="#666666" cy:nodeTransparency="1.0" cy:nodeLabelFont="SansSerif.bold-0-12" cy:nodeLabel="NT5C1B" cy:borderLineType="solid"/>
  </node>
  <node label="100623678" id="-430">
    <att type="string" name="canonicalName" value="100623678"/>
    <att type="list" name="cytoscape.alias.list">
      <att type="string" name="cytoscape.alias.list" value="100623678"/>
    </att>
    <att type="string" name="geneName" value="LOC100623678"/>
    <att type="string" name="id" value="100623678"/>
    <graphics type="ELLIPSE" h="40.0" w="40.0" x="1786.984375" y="1570.34814453125" fill="#ccccff" width="1" outline="#666666" cy:nodeTransparency="1.0" cy:nodeLabelFont="SansSerif.bold-0-12" cy:nodeLabel="LOC100623678" cy:borderLineType="solid"/>
  </node>
  <node label="100157138" id="-429">
    <att type="string" name="canonicalName" value="100157138"/>
    <att type="list" name="cytoscape.alias.list">
      <att type="string" name="cytoscape.alias.list" value="100157138"/>
    </att>
    <att type="string" name="geneName" value="PNP"/>
    <att type="string" name="id" value="100157138"/>
    <graphics type="ELLIPSE" h="40.0" w="40.0" x="1688.4654541015625" y="1425.716064453125" fill="#ccccff" width="1" outline="#666666" cy:nodeTransparency="1.0" cy:nodeLabelFont="SansSerif.bold-0-12" cy:nodeLabel="PNP" cy:borderLineType="solid"/>
  </node>
  <node label="100526240" id="-428">
    <att type="string" name="canonicalName" value="100526240"/>
    <att type="list" name="cytoscape.alias.list">
      <att type="string" name="cytoscape.alias.list" value="100526240"/>
    </att>
    <att type="string" name="geneName" value="LOC100526240"/>
    <att type="string" name="id" value="100526240"/>
    <graphics type="ELLIPSE" h="40.0" w="40.0" x="1518.292724609375" y="1606.539794921875" fill="#ccccff" width="1" outline="#666666" cy:nodeTransparency="1.0" cy:nodeLabelFont="SansSerif.bold-0-12" cy:nodeLabel="LOC100526240" cy:borderLineType="solid"/>
  </node>
  <node label="100525664" id="-427">
    <att type="string" name="canonicalName" value="100525664"/>
    <att type="list" name="cytoscape.alias.list">
      <att type="string" name="cytoscape.alias.list" value="100525664"/>
    </att>
    <att type="string" name="geneName" value="SYNJ1"/>
    <att type="string" name="id" value="100525664"/>
    <graphics type="ELLIPSE" h="40.0" w="40.0" x="2044.36865234375" y="2539.84521484375" fill="#ccccff" width="1" outline="#666666" cy:nodeTransparency="1.0" cy:nodeLabelFont="SansSerif.bold-0-12" cy:nodeLabel="SYNJ1" cy:borderLineType="solid"/>
  </node>
  <node label="100157641" id="-426">
    <att type="string" name="canonicalName" value="100157641"/>
    <att type="list" name="cytoscape.alias.list">
      <att type="string" name="cytoscape.alias.list" value="100157641"/>
    </att>
    <att type="string" name="geneName" value="PLCB2"/>
    <att type="string" name="id" value="100157641"/>
    <graphics type="ELLIPSE" h="40.0" w="40.0" x="2028.855224609375" y="2429.2001953125" fill="#ccccff" width="1" outline="#666666" cy:nodeTransparency="1.0" cy:nodeLabelFont="SansSerif.bold-0-12" cy:nodeLabel="PLCB2" cy:borderLineType="solid"/>
  </node>
  <node label="100622663" id="-425">
    <att type="string" name="canonicalName" value="100622663"/>
    <att type="list" name="cytoscape.alias.list">
      <att type="string" name="cytoscape.alias.list" value="100622663"/>
    </att>
    <att type="string" name="geneName" value="PIK3CB"/>
    <att type="string" name="id" value="100622663"/>
    <graphics type="ELLIPSE" h="40.0" w="40.0" x="2120.08935546875" y="2387.4912109375" fill="#ccccff" width="1" outline="#666666" cy:nodeTransparency="1.0" cy:nodeLabelFont="SansSerif.bold-0-12" cy:nodeLabel="PIK3CB" cy:borderLineType="solid"/>
  </node>
  <node label="100512501" id="-424">
    <att type="string" name="canonicalName" value="100512501"/>
    <att type="list" name="cytoscape.alias.list">
      <att type="string" name="cytoscape.alias.list" value="100512501"/>
    </att>
    <att type="string" name="geneName" value="INPP5A"/>
    <att type="string" name="id" value="100512501"/>
    <graphics type="ELLIPSE" h="40.0" w="40.0" x="1432.6995849609375" y="6573.18896484375" fill="#ccccff" width="1" outline="#666666" cy:nodeTransparency="1.0" cy:nodeLabelFont="SansSerif.bold-0-12" cy:nodeLabel="INPP5A" cy:borderLineType="solid"/>
  </node>
  <node label="397454" id="-423">
    <att type="string" name="canonicalName" value="397454"/>
    <att type="list" name="cytoscape.alias.list">
      <att type="string" name="cytoscape.alias.list" value="397454"/>
    </att>
    <att type="string" name="geneName" value="ITPR1"/>
    <att type="string" name="id" value="397454"/>
    <graphics type="ELLIPSE" h="40.0" w="40.0" x="1429.90283203125" y="6680.9169921875" fill="#ccccff" width="1" outline="#666666" cy:nodeTransparency="1.0" cy:nodeLabelFont="SansSerif.bold-0-12" cy:nodeLabel="ITPR1" cy:borderLineType="solid"/>
  </node>
  <node label="100152679" id="-422">
    <att type="string" name="canonicalName" value="100152679"/>
    <att type="list" name="cytoscape.alias.list">
      <att type="string" name="cytoscape.alias.list" value="100152679"/>
    </att>
    <att type="string" name="geneName" value="PLCB1"/>
    <att type="string" name="id" value="100152679"/>
    <graphics type="ELLIPSE" h="40.0" w="40.0" x="1986.7720947265625" y="2474.5439453125" fill="#ccccff" width="1" outline="#666666" cy:nodeTransparency="1.0" cy:nodeLabelFont="SansSerif.bold-0-12" cy:nodeLabel="PLCB1" cy:borderLineType="solid"/>
  </node>
  <node label="100521111" id="-421">
    <att type="string" name="canonicalName" value="100521111"/>
    <att type="list" name="cytoscape.alias.list">
      <att type="string" name="cytoscape.alias.list" value="100521111"/>
    </att>
    <att type="string" name="geneName" value="PLCD3"/>
    <att type="string" name="id" value="100521111"/>
    <graphics type="ELLIPSE" h="40.0" w="40.0" x="2049.3173828125" y="2350.011474609375" fill="#ccccff" width="1" outline="#666666" cy:nodeTransparency="1.0" cy:nodeLabelFont="SansSerif.bold-0-12" cy:nodeLabel="PLCD3" cy:borderLineType="solid"/>
  </node>
  <node label="100516167" id="-420">
    <att type="string" name="canonicalName" value="100516167"/>
    <att type="list" name="cytoscape.alias.list">
      <att type="string" name="cytoscape.alias.list" value="100516167"/>
    </att>
    <att type="string" name="geneName" value="SYNJ2"/>
    <att type="string" name="id" value="100516167"/>
    <graphics type="ELLIPSE" h="40.0" w="40.0" x="1893.37353515625" y="2483.67724609375" fill="#ccccff" width="1" outline="#666666" cy:nodeTransparency="1.0" cy:nodeLabelFont="SansSerif.bold-0-12" cy:nodeLabel="SYNJ2" cy:borderLineType="solid"/>
  </node>
  <node label="397632" id="-419">
    <att type="string" name="canonicalName" value="397632"/>
    <att type="list" name="cytoscape.alias.list">
      <att type="string" name="cytoscape.alias.list" value="397632"/>
    </att>
    <att type="string" name="geneName" value="PLCZ"/>
    <att type="string" name="id" value="397632"/>
    <graphics type="ELLIPSE" h="40.0" w="40.0" x="1938.1893310546875" y="2404.1962890625" fill="#ccccff" width="1" outline="#666666" cy:nodeTransparency="1.0" cy:nodeLabelFont="SansSerif.bold-0-12" cy:nodeLabel="PLCZ" cy:borderLineType="solid"/>
  </node>
  <node label="100521167" id="-418">
    <att type="string" name="canonicalName" value="100521167"/>
    <att type="list" name="cytoscape.alias.list">
      <att type="string" name="cytoscape.alias.list" value="100521167"/>
    </att>
    <att type="string" name="geneName" value="LOC100521167"/>
    <att type="string" name="id" value="100521167"/>
    <graphics type="ELLIPSE" h="40.0" w="40.0" x="2144.492919921875" y="2237.83837890625" fill="#ccccff" width="1" outline="#666666" cy:nodeTransparency="1.0" cy:nodeLabelFont="SansSerif.bold-0-12" cy:nodeLabel="LOC100521167" cy:borderLineType="solid"/>
  </node>
  <node label="100512551" id="-417">
    <att type="string" name="canonicalName" value="100512551"/>
    <att type="list" name="cytoscape.alias.list">
      <att type="string" name="cytoscape.alias.list" value="100512551"/>
    </att>
    <att type="string" name="geneName" value="PIK3C2B"/>
    <att type="string" name="id" value="100512551"/>
    <graphics type="ELLIPSE" h="40.0" w="40.0" x="1970.592529296875" y="2565.44873046875" fill="#ccccff" width="1" outline="#666666" cy:nodeTransparency="1.0" cy:nodeLabelFont="SansSerif.bold-0-12" cy:nodeLabel="PIK3C2B" cy:borderLineType="solid"/>
  </node>
  <node label="100156264" id="-416">
    <att type="string" name="canonicalName" value="100156264"/>
    <att type="list" name="cytoscape.alias.list">
      <att type="string" name="cytoscape.alias.list" value="100156264"/>
    </att>
    <att type="string" name="geneName" value="PTEN"/>
    <att type="string" name="id" value="100156264"/>
    <graphics type="ELLIPSE" h="40.0" w="40.0" x="1694.2679443359375" y="2426.861328125" fill="#ccccff" width="1" outline="#666666" cy:nodeTransparency="1.0" cy:nodeLabelFont="SansSerif.bold-0-12" cy:nodeLabel="PTEN" cy:borderLineType="solid"/>
  </node>
  <node label="100520446" id="-415">
    <att type="string" name="canonicalName" value="100520446"/>
    <att type="list" name="cytoscape.alias.list">
      <att type="string" name="cytoscape.alias.list" value="100520446"/>
    </att>
    <att type="string" name="geneName" value="PIP4K2A"/>
    <att type="string" name="id" value="100520446"/>
    <graphics type="ELLIPSE" h="40.0" w="40.0" x="2305.852294921875" y="2371.34375" fill="#ccccff" width="1" outline="#666666" cy:nodeTransparency="1.0" cy:nodeLabelFont="SansSerif.bold-0-12" cy:nodeLabel="PIP4K2A" cy:borderLineType="solid"/>
  </node>
  <node label="100627099" id="-414">
    <att type="string" name="canonicalName" value="100627099"/>
    <att type="list" name="cytoscape.alias.list">
      <att type="string" name="cytoscape.alias.list" value="100627099"/>
    </att>
    <att type="string" name="geneName" value="PLCD1"/>
    <att type="string" name="id" value="100627099"/>
    <graphics type="ELLIPSE" h="40.0" w="40.0" x="2199.2353515625" y="2352.87158203125" fill="#ccccff" width="1" outline="#666666" cy:nodeTransparency="1.0" cy:nodeLabelFont="SansSerif.bold-0-12" cy:nodeLabel="PLCD1" cy:borderLineType="solid"/>
  </node>
  <node label="733582" id="-413">
    <att type="string" name="canonicalName" value="733582"/>
    <att type="list" name="cytoscape.alias.list">
      <att type="string" name="cytoscape.alias.list" value="733582"/>
    </att>
    <att type="string" name="geneName" value="CDS1"/>
    <att type="string" name="id" value="733582"/>
    <graphics type="ELLIPSE" h="40.0" w="40.0" x="2414.08349609375" y="2365.54150390625" fill="#ccccff" width="1" outline="#666666" cy:nodeTransparency="1.0" cy:nodeLabelFont="SansSerif.bold-0-12" cy:nodeLabel="CDS1" cy:borderLineType="solid"/>
  </node>
  <node label="100519533" id="-412">
    <att type="string" name="canonicalName" value="100519533"/>
    <att type="list" name="cytoscape.alias.list">
      <att type="string" name="cytoscape.alias.list" value="100519533"/>
    </att>
    <att type="string" name="geneName" value="DGKZ"/>
    <att type="string" name="id" value="100519533"/>
    <graphics type="ELLIPSE" h="40.0" w="40.0" x="2333.128173828125" y="2272.94091796875" fill="#ccccff" width="1" outline="#666666" cy:nodeTransparency="1.0" cy:nodeLabelFont="SansSerif.bold-0-12" cy:nodeLabel="DGKZ" cy:borderLineType="solid"/>
  </node>
  <node label="100514878" id="-411">
    <att type="string" name="canonicalName" value="100514878"/>
    <att type="list" name="cytoscape.alias.list">
      <att type="string" name="cytoscape.alias.list" value="100514878"/>
    </att>
    <att type="string" name="geneName" value="INPP1"/>
    <att type="string" name="id" value="100514878"/>
    <graphics type="ELLIPSE" h="40.0" w="40.0" x="2020.875" y="2605.983154296875" fill="#ccccff" width="1" outline="#666666" cy:nodeTransparency="1.0" cy:nodeLabelFont="SansSerif.bold-0-12" cy:nodeLabel="INPP1" cy:borderLineType="solid"/>
  </node>
  <node label="397119" id="-410">
    <att type="string" name="canonicalName" value="397119"/>
    <att type="list" name="cytoscape.alias.list">
      <att type="string" name="cytoscape.alias.list" value="397119"/>
    </att>
    <att type="string" name="geneName" value="PLCD4"/>
    <att type="string" name="id" value="397119"/>
    <graphics type="ELLIPSE" h="40.0" w="40.0" x="2100.384521484375" y="2691.133544921875" fill="#ccccff" width="1" outline="#666666" cy:nodeTransparency="1.0" cy:nodeLabelFont="SansSerif.bold-0-12" cy:nodeLabel="PLCD4" cy:borderLineType="solid"/>
  </node>
  <node label="100462756" id="-409">
    <att type="string" name="canonicalName" value="100462756"/>
    <att type="list" name="cytoscape.alias.list">
      <att type="string" name="cytoscape.alias.list" value="100462756"/>
    </att>
    <att type="string" name="geneName" value="INPP5K"/>
    <att type="string" name="id" value="100462756"/>
    <graphics type="ELLIPSE" h="40.0" w="40.0" x="1876.515380859375" y="2600.88134765625" fill="#ccccff" width="1" outline="#666666" cy:nodeTransparency="1.0" cy:nodeLabelFont="SansSerif.bold-0-12" cy:nodeLabel="INPP5K" cy:borderLineType="solid"/>
  </node>
  <node label="100521692" id="-408">
    <att type="string" name="canonicalName" value="100521692"/>
    <att type="list" name="cytoscape.alias.list">
      <att type="string" name="cytoscape.alias.list" value="100521692"/>
    </att>
    <att type="string" name="geneName" value="PIKFYVE"/>
    <att type="string" name="id" value="100521692"/>
    <graphics type="ELLIPSE" h="40.0" w="40.0" x="2285.45703125" y="2842.215087890625" fill="#ccccff" width="1" outline="#666666" cy:nodeTransparency="1.0" cy:nodeLabelFont="SansSerif.bold-0-12" cy:nodeLabel="PIKFYVE" cy:borderLineType="solid"/>
  </node>
  <node label="100156925" id="-407">
    <att type="string" name="canonicalName" value="100156925"/>
    <att type="list" name="cytoscape.alias.list">
      <att type="string" name="cytoscape.alias.list" value="100156925"/>
    </att>
    <att type="string" name="geneName" value="IMPAD1"/>
    <att type="string" name="id" value="100156925"/>
    <graphics type="ELLIPSE" h="40.0" w="40.0" x="2122.1142578125" y="2452.66650390625" fill="#ccccff" width="1" outline="#666666" cy:nodeTransparency="1.0" cy:nodeLabelFont="SansSerif.bold-0-12" cy:nodeLabel="IMPAD1" cy:borderLineType="solid"/>
  </node>
  <node label="100157143" id="-406">
    <att type="string" name="canonicalName" value="100157143"/>
    <att type="list" name="cytoscape.alias.list">
      <att type="string" name="cytoscape.alias.list" value="100157143"/>
    </att>
    <att type="string" name="geneName" value="PI4KA"/>
    <att type="string" name="id" value="100157143"/>
    <graphics type="ELLIPSE" h="40.0" w="40.0" x="2387.09521484375" y="2698.1982421875" fill="#ccccff" width="1" outline="#666666" cy:nodeTransparency="1.0" cy:nodeLabelFont="SansSerif.bold-0-12" cy:nodeLabel="PI4KA" cy:borderLineType="solid"/>
  </node>
  <node label="100524726" id="-405">
    <att type="string" name="canonicalName" value="100524726"/>
    <att type="list" name="cytoscape.alias.list">
      <att type="string" name="cytoscape.alias.list" value="100524726"/>
    </att>
    <att type="string" name="geneName" value="OCRL"/>
    <att type="string" name="id" value="100524726"/>
    <graphics type="ELLIPSE" h="40.0" w="40.0" x="1233.0751953125" y="2466.921875" fill="#ccccff" width="1" outline="#666666" cy:nodeTransparency="1.0" cy:nodeLabelFont="SansSerif.bold-0-12" cy:nodeLabel="OCRL" cy:borderLineType="solid"/>
  </node>
  <node label="100521362" id="-404">
    <att type="string" name="canonicalName" value="100521362"/>
    <att type="list" name="cytoscape.alias.list">
      <att type="string" name="cytoscape.alias.list" value="100521362"/>
    </att>
    <att type="string" name="geneName" value="PIP5K1C"/>
    <att type="string" name="id" value="100521362"/>
    <graphics type="ELLIPSE" h="40.0" w="40.0" x="1337.826416015625" y="2415.012451171875" fill="#ccccff" width="1" outline="#666666" cy:nodeTransparency="1.0" cy:nodeLabelFont="SansSerif.bold-0-12" cy:nodeLabel="PIP5K1C" cy:borderLineType="solid"/>
  </node>
  <node label="100524376" id="-403">
    <att type="string" name="canonicalName" value="100524376"/>
    <att type="list" name="cytoscape.alias.list">
      <att type="string" name="cytoscape.alias.list" value="100524376"/>
    </att>
    <att type="string" name="geneName" value="ITPKC"/>
    <att type="string" name="id" value="100524376"/>
    <graphics type="ELLIPSE" h="40.0" w="40.0" x="2590.666748046875" y="2807.6689453125" fill="#ccccff" width="1" outline="#666666" cy:nodeTransparency="1.0" cy:nodeLabelFont="SansSerif.bold-0-12" cy:nodeLabel="ITPKC" cy:borderLineType="solid"/>
  </node>
  <node label="100623875" id="-402">
    <att type="string" name="canonicalName" value="100623875"/>
    <att type="list" name="cytoscape.alias.list">
      <att type="string" name="cytoscape.alias.list" value="100623875"/>
    </att>
    <att type="string" name="geneName" value="LOC100623875"/>
    <att type="string" name="id" value="100623875"/>
    <graphics type="ELLIPSE" h="40.0" w="40.0" x="1291.8740234375" y="2521.4599609375" fill="#ccccff" width="1" outline="#666666" cy:nodeTransparency="1.0" cy:nodeLabelFont="SansSerif.bold-0-12" cy:nodeLabel="LOC100623875" cy:borderLineType="solid"/>
  </node>
  <node label="100516581" id="-401">
    <att type="string" name="canonicalName" value="100516581"/>
    <att type="list" name="cytoscape.alias.list">
      <att type="string" name="cytoscape.alias.list" value="100516581"/>
    </att>
    <att type="string" name="geneName" value="LOC100516581"/>
    <att type="string" name="id" value="100516581"/>
    <graphics type="ELLIPSE" h="40.0" w="40.0" x="1467.917236328125" y="2451.7900390625" fill="#ccccff" width="1" outline="#666666" cy:nodeTransparency="1.0" cy:nodeLabelFont="SansSerif.bold-0-12" cy:nodeLabel="LOC100516581" cy:borderLineType="solid"/>
  </node>
  <node label="100624272" id="-400">
    <att type="string" name="canonicalName" value="100624272"/>
    <att type="list" name="cytoscape.alias.list">
      <att type="string" name="cytoscape.alias.list" value="100624272"/>
    </att>
    <att type="string" name="geneName" value="PIP5K1A"/>
    <att type="string" name="id" value="100624272"/>
    <graphics type="ELLIPSE" h="40.0" w="40.0" x="809.7611083984375" y="2872.480224609375" fill="#ccccff" width="1" outline="#666666" cy:nodeTransparency="1.0" cy:nodeLabelFont="SansSerif.bold-0-12" cy:nodeLabel="PIP5K1A" cy:borderLineType="solid"/>
  </node>
  <node label="100511937" id="-399">
    <att type="string" name="canonicalName" value="100511937"/>
    <att type="list" name="cytoscape.alias.list">
      <att type="string" name="cytoscape.alias.list" value="100511937"/>
    </att>
    <att type="string" name="geneName" value="PIK3R3"/>
    <att type="string" name="id" value="100511937"/>
    <graphics type="ELLIPSE" h="40.0" w="40.0" x="930.48046875" y="2881.389892578125" fill="#ccccff" width="1" outline="#666666" cy:nodeTransparency="1.0" cy:nodeLabelFont="SansSerif.bold-0-12" cy:nodeLabel="PIK3R3" cy:borderLineType="solid"/>
  </node>
  <node label="100156778" id="-398">
    <att type="string" name="canonicalName" value="100156778"/>
    <att type="list" name="cytoscape.alias.list">
      <att type="string" name="cytoscape.alias.list" value="100156778"/>
    </att>
    <att type="string" name="geneName" value="PI4KB"/>
    <att type="string" name="id" value="100156778"/>
    <graphics type="ELLIPSE" h="40.0" w="40.0" x="2168.034912109375" y="2838.136474609375" fill="#ccccff" width="1" outline="#666666" cy:nodeTransparency="1.0" cy:nodeLabelFont="SansSerif.bold-0-12" cy:nodeLabel="PI4KB" cy:borderLineType="solid"/>
  </node>
  <node label="397097" id="-397">
    <att type="string" name="canonicalName" value="397097"/>
    <att type="list" name="cytoscape.alias.list">
      <att type="string" name="cytoscape.alias.list" value="397097"/>
    </att>
    <att type="string" name="geneName" value="DGKA"/>
    <att type="string" name="id" value="397097"/>
    <graphics type="ELLIPSE" h="40.0" w="40.0" x="2035.30322265625" y="2820.26708984375" fill="#ccccff" width="1" outline="#666666" cy:nodeTransparency="1.0" cy:nodeLabelFont="SansSerif.bold-0-12" cy:nodeLabel="DGKA" cy:borderLineType="solid"/>
  </node>
  <node label="100516892" id="-396">
    <att type="string" name="canonicalName" value="100516892"/>
    <att type="list" name="cytoscape.alias.list">
      <att type="string" name="cytoscape.alias.list" value="100516892"/>
    </att>
    <att type="string" name="geneName" value="MTM1"/>
    <att type="string" name="id" value="100516892"/>
    <graphics type="ELLIPSE" h="40.0" w="40.0" x="1149.30419921875" y="2586.53173828125" fill="#ccccff" width="1" outline="#666666" cy:nodeTransparency="1.0" cy:nodeLabelFont="SansSerif.bold-0-12" cy:nodeLabel="MTM1" cy:borderLineType="solid"/>
  </node>
  <node label="503700" id="-395">
    <att type="string" name="canonicalName" value="503700"/>
    <att type="list" name="cytoscape.alias.list">
      <att type="string" name="cytoscape.alias.list" value="503700"/>
    </att>
    <att type="string" name="geneName" value="PIK3C3"/>
    <att type="string" name="id" value="503700"/>
    <graphics type="ELLIPSE" h="40.0" w="40.0" x="1025.287841796875" y="2622.530517578125" fill="#ccccff" width="1" outline="#666666" cy:nodeTransparency="1.0" cy:nodeLabelFont="SansSerif.bold-0-12" cy:nodeLabel="PIK3C3" cy:borderLineType="solid"/>
  </node>
  <node label="397057" id="-394">
    <att type="string" name="canonicalName" value="397057"/>
    <att type="list" name="cytoscape.alias.list">
      <att type="string" name="cytoscape.alias.list" value="397057"/>
    </att>
    <att type="string" name="geneName" value="IL18"/>
    <att type="string" name="id" value="397057"/>
    <graphics type="ELLIPSE" h="40.0" w="40.0" x="1664.3245849609375" y="1027.9710693359375" fill="#ccccff" width="1" outline="#666666" cy:nodeTransparency="1.0" cy:nodeLabelFont="SansSerif.bold-0-12" cy:nodeLabel="IL18" cy:borderLineType="solid"/>
  </node>
  <node label="100738292" id="-393">
    <att type="string" name="canonicalName" value="100738292"/>
    <att type="list" name="cytoscape.alias.list">
      <att type="string" name="cytoscape.alias.list" value="100738292"/>
    </att>
    <att type="string" name="geneName" value="LOC100738292"/>
    <att type="string" name="id" value="100738292"/>
    <graphics type="ELLIPSE" h="40.0" w="40.0" x="941.6702880859375" y="2399.345458984375" fill="#ccccff" width="1" outline="#666666" cy:nodeTransparency="1.0" cy:nodeLabelFont="SansSerif.bold-0-12" cy:nodeLabel="LOC100738292" cy:borderLineType="solid"/>
  </node>
  <node label="396609" id="-392">
    <att type="string" name="canonicalName" value="396609"/>
    <att type="list" name="cytoscape.alias.list">
      <att type="string" name="cytoscape.alias.list" value="396609"/>
    </att>
    <att type="string" name="geneName" value="MAPK9"/>
    <att type="string" name="id" value="396609"/>
    <graphics type="ELLIPSE" h="40.0" w="40.0" x="1613.9375" y="766.307373046875" fill="#ccccff" width="1" outline="#666666" cy:nodeTransparency="1.0" cy:nodeLabelFont="SansSerif.bold-0-12" cy:nodeLabel="MAPK9" cy:borderLineType="solid"/>
  </node>
  <node label="445528" id="-391">
    <att type="string" name="canonicalName" value="445528"/>
    <att type="list" name="cytoscape.alias.list">
      <att type="string" name="cytoscape.alias.list" value="445528"/>
    </att>
    <att type="string" name="geneName" value="SLA-DMA"/>
    <att type="string" name="id" value="445528"/>
    <graphics type="ELLIPSE" h="40.0" w="40.0" x="208.08087158203125" y="5450.66015625" fill="#ccccff" width="1" outline="#666666" cy:nodeTransparency="1.0" cy:nodeLabelFont="SansSerif.bold-0-12" cy:nodeLabel="SLA-DMA" cy:borderLineType="solid"/>
  </node>
  <node label="100157587" id="-390">
    <att type="string" name="canonicalName" value="100157587"/>
    <att type="list" name="cytoscape.alias.list">
      <att type="string" name="cytoscape.alias.list" value="100157587"/>
    </att>
    <att type="string" name="geneName" value="NFYB"/>
    <att type="string" name="id" value="100157587"/>
    <graphics type="ELLIPSE" h="40.0" w="40.0" x="141.38906860351562" y="5354.4287109375" fill="#ccccff" width="1" outline="#666666" cy:nodeTransparency="1.0" cy:nodeLabelFont="SansSerif.bold-0-12" cy:nodeLabel="NFYB" cy:borderLineType="solid"/>
  </node>
  <node label="100525048" id="-389">
    <att type="string" name="canonicalName" value="100525048"/>
    <att type="list" name="cytoscape.alias.list">
      <att type="string" name="cytoscape.alias.list" value="100525048"/>
    </att>
    <att type="string" name="geneName" value="LOC100525048"/>
    <att type="string" name="id" value="100525048"/>
    <graphics type="ELLIPSE" h="40.0" w="40.0" x="465.1966247558594" y="5407.60595703125" fill="#ccccff" width="1" outline="#666666" cy:nodeTransparency="1.0" cy:nodeLabelFont="SansSerif.bold-0-12" cy:nodeLabel="LOC100525048" cy:borderLineType="solid"/>
  </node>
  <node label="100622795" id="-388">
    <att type="string" name="canonicalName" value="100622795"/>
    <att type="list" name="cytoscape.alias.list">
      <att type="string" name="cytoscape.alias.list" value="100622795"/>
    </att>
    <att type="string" name="geneName" value="LOC100622795"/>
    <att type="string" name="id" value="100622795"/>
    <graphics type="ELLIPSE" h="40.0" w="40.0" x="528.1243286132812" y="5307.01318359375" fill="#ccccff" width="1" outline="#666666" cy:nodeTransparency="1.0" cy:nodeLabelFont="SansSerif.bold-0-12" cy:nodeLabel="LOC100622795" cy:borderLineType="solid"/>
  </node>
  <node label="100521769" id="-387">
    <att type="string" name="canonicalName" value="100521769"/>
    <att type="list" name="cytoscape.alias.list">
      <att type="string" name="cytoscape.alias.list" value="100521769"/>
    </att>
    <att type="string" name="geneName" value="TCIRG1"/>
    <att type="string" name="id" value="100521769"/>
    <graphics type="ELLIPSE" h="40.0" w="40.0" x="640.8983154296875" y="5235.294921875" fill="#ccccff" width="1" outline="#666666" cy:nodeTransparency="1.0" cy:nodeLabelFont="SansSerif.bold-0-12" cy:nodeLabel="TCIRG1" cy:borderLineType="solid"/>
  </node>
  <node label="100154598" id="-386">
    <att type="string" name="canonicalName" value="100154598"/>
    <att type="list" name="cytoscape.alias.list">
      <att type="string" name="cytoscape.alias.list" value="100154598"/>
    </att>
    <att type="string" name="geneName" value="LAMP2"/>
    <att type="string" name="id" value="100154598"/>
    <graphics type="ELLIPSE" h="40.0" w="40.0" x="463.445556640625" y="5208.9765625" fill="#ccccff" width="1" outline="#666666" cy:nodeTransparency="1.0" cy:nodeLabelFont="SansSerif.bold-0-12" cy:nodeLabel="LAMP2" cy:borderLineType="solid"/>
  </node>
  <node label="100518959" id="-385">
    <att type="string" name="canonicalName" value="100518959"/>
    <att type="list" name="cytoscape.alias.list">
      <att type="string" name="cytoscape.alias.list" value="100518959"/>
    </att>
    <att type="string" name="geneName" value="LOC100518959"/>
    <att type="string" name="id" value="100518959"/>
    <graphics type="ELLIPSE" h="40.0" w="40.0" x="582.9752197265625" y="5412.3603515625" fill="#ccccff" width="1" outline="#666666" cy:nodeTransparency="1.0" cy:nodeLabelFont="SansSerif.bold-0-12" cy:nodeLabel="LOC100518959" cy:borderLineType="solid"/>
  </node>
  <node label="100154525" id="-384">
    <att type="string" name="canonicalName" value="100154525"/>
    <att type="list" name="cytoscape.alias.list">
      <att type="string" name="cytoscape.alias.list" value="100154525"/>
    </att>
    <att type="string" name="geneName" value="ATP6V0A2"/>
    <att type="string" name="id" value="100154525"/>
    <graphics type="ELLIPSE" h="40.0" w="40.0" x="409.1038818359375" y="5308.76416015625" fill="#ccccff" width="1" outline="#666666" cy:nodeTransparency="1.0" cy:nodeLabelFont="SansSerif.bold-0-12" cy:nodeLabel="ATP6V0A2" cy:borderLineType="solid"/>
  </node>
  <node label="100153386" id="-383">
    <att type="string" name="canonicalName" value="100153386"/>
    <att type="list" name="cytoscape.alias.list">
      <att type="string" name="cytoscape.alias.list" value="100153386"/>
    </att>
    <att type="string" name="geneName" value="SLA-DRB1"/>
    <att type="string" name="id" value="100153386"/>
    <graphics type="ELLIPSE" h="40.0" w="40.0" x="65.77244567871094" y="5442.38232421875" fill="#ccccff" width="1" outline="#666666" cy:nodeTransparency="1.0" cy:nodeLabelFont="SansSerif.bold-0-12" cy:nodeLabel="SLA-DRB1" cy:borderLineType="solid"/>
  </node>
  <node label="100155304" id="-382">
    <att type="string" name="canonicalName" value="100155304"/>
    <att type="list" name="cytoscape.alias.list">
      <att type="string" name="cytoscape.alias.list" value="100155304"/>
    </att>
    <att type="string" name="geneName" value="SMAD2"/>
    <att type="string" name="id" value="100155304"/>
    <graphics type="ELLIPSE" h="40.0" w="40.0" x="1518.452880859375" y="2850.588134765625" fill="#ccccff" width="1" outline="#666666" cy:nodeTransparency="1.0" cy:nodeLabelFont="SansSerif.bold-0-12" cy:nodeLabel="SMAD2" cy:borderLineType="solid"/>
  </node>
  <node label="494013" id="-381">
    <att type="string" name="canonicalName" value="494013"/>
    <att type="list" name="cytoscape.alias.list">
      <att type="string" name="cytoscape.alias.list" value="494013"/>
    </att>
    <att type="string" name="geneName" value="CD3G"/>
    <att type="string" name="id" value="494013"/>
    <graphics type="ELLIPSE" h="40.0" w="40.0" x="1329.90283203125" y="6573.18896484375" fill="#ccccff" width="1" outline="#666666" cy:nodeTransparency="1.0" cy:nodeLabelFont="SansSerif.bold-0-12" cy:nodeLabel="CD3G" cy:borderLineType="solid"/>
  </node>
  <node label="100513491" id="-380">
    <att type="string" name="canonicalName" value="100513491"/>
    <att type="list" name="cytoscape.alias.list">
      <att type="string" name="cytoscape.alias.list" value="100513491"/>
    </att>
    <att type="string" name="geneName" value="MAP3K3"/>
    <att type="string" name="id" value="100513491"/>
    <graphics type="ELLIPSE" h="40.0" w="40.0" x="1328.0859375" y="6680.93798828125" fill="#ccccff" width="1" outline="#666666" cy:nodeTransparency="1.0" cy:nodeLabelFont="SansSerif.bold-0-12" cy:nodeLabel="MAP3K3" cy:borderLineType="solid"/>
  </node>
  <node label="100625423" id="-379">
    <att type="string" name="canonicalName" value="100625423"/>
    <att type="list" name="cytoscape.alias.list">
      <att type="string" name="cytoscape.alias.list" value="100625423"/>
    </att>
    <att type="string" name="geneName" value="ADCY9"/>
    <att type="string" name="id" value="100625423"/>
    <graphics type="ELLIPSE" h="40.0" w="40.0" x="2217.08056640625" y="1586.1829833984375" fill="#ccccff" width="1" outline="#666666" cy:nodeTransparency="1.0" cy:nodeLabelFont="SansSerif.bold-0-12" cy:nodeLabel="ADCY9" cy:borderLineType="solid"/>
  </node>
  <node label="100153078" id="-378">
    <att type="string" name="canonicalName" value="100153078"/>
    <att type="list" name="cytoscape.alias.list">
      <att type="string" name="cytoscape.alias.list" value="100153078"/>
    </att>
    <att type="string" name="geneName" value="FZD3"/>
    <att type="string" name="id" value="100153078"/>
    <graphics type="ELLIPSE" h="40.0" w="40.0" x="1226.5706787109375" y="6573.18896484375" fill="#ccccff" width="1" outline="#666666" cy:nodeTransparency="1.0" cy:nodeLabelFont="SansSerif.bold-0-12" cy:nodeLabel="FZD3" cy:borderLineType="solid"/>
  </node>
  <node label="100520560" id="-377">
    <att type="string" name="canonicalName" value="100520560"/>
    <att type="list" name="cytoscape.alias.list">
      <att type="string" name="cytoscape.alias.list" value="100520560"/>
    </att>
    <att type="string" name="geneName" value="WNT2B"/>
    <att type="string" name="id" value="100520560"/>
    <graphics type="ELLIPSE" h="40.0" w="40.0" x="1228.0859375" y="6680.9423828125" fill="#ccccff" width="1" outline="#666666" cy:nodeTransparency="1.0" cy:nodeLabelFont="SansSerif.bold-0-12" cy:nodeLabel="WNT2B" cy:borderLineType="solid"/>
  </node>
  <node label="100514402" id="-376">
    <att type="string" name="canonicalName" value="100514402"/>
    <att type="list" name="cytoscape.alias.list">
      <att type="string" name="cytoscape.alias.list" value="100514402"/>
    </att>
    <att type="string" name="geneName" value="ADCY8"/>
    <att type="string" name="id" value="100514402"/>
    <graphics type="ELLIPSE" h="40.0" w="40.0" x="1967.7445068359375" y="1585.98779296875" fill="#ccccff" width="1" outline="#666666" cy:nodeTransparency="1.0" cy:nodeLabelFont="SansSerif.bold-0-12" cy:nodeLabel="ADCY8" cy:borderLineType="solid"/>
  </node>
  <node label="100514518" id="-375">
    <att type="string" name="canonicalName" value="100514518"/>
    <att type="list" name="cytoscape.alias.list">
      <att type="string" name="cytoscape.alias.list" value="100514518"/>
    </att>
    <att type="string" name="geneName" value="LOC100514518"/>
    <att type="string" name="id" value="100514518"/>
    <graphics type="ELLIPSE" h="40.0" w="40.0" x="96.15573120117188" y="6279.349609375" fill="#ccccff" width="1" outline="#666666" cy:nodeTransparency="1.0" cy:nodeLabelFont="SansSerif.bold-0-12" cy:nodeLabel="LOC100514518" cy:borderLineType="solid"/>
  </node>
  <node label="397601" id="-374">
    <att type="string" name="canonicalName" value="397601"/>
    <att type="list" name="cytoscape.alias.list">
      <att type="string" name="cytoscape.alias.list" value="397601"/>
    </att>
    <att type="string" name="geneName" value="ARAF"/>
    <att type="string" name="id" value="397601"/>
    <graphics type="ELLIPSE" h="40.0" w="40.0" x="1475.0621337890625" y="667.0992431640625" fill="#ccccff" width="1" outline="#666666" cy:nodeTransparency="1.0" cy:nodeLabelFont="SansSerif.bold-0-12" cy:nodeLabel="ARAF" cy:borderLineType="solid"/>
  </node>
  <node label="100621324" id="-373">
    <att type="string" name="canonicalName" value="100621324"/>
    <att type="list" name="cytoscape.alias.list">
      <att type="string" name="cytoscape.alias.list" value="100621324"/>
    </att>
    <att type="string" name="geneName" value="LOC100621324"/>
    <att type="string" name="id" value="100621324"/>
    <graphics type="ELLIPSE" h="40.0" w="40.0" x="1815.3267822265625" y="269.5496826171875" fill="#ccccff" width="1" outline="#666666" cy:nodeTransparency="1.0" cy:nodeLabelFont="SansSerif.bold-0-12" cy:nodeLabel="LOC100621324" cy:borderLineType="solid"/>
  </node>
  <node label="100511321" id="-372">
    <att type="string" name="canonicalName" value="100511321"/>
    <att type="list" name="cytoscape.alias.list">
      <att type="string" name="cytoscape.alias.list" value="100511321"/>
    </att>
    <att type="string" name="geneName" value="HSF1"/>
    <att type="string" name="id" value="100511321"/>
    <graphics type="ELLIPSE" h="40.0" w="40.0" x="1910.9285888671875" y="177.54931640625" fill="#ccccff" width="1" outline="#666666" cy:nodeTransparency="1.0" cy:nodeLabelFont="SansSerif.bold-0-12" cy:nodeLabel="HSF1" cy:borderLineType="solid"/>
  </node>
  <node label="574059" id="-371">
    <att type="string" name="canonicalName" value="574059"/>
    <att type="list" name="cytoscape.alias.list">
      <att type="string" name="cytoscape.alias.list" value="574059"/>
    </att>
    <att type="string" name="geneName" value="EEF1A1"/>
    <att type="string" name="id" value="574059"/>
    <graphics type="ELLIPSE" h="40.0" w="40.0" x="2006.196533203125" y="105.832275390625" fill="#ccccff" width="1" outline="#666666" cy:nodeTransparency="1.0" cy:nodeLabelFont="SansSerif.bold-0-12" cy:nodeLabel="EEF1A1" cy:borderLineType="solid"/>
  </node>
  <node label="100144419" id="-370">
    <att type="string" name="canonicalName" value="100144419"/>
    <att type="list" name="cytoscape.alias.list">
      <att type="string" name="cytoscape.alias.list" value="100144419"/>
    </att>
    <att type="string" name="geneName" value="GBI1"/>
    <att type="string" name="id" value="100144419"/>
    <graphics type="ELLIPSE" h="40.0" w="40.0" x="2220.02734375" y="2782.9091796875" fill="#ccccff" width="1" outline="#666666" cy:nodeTransparency="1.0" cy:nodeLabelFont="SansSerif.bold-0-12" cy:nodeLabel="GBI1" cy:borderLineType="solid"/>
  </node>
  <node label="100144421" id="-369">
    <att type="string" name="canonicalName" value="100144421"/>
    <att type="list" name="cytoscape.alias.list">
      <att type="string" name="cytoscape.alias.list" value="100144421"/>
    </att>
    <att type="string" name="geneName" value="GNAI3"/>
    <att type="string" name="id" value="100144421"/>
    <graphics type="ELLIPSE" h="40.0" w="40.0" x="2019.478759765625" y="2134.599365234375" fill="#ccccff" width="1" outline="#666666" cy:nodeTransparency="1.0" cy:nodeLabelFont="SansSerif.bold-0-12" cy:nodeLabel="GNAI3" cy:borderLineType="solid"/>
  </node>
  <node label="100739496" id="-368">
    <att type="string" name="canonicalName" value="100739496"/>
    <att type="list" name="cytoscape.alias.list">
      <att type="string" name="cytoscape.alias.list" value="100739496"/>
    </att>
    <att type="string" name="geneName" value="LOC100739496"/>
    <att type="string" name="id" value="100739496"/>
    <graphics type="ELLIPSE" h="40.0" w="40.0" x="1126.0731201171875" y="6573.18896484375" fill="#ccccff" width="1" outline="#666666" cy:nodeTransparency="1.0" cy:nodeLabelFont="SansSerif.bold-0-12" cy:nodeLabel="LOC100739496" cy:borderLineType="solid"/>
  </node>
  <node label="100158200" id="-367">
    <att type="string" name="canonicalName" value="100158200"/>
    <att type="list" name="cytoscape.alias.list">
      <att type="string" name="cytoscape.alias.list" value="100158200"/>
    </att>
    <att type="string" name="geneName" value="ITGA6"/>
    <att type="string" name="id" value="100158200"/>
    <graphics type="ELLIPSE" h="40.0" w="40.0" x="1126.5706787109375" y="6680.95166015625" fill="#ccccff" width="1" outline="#666666" cy:nodeTransparency="1.0" cy:nodeLabelFont="SansSerif.bold-0-12" cy:nodeLabel="ITGA6" cy:borderLineType="solid"/>
  </node>
  <node label="100513224" id="-366">
    <att type="string" name="canonicalName" value="100513224"/>
    <att type="list" name="cytoscape.alias.list">
      <att type="string" name="cytoscape.alias.list" value="100513224"/>
    </att>
    <att type="string" name="geneName" value="HSD17B3"/>
    <att type="string" name="id" value="100513224"/>
    <graphics type="ELLIPSE" h="40.0" w="40.0" x="1714.4283447265625" y="4943.29736328125" fill="#ccccff" width="1" outline="#666666" cy:nodeTransparency="1.0" cy:nodeLabelFont="SansSerif.bold-0-12" cy:nodeLabel="HSD17B3" cy:borderLineType="solid"/>
  </node>
  <node label="100511841" id="-365">
    <att type="string" name="canonicalName" value="100511841"/>
    <att type="list" name="cytoscape.alias.list">
      <att type="string" name="cytoscape.alias.list" value="100511841"/>
    </att>
    <att type="string" name="geneName" value="UGT1A3"/>
    <att type="string" name="id" value="100511841"/>
    <graphics type="ELLIPSE" h="40.0" w="40.0" x="1704.996337890625" y="5069.255859375" fill="#ccccff" width="1" outline="#666666" cy:nodeTransparency="1.0" cy:nodeLabelFont="SansSerif.bold-0-12" cy:nodeLabel="UGT1A3" cy:borderLineType="solid"/>
  </node>
  <node label="100624700" id="-364">
    <att type="string" name="canonicalName" value="100624700"/>
    <att type="list" name="cytoscape.alias.list">
      <att type="string" name="cytoscape.alias.list" value="100624700"/>
    </att>
    <att type="string" name="geneName" value="LOC100624700"/>
    <att type="string" name="id" value="100624700"/>
    <graphics type="ELLIPSE" h="40.0" w="40.0" x="1910.4793701171875" y="5158.83154296875" fill="#ccccff" width="1" outline="#666666" cy:nodeTransparency="1.0" cy:nodeLabelFont="SansSerif.bold-0-12" cy:nodeLabel="LOC100624700" cy:borderLineType="solid"/>
  </node>
  <node label="100154372" id="-363">
    <att type="string" name="canonicalName" value="100154372"/>
    <att type="list" name="cytoscape.alias.list">
      <att type="string" name="cytoscape.alias.list" value="100154372"/>
    </att>
    <att type="string" name="geneName" value="HSD17B8"/>
    <att type="string" name="id" value="100154372"/>
    <graphics type="ELLIPSE" h="40.0" w="40.0" x="1798.166015625" y="5135.18505859375" fill="#ccccff" width="1" outline="#666666" cy:nodeTransparency="1.0" cy:nodeLabelFont="SansSerif.bold-0-12" cy:nodeLabel="HSD17B8" cy:borderLineType="solid"/>
  </node>
  <node label="100620470" id="-362">
    <att type="string" name="canonicalName" value="100620470"/>
    <att type="list" name="cytoscape.alias.list">
      <att type="string" name="cytoscape.alias.list" value="100620470"/>
    </att>
    <att type="string" name="geneName" value="LOC100620470"/>
    <att type="string" name="id" value="100620470"/>
    <graphics type="ELLIPSE" h="40.0" w="40.0" x="1643.59130859375" y="4994.09765625" fill="#ccccff" width="1" outline="#666666" cy:nodeTransparency="1.0" cy:nodeLabelFont="SansSerif.bold-0-12" cy:nodeLabel="LOC100620470" cy:borderLineType="solid"/>
  </node>
  <node label="403330" id="-361">
    <att type="string" name="canonicalName" value="403330"/>
    <att type="list" name="cytoscape.alias.list">
      <att type="string" name="cytoscape.alias.list" value="403330"/>
    </att>
    <att type="string" name="geneName" value="CYP17A1"/>
    <att type="string" name="id" value="403330"/>
    <graphics type="ELLIPSE" h="40.0" w="40.0" x="1765.9825439453125" y="5025.67138671875" fill="#ccccff" width="1" outline="#666666" cy:nodeTransparency="1.0" cy:nodeLabelFont="SansSerif.bold-0-12" cy:nodeLabel="CYP17A1" cy:borderLineType="solid"/>
  </node>
  <node label="100152603" id="-360">
    <att type="string" name="canonicalName" value="100152603"/>
    <att type="list" name="cytoscape.alias.list">
      <att type="string" name="cytoscape.alias.list" value="100152603"/>
    </att>
    <att type="string" name="geneName" value="LOC100152603"/>
    <att type="string" name="id" value="100152603"/>
    <graphics type="ELLIPSE" h="40.0" w="40.0" x="1782.4237060546875" y="5248.90283203125" fill="#ccccff" width="1" outline="#666666" cy:nodeTransparency="1.0" cy:nodeLabelFont="SansSerif.bold-0-12" cy:nodeLabel="LOC100152603" cy:borderLineType="solid"/>
  </node>
  <node label="100155201" id="-359">
    <att type="string" name="canonicalName" value="100155201"/>
    <att type="list" name="cytoscape.alias.list">
      <att type="string" name="cytoscape.alias.list" value="100155201"/>
    </att>
    <att type="string" name="geneName" value="LOC100155201"/>
    <att type="string" name="id" value="100155201"/>
    <graphics type="ELLIPSE" h="40.0" w="40.0" x="760.129150390625" y="5167.67236328125" fill="#ccccff" width="1" outline="#666666" cy:nodeTransparency="1.0" cy:nodeLabelFont="SansSerif.bold-0-12" cy:nodeLabel="LOC100155201" cy:borderLineType="solid"/>
  </node>
  <node label="100154817" id="-358">
    <att type="string" name="canonicalName" value="100154817"/>
    <att type="list" name="cytoscape.alias.list">
      <att type="string" name="cytoscape.alias.list" value="100154817"/>
    </att>
    <att type="string" name="geneName" value="ATP5F1"/>
    <att type="string" name="id" value="100154817"/>
    <graphics type="ELLIPSE" h="40.0" w="40.0" x="815.5768432617188" y="5063.25341796875" fill="#ccccff" width="1" outline="#666666" cy:nodeTransparency="1.0" cy:nodeLabelFont="SansSerif.bold-0-12" cy:nodeLabel="ATP5F1" cy:borderLineType="solid"/>
  </node>
  <node label="100736975" id="-357">
    <att type="string" name="canonicalName" value="100736975"/>
    <att type="list" name="cytoscape.alias.list">
      <att type="string" name="cytoscape.alias.list" value="100736975"/>
    </att>
    <att type="string" name="geneName" value="LOC100736975"/>
    <att type="string" name="id" value="100736975"/>
    <graphics type="ELLIPSE" h="40.0" w="40.0" x="880.0015258789062" y="5142.3349609375" fill="#ccccff" width="1" outline="#666666" cy:nodeTransparency="1.0" cy:nodeLabelFont="SansSerif.bold-0-12" cy:nodeLabel="LOC100736975" cy:borderLineType="solid"/>
  </node>
  <node label="100156052" id="-356">
    <att type="string" name="canonicalName" value="100156052"/>
    <att type="list" name="cytoscape.alias.list">
      <att type="string" name="cytoscape.alias.list" value="100156052"/>
    </att>
    <att type="string" name="geneName" value="LHPP"/>
    <att type="string" name="id" value="100156052"/>
    <graphics type="ELLIPSE" h="40.0" w="40.0" x="672.3001708984375" y="4943.29736328125" fill="#ccccff" width="1" outline="#666666" cy:nodeTransparency="1.0" cy:nodeLabelFont="SansSerif.bold-0-12" cy:nodeLabel="LHPP" cy:borderLineType="solid"/>
  </node>
  <node label="445531" id="-355">
    <att type="string" name="canonicalName" value="445531"/>
    <att type="list" name="cytoscape.alias.list">
      <att type="string" name="cytoscape.alias.list" value="445531"/>
    </att>
    <att type="string" name="geneName" value="ATP6V1A"/>
    <att type="string" name="id" value="445531"/>
    <graphics type="ELLIPSE" h="40.0" w="40.0" x="707.259521484375" y="5053.22119140625" fill="#ccccff" width="1" outline="#666666" cy:nodeTransparency="1.0" cy:nodeLabelFont="SansSerif.bold-0-12" cy:nodeLabel="ATP6V1A" cy:borderLineType="solid"/>
  </node>
  <node label="100523998" id="-354">
    <att type="string" name="canonicalName" value="100523998"/>
    <att type="list" name="cytoscape.alias.list">
      <att type="string" name="cytoscape.alias.list" value="100523998"/>
    </att>
    <att type="string" name="geneName" value="ATP6V1B2"/>
    <att type="string" name="id" value="100523998"/>
    <graphics type="ELLIPSE" h="40.0" w="40.0" x="771.8944091796875" y="5283.7861328125" fill="#ccccff" width="1" outline="#666666" cy:nodeTransparency="1.0" cy:nodeLabelFont="SansSerif.bold-0-12" cy:nodeLabel="ATP6V1B2" cy:borderLineType="solid"/>
  </node>
  <node label="100739134" id="-353">
    <att type="string" name="canonicalName" value="100739134"/>
    <att type="list" name="cytoscape.alias.list">
      <att type="string" name="cytoscape.alias.list" value="100739134"/>
    </att>
    <att type="string" name="geneName" value="LOC100739134"/>
    <att type="string" name="id" value="100739134"/>
    <graphics type="ELLIPSE" h="40.0" w="40.0" x="861.4199829101562" y="5233.7470703125" fill="#ccccff" width="1" outline="#666666" cy:nodeTransparency="1.0" cy:nodeLabelFont="SansSerif.bold-0-12" cy:nodeLabel="LOC100739134" cy:borderLineType="solid"/>
  </node>
  <node label="100152988" id="-352">
    <att type="string" name="canonicalName" value="100152988"/>
    <att type="list" name="cytoscape.alias.list">
      <att type="string" name="cytoscape.alias.list" value="100152988"/>
    </att>
    <att type="string" name="geneName" value="LOC100152988"/>
    <att type="string" name="id" value="100152988"/>
    <graphics type="ELLIPSE" h="40.0" w="40.0" x="2641.510009765625" y="6040.91455078125" fill="#ccccff" width="1" outline="#666666" cy:nodeTransparency="1.0" cy:nodeLabelFont="SansSerif.bold-0-12" cy:nodeLabel="LOC100152988" cy:borderLineType="solid"/>
  </node>
  <node label="100519280" id="-351">
    <att type="string" name="canonicalName" value="100519280"/>
    <att type="list" name="cytoscape.alias.list">
      <att type="string" name="cytoscape.alias.list" value="100519280"/>
    </att>
    <att type="string" name="geneName" value="SPTLC3"/>
    <att type="string" name="id" value="100519280"/>
    <graphics type="ELLIPSE" h="40.0" w="40.0" x="2548.512451171875" y="6098.5361328125" fill="#ccccff" width="1" outline="#666666" cy:nodeTransparency="1.0" cy:nodeLabelFont="SansSerif.bold-0-12" cy:nodeLabel="SPTLC3" cy:borderLineType="solid"/>
  </node>
  <node label="100525450" id="-350">
    <att type="string" name="canonicalName" value="100525450"/>
    <att type="list" name="cytoscape.alias.list">
      <att type="string" name="cytoscape.alias.list" value="100525450"/>
    </att>
    <att type="string" name="geneName" value="LOC100525450"/>
    <att type="string" name="id" value="100525450"/>
    <graphics type="ELLIPSE" h="40.0" w="40.0" x="261.6759033203125" y="2115.710205078125" fill="#ccccff" width="1" outline="#666666" cy:nodeTransparency="1.0" cy:nodeLabelFont="SansSerif.bold-0-12" cy:nodeLabel="LOC100525450" cy:borderLineType="solid"/>
  </node>
  <node label="100519210" id="-349">
    <att type="string" name="canonicalName" value="100519210"/>
    <att type="list" name="cytoscape.alias.list">
      <att type="string" name="cytoscape.alias.list" value="100519210"/>
    </att>
    <att type="string" name="geneName" value="LOC100519210"/>
    <att type="string" name="id" value="100519210"/>
    <graphics type="ELLIPSE" h="40.0" w="40.0" x="418.3243408203125" y="2184.882080078125" fill="#ccccff" width="1" outline="#666666" cy:nodeTransparency="1.0" cy:nodeLabelFont="SansSerif.bold-0-12" cy:nodeLabel="LOC100519210" cy:borderLineType="solid"/>
  </node>
  <node label="100518796" id="-348">
    <att type="string" name="canonicalName" value="100518796"/>
    <att type="list" name="cytoscape.alias.list">
      <att type="string" name="cytoscape.alias.list" value="100518796"/>
    </att>
    <att type="string" name="geneName" value="SGMS2"/>
    <att type="string" name="id" value="100518796"/>
    <graphics type="ELLIPSE" h="40.0" w="40.0" x="174.07470703125" y="2073.7841796875" fill="#ccccff" width="1" outline="#666666" cy:nodeTransparency="1.0" cy:nodeLabelFont="SansSerif.bold-0-12" cy:nodeLabel="SGMS2" cy:borderLineType="solid"/>
  </node>
  <node label="100511825" id="-347">
    <att type="string" name="canonicalName" value="100511825"/>
    <att type="list" name="cytoscape.alias.list">
      <att type="string" name="cytoscape.alias.list" value="100511825"/>
    </att>
    <att type="string" name="geneName" value="LOC100511825"/>
    <att type="string" name="id" value="100511825"/>
    <graphics type="ELLIPSE" h="40.0" w="40.0" x="167.9727783203125" y="2187.73681640625" fill="#ccccff" width="1" outline="#666666" cy:nodeTransparency="1.0" cy:nodeLabelFont="SansSerif.bold-0-12" cy:nodeLabel="LOC100511825" cy:borderLineType="solid"/>
  </node>
  <node label="100152725" id="-346">
    <att type="string" name="canonicalName" value="100152725"/>
    <att type="list" name="cytoscape.alias.list">
      <att type="string" name="cytoscape.alias.list" value="100152725"/>
    </att>
    <att type="string" name="geneName" value="SMPD4"/>
    <att type="string" name="id" value="100152725"/>
    <graphics type="ELLIPSE" h="40.0" w="40.0" x="99.2716064453125" y="2282.551513671875" fill="#ccccff" width="1" outline="#666666" cy:nodeTransparency="1.0" cy:nodeLabelFont="SansSerif.bold-0-12" cy:nodeLabel="SMPD4" cy:borderLineType="solid"/>
  </node>
  <node label="100152265" id="-345">
    <att type="string" name="canonicalName" value="100152265"/>
    <att type="list" name="cytoscape.alias.list">
      <att type="string" name="cytoscape.alias.list" value="100152265"/>
    </att>
    <att type="string" name="geneName" value="LASS3"/>
    <att type="string" name="id" value="100152265"/>
    <graphics type="ELLIPSE" h="40.0" w="40.0" x="2339.7109375" y="5984.42724609375" fill="#ccccff" width="1" outline="#666666" cy:nodeTransparency="1.0" cy:nodeLabelFont="SansSerif.bold-0-12" cy:nodeLabel="LASS3" cy:borderLineType="solid"/>
  </node>
  <node label="100037303" id="-344">
    <att type="string" name="canonicalName" value="100037303"/>
    <att type="list" name="cytoscape.alias.list">
      <att type="string" name="cytoscape.alias.list" value="100037303"/>
    </att>
    <att type="string" name="geneName" value="SGMS1"/>
    <att type="string" name="id" value="100037303"/>
    <graphics type="ELLIPSE" h="40.0" w="40.0" x="2230.35986328125" y="5980.2080078125" fill="#ccccff" width="1" outline="#666666" cy:nodeTransparency="1.0" cy:nodeLabelFont="SansSerif.bold-0-12" cy:nodeLabel="SGMS1" cy:borderLineType="solid"/>
  </node>
  <node label="100525187" id="-343">
    <att type="string" name="canonicalName" value="100525187"/>
    <att type="list" name="cytoscape.alias.list">
      <att type="string" name="cytoscape.alias.list" value="100525187"/>
    </att>
    <att type="string" name="geneName" value="SGPL1"/>
    <att type="string" name="id" value="100525187"/>
    <graphics type="ELLIPSE" h="40.0" w="40.0" x="751.9404296875" y="2327.578125" fill="#ccccff" width="1" outline="#666666" cy:nodeTransparency="1.0" cy:nodeLabelFont="SansSerif.bold-0-12" cy:nodeLabel="SGPL1" cy:borderLineType="solid"/>
  </node>
  <node label="100524832" id="-342">
    <att type="string" name="canonicalName" value="100524832"/>
    <att type="list" name="cytoscape.alias.list">
      <att type="string" name="cytoscape.alias.list" value="100524832"/>
    </att>
    <att type="string" name="geneName" value="LOC100524832"/>
    <att type="string" name="id" value="100524832"/>
    <graphics type="ELLIPSE" h="40.0" w="40.0" x="579.6822509765625" y="2255.15234375" fill="#ccccff" width="1" outline="#666666" cy:nodeTransparency="1.0" cy:nodeLabelFont="SansSerif.bold-0-12" cy:nodeLabel="LOC100524832" cy:borderLineType="solid"/>
  </node>
  <node label="100155321" id="-341">
    <att type="string" name="canonicalName" value="100155321"/>
    <att type="list" name="cytoscape.alias.list">
      <att type="string" name="cytoscape.alias.list" value="100155321"/>
    </att>
    <att type="string" name="geneName" value="LOC100155321"/>
    <att type="string" name="id" value="100155321"/>
    <graphics type="ELLIPSE" h="40.0" w="40.0" x="0.0" y="2051.581298828125" fill="#ccccff" width="1" outline="#666666" cy:nodeTransparency="1.0" cy:nodeLabelFont="SansSerif.bold-0-12" cy:nodeLabel="LOC100155321" cy:borderLineType="solid"/>
  </node>
  <node label="100156917" id="-340">
    <att type="string" name="canonicalName" value="100156917"/>
    <att type="list" name="cytoscape.alias.list">
      <att type="string" name="cytoscape.alias.list" value="100156917"/>
    </att>
    <att type="string" name="geneName" value="GALC"/>
    <att type="string" name="id" value="100156917"/>
    <graphics type="ELLIPSE" h="40.0" w="40.0" x="118.5865478515625" y="2018.36767578125" fill="#ccccff" width="1" outline="#666666" cy:nodeTransparency="1.0" cy:nodeLabelFont="SansSerif.bold-0-12" cy:nodeLabel="GALC" cy:borderLineType="solid"/>
  </node>
  <node label="449572" id="-339">
    <att type="string" name="canonicalName" value="449572"/>
    <att type="list" name="cytoscape.alias.list">
      <att type="string" name="cytoscape.alias.list" value="449572"/>
    </att>
    <att type="string" name="geneName" value="GBA"/>
    <att type="string" name="id" value="449572"/>
    <graphics type="ELLIPSE" h="40.0" w="40.0" x="198.2034912109375" y="1956.967529296875" fill="#ccccff" width="1" outline="#666666" cy:nodeTransparency="1.0" cy:nodeLabelFont="SansSerif.bold-0-12" cy:nodeLabel="GBA" cy:borderLineType="solid"/>
  </node>
  <node label="100518980" id="-338">
    <att type="string" name="canonicalName" value="100518980"/>
    <att type="list" name="cytoscape.alias.list">
      <att type="string" name="cytoscape.alias.list" value="100518980"/>
    </att>
    <att type="string" name="geneName" value="SMPD1"/>
    <att type="string" name="id" value="100518980"/>
    <graphics type="ELLIPSE" h="40.0" w="40.0" x="14.94677734375" y="1948.6939697265625" fill="#ccccff" width="1" outline="#666666" cy:nodeTransparency="1.0" cy:nodeLabelFont="SansSerif.bold-0-12" cy:nodeLabel="SMPD1" cy:borderLineType="solid"/>
  </node>
  <node label="100126279" id="-337">
    <att type="string" name="canonicalName" value="100126279"/>
    <att type="list" name="cytoscape.alias.list">
      <att type="string" name="cytoscape.alias.list" value="100126279"/>
    </att>
    <att type="string" name="geneName" value="LASS6"/>
    <att type="string" name="id" value="100126279"/>
    <graphics type="ELLIPSE" h="40.0" w="40.0" x="2732.5400390625" y="5980.2080078125" fill="#ccccff" width="1" outline="#666666" cy:nodeTransparency="1.0" cy:nodeLabelFont="SansSerif.bold-0-12" cy:nodeLabel="LASS6" cy:borderLineType="solid"/>
  </node>
  <node label="100135677" id="-336">
    <att type="string" name="canonicalName" value="100135677"/>
    <att type="list" name="cytoscape.alias.list">
      <att type="string" name="cytoscape.alias.list" value="100135677"/>
    </att>
    <att type="string" name="geneName" value="DEGS1"/>
    <att type="string" name="id" value="100135677"/>
    <graphics type="ELLIPSE" h="40.0" w="40.0" x="73.47705078125" y="1778.935546875" fill="#ccccff" width="1" outline="#666666" cy:nodeTransparency="1.0" cy:nodeLabelFont="SansSerif.bold-0-12" cy:nodeLabel="DEGS1" cy:borderLineType="solid"/>
  </node>
  <node label="100518128" id="-335">
    <att type="string" name="canonicalName" value="100518128"/>
    <att type="list" name="cytoscape.alias.list">
      <att type="string" name="cytoscape.alias.list" value="100518128"/>
    </att>
    <att type="string" name="geneName" value="LOC100518128"/>
    <att type="string" name="id" value="100518128"/>
    <graphics type="ELLIPSE" h="40.0" w="40.0" x="110.8662109375" y="1890.947509765625" fill="#ccccff" width="1" outline="#666666" cy:nodeTransparency="1.0" cy:nodeLabelFont="SansSerif.bold-0-12" cy:nodeLabel="LOC100518128" cy:borderLineType="solid"/>
  </node>
  <node label="100626032" id="-334">
    <att type="string" name="canonicalName" value="100626032"/>
    <att type="list" name="cytoscape.alias.list">
      <att type="string" name="cytoscape.alias.list" value="100626032"/>
    </att>
    <att type="string" name="geneName" value="SGPP1"/>
    <att type="string" name="id" value="100626032"/>
    <graphics type="ELLIPSE" h="40.0" w="40.0" x="2448.512451171875" y="5995.94580078125" fill="#ccccff" width="1" outline="#666666" cy:nodeTransparency="1.0" cy:nodeLabelFont="SansSerif.bold-0-12" cy:nodeLabel="SGPP1" cy:borderLineType="solid"/>
  </node>
  <node label="100512419" id="-333">
    <att type="string" name="canonicalName" value="100512419"/>
    <att type="list" name="cytoscape.alias.list">
      <att type="string" name="cytoscape.alias.list" value="100512419"/>
    </att>
    <att type="string" name="geneName" value="LOC100512419"/>
    <att type="string" name="id" value="100512419"/>
    <graphics type="ELLIPSE" h="40.0" w="40.0" x="1026.0731201171875" y="6573.18896484375" fill="#ccccff" width="1" outline="#666666" cy:nodeTransparency="1.0" cy:nodeLabelFont="SansSerif.bold-0-12" cy:nodeLabel="LOC100512419" cy:borderLineType="solid"/>
  </node>
  <node label="100622165" id="-332">
    <att type="string" name="canonicalName" value="100622165"/>
    <att type="list" name="cytoscape.alias.list">
      <att type="string" name="cytoscape.alias.list" value="100622165"/>
    </att>
    <att type="string" name="geneName" value="LOC100622165"/>
    <att type="string" name="id" value="100622165"/>
    <graphics type="ELLIPSE" h="40.0" w="40.0" x="1024.24609375" y="6680.9375" fill="#ccccff" width="1" outline="#666666" cy:nodeTransparency="1.0" cy:nodeLabelFont="SansSerif.bold-0-12" cy:nodeLabel="LOC100622165" cy:borderLineType="solid"/>
  </node>
  <node label="553100" id="-331">
    <att type="string" name="canonicalName" value="553100"/>
    <att type="list" name="cytoscape.alias.list">
      <att type="string" name="cytoscape.alias.list" value="553100"/>
    </att>
    <att type="string" name="geneName" value="GUCY1A3"/>
    <att type="string" name="id" value="553100"/>
    <graphics type="ELLIPSE" h="40.0" w="40.0" x="2412.364501953125" y="1247.155517578125" fill="#ccccff" width="1" outline="#666666" cy:nodeTransparency="1.0" cy:nodeLabelFont="SansSerif.bold-0-12" cy:nodeLabel="GUCY1A3" cy:borderLineType="solid"/>
  </node>
  <node label="100158154" id="-330">
    <att type="string" name="canonicalName" value="100158154"/>
    <att type="list" name="cytoscape.alias.list">
      <att type="string" name="cytoscape.alias.list" value="100158154"/>
    </att>
    <att type="string" name="geneName" value="PKM"/>
    <att type="string" name="id" value="100158154"/>
    <graphics type="ELLIPSE" h="40.0" w="40.0" x="2352.048828125" y="1366.816650390625" fill="#ccccff" width="1" outline="#666666" cy:nodeTransparency="1.0" cy:nodeLabelFont="SansSerif.bold-0-12" cy:nodeLabel="PKM" cy:borderLineType="solid"/>
  </node>
  <node label="397193" id="-329">
    <att type="string" name="canonicalName" value="397193"/>
    <att type="list" name="cytoscape.alias.list">
      <att type="string" name="cytoscape.alias.list" value="397193"/>
    </att>
    <att type="string" name="geneName" value="GUCY2C"/>
    <att type="string" name="id" value="397193"/>
    <graphics type="ELLIPSE" h="40.0" w="40.0" x="1971.133056640625" y="1534.7919921875" fill="#ccccff" width="1" outline="#666666" cy:nodeTransparency="1.0" cy:nodeLabelFont="SansSerif.bold-0-12" cy:nodeLabel="GUCY2C" cy:borderLineType="solid"/>
  </node>
  <node label="100153508" id="-328">
    <att type="string" name="canonicalName" value="100153508"/>
    <att type="list" name="cytoscape.alias.list">
      <att type="string" name="cytoscape.alias.list" value="100153508"/>
    </att>
    <att type="string" name="geneName" value="NPR1"/>
    <att type="string" name="id" value="100153508"/>
    <graphics type="ELLIPSE" h="40.0" w="40.0" x="2178.6328125" y="1706.2896728515625" fill="#ccccff" width="1" outline="#666666" cy:nodeTransparency="1.0" cy:nodeLabelFont="SansSerif.bold-0-12" cy:nodeLabel="NPR1" cy:borderLineType="solid"/>
  </node>
  <node label="100737040" id="-327">
    <att type="string" name="canonicalName" value="100737040"/>
    <att type="list" name="cytoscape.alias.list">
      <att type="string" name="cytoscape.alias.list" value="100737040"/>
    </att>
    <att type="string" name="geneName" value="POLR2A"/>
    <att type="string" name="id" value="100737040"/>
    <graphics type="ELLIPSE" h="40.0" w="40.0" x="2366.195068359375" y="1752.0535888671875" fill="#ccccff" width="1" outline="#666666" cy:nodeTransparency="1.0" cy:nodeLabelFont="SansSerif.bold-0-12" cy:nodeLabel="POLR2A" cy:borderLineType="solid"/>
  </node>
  <node label="100620737" id="-326">
    <att type="string" name="canonicalName" value="100620737"/>
    <att type="list" name="cytoscape.alias.list">
      <att type="string" name="cytoscape.alias.list" value="100620737"/>
    </att>
    <att type="string" name="geneName" value="LOC100620737"/>
    <att type="string" name="id" value="100620737"/>
    <graphics type="ELLIPSE" h="40.0" w="40.0" x="2280.938720703125" y="1549.9931640625" fill="#ccccff" width="1" outline="#666666" cy:nodeTransparency="1.0" cy:nodeLabelFont="SansSerif.bold-0-12" cy:nodeLabel="LOC100620737" cy:borderLineType="solid"/>
  </node>
  <node label="100522091" id="-325">
    <att type="string" name="canonicalName" value="100522091"/>
    <att type="list" name="cytoscape.alias.list">
      <att type="string" name="cytoscape.alias.list" value="100522091"/>
    </att>
    <att type="string" name="geneName" value="GUCY1A2"/>
    <att type="string" name="id" value="100522091"/>
    <graphics type="ELLIPSE" h="40.0" w="40.0" x="2498.1884765625" y="1010.0120849609375" fill="#ccccff" width="1" outline="#666666" cy:nodeTransparency="1.0" cy:nodeLabelFont="SansSerif.bold-0-12" cy:nodeLabel="GUCY1A2" cy:borderLineType="solid"/>
  </node>
  <node label="100156445" id="-324">
    <att type="string" name="canonicalName" value="100156445"/>
    <att type="list" name="cytoscape.alias.list">
      <att type="string" name="cytoscape.alias.list" value="100156445"/>
    </att>
    <att type="string" name="geneName" value="POLR1E"/>
    <att type="string" name="id" value="100156445"/>
    <graphics type="ELLIPSE" h="40.0" w="40.0" x="1894.3665771484375" y="1987.6851806640625" fill="#ccccff" width="1" outline="#666666" cy:nodeTransparency="1.0" cy:nodeLabelFont="SansSerif.bold-0-12" cy:nodeLabel="POLR1E" cy:borderLineType="solid"/>
  </node>
  <node label="100037971" id="-323">
    <att type="string" name="canonicalName" value="100037971"/>
    <att type="list" name="cytoscape.alias.list">
      <att type="string" name="cytoscape.alias.list" value="100037971"/>
    </att>
    <att type="string" name="geneName" value="LOC100037971"/>
    <att type="string" name="id" value="100037971"/>
    <graphics type="ELLIPSE" h="40.0" w="40.0" x="1961.8369140625" y="1735.487060546875" fill="#ccccff" width="1" outline="#666666" cy:nodeTransparency="1.0" cy:nodeLabelFont="SansSerif.bold-0-12" cy:nodeLabel="LOC100037971" cy:borderLineType="solid"/>
  </node>
  <node label="100512698" id="-322">
    <att type="string" name="canonicalName" value="100512698"/>
    <att type="list" name="cytoscape.alias.list">
      <att type="string" name="cytoscape.alias.list" value="100512698"/>
    </att>
    <att type="string" name="geneName" value="NPR2"/>
    <att type="string" name="id" value="100512698"/>
    <graphics type="ELLIPSE" h="40.0" w="40.0" x="2236.85400390625" y="1528.0145263671875" fill="#ccccff" width="1" outline="#666666" cy:nodeTransparency="1.0" cy:nodeLabelFont="SansSerif.bold-0-12" cy:nodeLabel="NPR2" cy:borderLineType="solid"/>
  </node>
  <node label="100515715" id="-321">
    <att type="string" name="canonicalName" value="100515715"/>
    <att type="list" name="cytoscape.alias.list">
      <att type="string" name="cytoscape.alias.list" value="100515715"/>
    </att>
    <att type="string" name="geneName" value="LOC100515715"/>
    <att type="string" name="id" value="100515715"/>
    <graphics type="ELLIPSE" h="40.0" w="40.0" x="2065.59521484375" y="1605.954833984375" fill="#ccccff" width="1" outline="#666666" cy:nodeTransparency="1.0" cy:nodeLabelFont="SansSerif.bold-0-12" cy:nodeLabel="LOC100515715" cy:borderLineType="solid"/>
  </node>
  <node label="100522306" id="-320">
    <att type="string" name="canonicalName" value="100522306"/>
    <att type="list" name="cytoscape.alias.list">
      <att type="string" name="cytoscape.alias.list" value="100522306"/>
    </att>
    <att type="string" name="geneName" value="PDE8B"/>
    <att type="string" name="id" value="100522306"/>
    <graphics type="ELLIPSE" h="40.0" w="40.0" x="2020.7330322265625" y="1602.632080078125" fill="#ccccff" width="1" outline="#666666" cy:nodeTransparency="1.0" cy:nodeLabelFont="SansSerif.bold-0-12" cy:nodeLabel="PDE8B" cy:borderLineType="solid"/>
  </node>
  <node label="100525485" id="-319">
    <att type="string" name="canonicalName" value="100525485"/>
    <att type="list" name="cytoscape.alias.list">
      <att type="string" name="cytoscape.alias.list" value="100525485"/>
    </att>
    <att type="string" name="geneName" value="LOC100525485"/>
    <att type="string" name="id" value="100525485"/>
    <graphics type="ELLIPSE" h="40.0" w="40.0" x="1617.7335205078125" y="1435.1209716796875" fill="#ccccff" width="1" outline="#666666" cy:nodeTransparency="1.0" cy:nodeLabelFont="SansSerif.bold-0-12" cy:nodeLabel="LOC100525485" cy:borderLineType="solid"/>
  </node>
  <node label="100512255" id="-318">
    <att type="string" name="canonicalName" value="100512255"/>
    <att type="list" name="cytoscape.alias.list">
      <att type="string" name="cytoscape.alias.list" value="100512255"/>
    </att>
    <att type="string" name="geneName" value="GMPS"/>
    <att type="string" name="id" value="100512255"/>
    <graphics type="ELLIPSE" h="40.0" w="40.0" x="1723.073486328125" y="1501.241943359375" fill="#ccccff" width="1" outline="#666666" cy:nodeTransparency="1.0" cy:nodeLabelFont="SansSerif.bold-0-12" cy:nodeLabel="GMPS" cy:borderLineType="solid"/>
  </node>
  <node label="100521423" id="-317">
    <att type="string" name="canonicalName" value="100521423"/>
    <att type="list" name="cytoscape.alias.list">
      <att type="string" name="cytoscape.alias.list" value="100521423"/>
    </att>
    <att type="string" name="geneName" value="LOC100521423"/>
    <att type="string" name="id" value="100521423"/>
    <graphics type="ELLIPSE" h="40.0" w="40.0" x="1864.4759521484375" y="1585.3236083984375" fill="#ccccff" width="1" outline="#666666" cy:nodeTransparency="1.0" cy:nodeLabelFont="SansSerif.bold-0-12" cy:nodeLabel="LOC100521423" cy:borderLineType="solid"/>
  </node>
  <node label="100521662" id="-316">
    <att type="string" name="canonicalName" value="100521662"/>
    <att type="list" name="cytoscape.alias.list">
      <att type="string" name="cytoscape.alias.list" value="100521662"/>
    </att>
    <att type="string" name="geneName" value="LOC100521662"/>
    <att type="string" name="id" value="100521662"/>
    <graphics type="ELLIPSE" h="40.0" w="40.0" x="1720.7880859375" y="1589.929443359375" fill="#ccccff" width="1" outline="#666666" cy:nodeTransparency="1.0" cy:nodeLabelFont="SansSerif.bold-0-12" cy:nodeLabel="LOC100521662" cy:borderLineType="solid"/>
  </node>
  <node label="396825" id="-315">
    <att type="string" name="canonicalName" value="396825"/>
    <att type="list" name="cytoscape.alias.list">
      <att type="string" name="cytoscape.alias.list" value="396825"/>
    </att>
    <att type="string" name="geneName" value="PDE4A"/>
    <att type="string" name="id" value="396825"/>
    <graphics type="ELLIPSE" h="40.0" w="40.0" x="2027.2869873046875" y="1643.6329345703125" fill="#ccccff" width="1" outline="#666666" cy:nodeTransparency="1.0" cy:nodeLabelFont="SansSerif.bold-0-12" cy:nodeLabel="PDE4A" cy:borderLineType="solid"/>
  </node>
  <node label="100154626" id="-314">
    <att type="string" name="canonicalName" value="100154626"/>
    <att type="list" name="cytoscape.alias.list">
      <att type="string" name="cytoscape.alias.list" value="100154626"/>
    </att>
    <att type="string" name="geneName" value="ADK"/>
    <att type="string" name="id" value="100154626"/>
    <graphics type="ELLIPSE" h="40.0" w="40.0" x="1761.9097900390625" y="1512.2830810546875" fill="#ccccff" width="1" outline="#666666" cy:nodeTransparency="1.0" cy:nodeLabelFont="SansSerif.bold-0-12" cy:nodeLabel="ADK" cy:borderLineType="solid"/>
  </node>
  <node label="100516060" id="-313">
    <att type="string" name="canonicalName" value="100516060"/>
    <att type="list" name="cytoscape.alias.list">
      <att type="string" name="cytoscape.alias.list" value="100516060"/>
    </att>
    <att type="string" name="geneName" value="PDE3B"/>
    <att type="string" name="id" value="100516060"/>
    <graphics type="ELLIPSE" h="40.0" w="40.0" x="1804.969482421875" y="1492.51708984375" fill="#ccccff" width="1" outline="#666666" cy:nodeTransparency="1.0" cy:nodeLabelFont="SansSerif.bold-0-12" cy:nodeLabel="PDE3B" cy:borderLineType="solid"/>
  </node>
  <node label="100514527" id="-312">
    <att type="string" name="canonicalName" value="100514527"/>
    <att type="list" name="cytoscape.alias.list">
      <att type="string" name="cytoscape.alias.list" value="100514527"/>
    </att>
    <att type="string" name="geneName" value="PDE8A"/>
    <att type="string" name="id" value="100514527"/>
    <graphics type="ELLIPSE" h="40.0" w="40.0" x="1830.4228515625" y="1689.096923828125" fill="#ccccff" width="1" outline="#666666" cy:nodeTransparency="1.0" cy:nodeLabelFont="SansSerif.bold-0-12" cy:nodeLabel="PDE8A" cy:borderLineType="solid"/>
  </node>
  <node label="733667" id="-311">
    <att type="string" name="canonicalName" value="733667"/>
    <att type="list" name="cytoscape.alias.list">
      <att type="string" name="cytoscape.alias.list" value="733667"/>
    </att>
    <att type="string" name="geneName" value="AK3L1"/>
    <att type="string" name="id" value="733667"/>
    <graphics type="ELLIPSE" h="40.0" w="40.0" x="1889.66845703125" y="1519.8634033203125" fill="#ccccff" width="1" outline="#666666" cy:nodeTransparency="1.0" cy:nodeLabelFont="SansSerif.bold-0-12" cy:nodeLabel="AK3L1" cy:borderLineType="solid"/>
  </node>
  <node label="100152573" id="-310">
    <att type="string" name="canonicalName" value="100152573"/>
    <att type="list" name="cytoscape.alias.list">
      <att type="string" name="cytoscape.alias.list" value="100152573"/>
    </att>
    <att type="string" name="geneName" value="AK7"/>
    <att type="string" name="id" value="100152573"/>
    <graphics type="ELLIPSE" h="40.0" w="40.0" x="1932.6793212890625" y="1442.6439208984375" fill="#ccccff" width="1" outline="#666666" cy:nodeTransparency="1.0" cy:nodeLabelFont="SansSerif.bold-0-12" cy:nodeLabel="AK7" cy:borderLineType="solid"/>
  </node>
  <node label="100154068" id="-309">
    <att type="string" name="canonicalName" value="100154068"/>
    <att type="list" name="cytoscape.alias.list">
      <att type="string" name="cytoscape.alias.list" value="100154068"/>
    </att>
    <att type="string" name="geneName" value="LOC100154068"/>
    <att type="string" name="id" value="100154068"/>
    <graphics type="ELLIPSE" h="40.0" w="40.0" x="1913.0745849609375" y="1551.8447265625" fill="#ccccff" width="1" outline="#666666" cy:nodeTransparency="1.0" cy:nodeLabelFont="SansSerif.bold-0-12" cy:nodeLabel="LOC100154068" cy:borderLineType="solid"/>
  </node>
  <node label="397616" id="-308">
    <att type="string" name="canonicalName" value="397616"/>
    <att type="list" name="cytoscape.alias.list">
      <att type="string" name="cytoscape.alias.list" value="397616"/>
    </att>
    <att type="string" name="geneName" value="PDE5"/>
    <att type="string" name="id" value="397616"/>
    <graphics type="ELLIPSE" h="40.0" w="40.0" x="1859.5718994140625" y="1475.79345703125" fill="#ccccff" width="1" outline="#666666" cy:nodeTransparency="1.0" cy:nodeLabelFont="SansSerif.bold-0-12" cy:nodeLabel="PDE5" cy:borderLineType="solid"/>
  </node>
  <node label="100037969" id="-307">
    <att type="string" name="canonicalName" value="100037969"/>
    <att type="list" name="cytoscape.alias.list">
      <att type="string" name="cytoscape.alias.list" value="100037969"/>
    </att>
    <att type="string" name="geneName" value="LOC100037969"/>
    <att type="string" name="id" value="100037969"/>
    <graphics type="ELLIPSE" h="40.0" w="40.0" x="1818.656982421875" y="1607.794677734375" fill="#ccccff" width="1" outline="#666666" cy:nodeTransparency="1.0" cy:nodeLabelFont="SansSerif.bold-0-12" cy:nodeLabel="LOC100037969" cy:borderLineType="solid"/>
  </node>
  <node label="100154378" id="-306">
    <att type="string" name="canonicalName" value="100154378"/>
    <att type="list" name="cytoscape.alias.list">
      <att type="string" name="cytoscape.alias.list" value="100154378"/>
    </att>
    <att type="string" name="geneName" value="PDE10A"/>
    <att type="string" name="id" value="100154378"/>
    <graphics type="ELLIPSE" h="40.0" w="40.0" x="1779.0908203125" y="1417.598388671875" fill="#ccccff" width="1" outline="#666666" cy:nodeTransparency="1.0" cy:nodeLabelFont="SansSerif.bold-0-12" cy:nodeLabel="PDE10A" cy:borderLineType="solid"/>
  </node>
  <node label="100154573" id="-305">
    <att type="string" name="canonicalName" value="100154573"/>
    <att type="list" name="cytoscape.alias.list">
      <att type="string" name="cytoscape.alias.list" value="100154573"/>
    </att>
    <att type="string" name="geneName" value="GMPR"/>
    <att type="string" name="id" value="100154573"/>
    <graphics type="ELLIPSE" h="40.0" w="40.0" x="1862.7734375" y="1633.7706298828125" fill="#ccccff" width="1" outline="#666666" cy:nodeTransparency="1.0" cy:nodeLabelFont="SansSerif.bold-0-12" cy:nodeLabel="GMPR" cy:borderLineType="solid"/>
  </node>
  <node label="100037941" id="-304">
    <att type="string" name="canonicalName" value="100037941"/>
    <att type="list" name="cytoscape.alias.list">
      <att type="string" name="cytoscape.alias.list" value="100037941"/>
    </att>
    <att type="string" name="geneName" value="PDE4B"/>
    <att type="string" name="id" value="100037941"/>
    <graphics type="ELLIPSE" h="40.0" w="40.0" x="1629.7901611328125" y="1609.421630859375" fill="#ccccff" width="1" outline="#666666" cy:nodeTransparency="1.0" cy:nodeLabelFont="SansSerif.bold-0-12" cy:nodeLabel="PDE4B" cy:borderLineType="solid"/>
  </node>
  <node label="100525046" id="-303">
    <att type="string" name="canonicalName" value="100525046"/>
    <att type="list" name="cytoscape.alias.list">
      <att type="string" name="cytoscape.alias.list" value="100525046"/>
    </att>
    <att type="string" name="geneName" value="LOC100525046"/>
    <att type="string" name="id" value="100525046"/>
    <graphics type="ELLIPSE" h="40.0" w="40.0" x="1889.0316162109375" y="1346.248779296875" fill="#ccccff" width="1" outline="#666666" cy:nodeTransparency="1.0" cy:nodeLabelFont="SansSerif.bold-0-12" cy:nodeLabel="LOC100525046" cy:borderLineType="solid"/>
  </node>
  <node label="100627477" id="-302">
    <att type="string" name="canonicalName" value="100627477"/>
    <att type="list" name="cytoscape.alias.list">
      <att type="string" name="cytoscape.alias.list" value="100627477"/>
    </att>
    <att type="string" name="geneName" value="LOC100627477"/>
    <att type="string" name="id" value="100627477"/>
    <graphics type="ELLIPSE" h="40.0" w="40.0" x="2395.766845703125" y="1460.95654296875" fill="#ccccff" width="1" outline="#666666" cy:nodeTransparency="1.0" cy:nodeLabelFont="SansSerif.bold-0-12" cy:nodeLabel="LOC100627477" cy:borderLineType="solid"/>
  </node>
  <node label="100517503" id="-301">
    <att type="string" name="canonicalName" value="100517503"/>
    <att type="list" name="cytoscape.alias.list">
      <att type="string" name="cytoscape.alias.list" value="100517503"/>
    </att>
    <att type="string" name="geneName" value="ADCY2"/>
    <att type="string" name="id" value="100517503"/>
    <graphics type="ELLIPSE" h="40.0" w="40.0" x="2202.05615234375" y="1477.414306640625" fill="#ccccff" width="1" outline="#666666" cy:nodeTransparency="1.0" cy:nodeLabelFont="SansSerif.bold-0-12" cy:nodeLabel="ADCY2" cy:borderLineType="solid"/>
  </node>
  <node label="100152819" id="-300">
    <att type="string" name="canonicalName" value="100152819"/>
    <att type="list" name="cytoscape.alias.list">
      <att type="string" name="cytoscape.alias.list" value="100152819"/>
    </att>
    <att type="string" name="geneName" value="LOC100152819"/>
    <att type="string" name="id" value="100152819"/>
    <graphics type="ELLIPSE" h="40.0" w="40.0" x="1941.106201171875" y="1652.884521484375" fill="#ccccff" width="1" outline="#666666" cy:nodeTransparency="1.0" cy:nodeLabelFont="SansSerif.bold-0-12" cy:nodeLabel="LOC100152819" cy:borderLineType="solid"/>
  </node>
  <node label="100522261" id="-299">
    <att type="string" name="canonicalName" value="100522261"/>
    <att type="list" name="cytoscape.alias.list">
      <att type="string" name="cytoscape.alias.list" value="100522261"/>
    </att>
    <att type="string" name="geneName" value="PGM2"/>
    <att type="string" name="id" value="100522261"/>
    <graphics type="ELLIPSE" h="40.0" w="40.0" x="1514.043701171875" y="6029.609375" fill="#ccccff" width="1" outline="#666666" cy:nodeTransparency="1.0" cy:nodeLabelFont="SansSerif.bold-0-12" cy:nodeLabel="PGM2" cy:borderLineType="solid"/>
  </node>
  <node label="100521385" id="-298">
    <att type="string" name="canonicalName" value="100521385"/>
    <att type="list" name="cytoscape.alias.list">
      <att type="string" name="cytoscape.alias.list" value="100521385"/>
    </att>
    <att type="string" name="geneName" value="NUDT9"/>
    <att type="string" name="id" value="100521385"/>
    <graphics type="ELLIPSE" h="40.0" w="40.0" x="1417.2940673828125" y="6080.66552734375" fill="#ccccff" width="1" outline="#666666" cy:nodeTransparency="1.0" cy:nodeLabelFont="SansSerif.bold-0-12" cy:nodeLabel="NUDT9" cy:borderLineType="solid"/>
  </node>
  <node label="100622001" id="-297">
    <att type="string" name="canonicalName" value="100622001"/>
    <att type="list" name="cytoscape.alias.list">
      <att type="string" name="cytoscape.alias.list" value="100622001"/>
    </att>
    <att type="string" name="geneName" value="LOC100622001"/>
    <att type="string" name="id" value="100622001"/>
    <graphics type="ELLIPSE" h="40.0" w="40.0" x="1897.1331787109375" y="1394.2099609375" fill="#ccccff" width="1" outline="#666666" cy:nodeTransparency="1.0" cy:nodeLabelFont="SansSerif.bold-0-12" cy:nodeLabel="LOC100622001" cy:borderLineType="solid"/>
  </node>
  <node label="100157188" id="-296">
    <att type="string" name="canonicalName" value="100157188"/>
    <att type="list" name="cytoscape.alias.list">
      <att type="string" name="cytoscape.alias.list" value="100157188"/>
    </att>
    <att type="string" name="geneName" value="ADCY10"/>
    <att type="string" name="id" value="100157188"/>
    <graphics type="ELLIPSE" h="40.0" w="40.0" x="1916.10009765625" y="1702.76513671875" fill="#ccccff" width="1" outline="#666666" cy:nodeTransparency="1.0" cy:nodeLabelFont="SansSerif.bold-0-12" cy:nodeLabel="ADCY10" cy:borderLineType="solid"/>
  </node>
  <node label="100127143" id="-295">
    <att type="string" name="canonicalName" value="100127143"/>
    <att type="list" name="cytoscape.alias.list">
      <att type="string" name="cytoscape.alias.list" value="100127143"/>
    </att>
    <att type="string" name="geneName" value="LOC100127143"/>
    <att type="string" name="id" value="100127143"/>
    <graphics type="ELLIPSE" h="40.0" w="40.0" x="1772.7152099609375" y="1663.496826171875" fill="#ccccff" width="1" outline="#666666" cy:nodeTransparency="1.0" cy:nodeLabelFont="SansSerif.bold-0-12" cy:nodeLabel="LOC100127143" cy:borderLineType="solid"/>
  </node>
  <node label="100517354" id="-294">
    <att type="string" name="canonicalName" value="100517354"/>
    <att type="list" name="cytoscape.alias.list">
      <att type="string" name="cytoscape.alias.list" value="100517354"/>
    </att>
    <att type="string" name="geneName" value="LOC100517354"/>
    <att type="string" name="id" value="100517354"/>
    <graphics type="ELLIPSE" h="40.0" w="40.0" x="1756.116455078125" y="1792.2147216796875" fill="#ccccff" width="1" outline="#666666" cy:nodeTransparency="1.0" cy:nodeLabelFont="SansSerif.bold-0-12" cy:nodeLabel="LOC100517354" cy:borderLineType="solid"/>
  </node>
  <node label="733697" id="-293">
    <att type="string" name="canonicalName" value="733697"/>
    <att type="list" name="cytoscape.alias.list">
      <att type="string" name="cytoscape.alias.list" value="733697"/>
    </att>
    <att type="string" name="geneName" value="AK5"/>
    <att type="string" name="id" value="733697"/>
    <graphics type="ELLIPSE" h="40.0" w="40.0" x="1666.1815185546875" y="1487.55322265625" fill="#ccccff" width="1" outline="#666666" cy:nodeTransparency="1.0" cy:nodeLabelFont="SansSerif.bold-0-12" cy:nodeLabel="AK5" cy:borderLineType="solid"/>
  </node>
  <node label="100625536" id="-292">
    <att type="string" name="canonicalName" value="100625536"/>
    <att type="list" name="cytoscape.alias.list">
      <att type="string" name="cytoscape.alias.list" value="100625536"/>
    </att>
    <att type="string" name="geneName" value="LOC100625536"/>
    <att type="string" name="id" value="100625536"/>
    <graphics type="ELLIPSE" h="40.0" w="40.0" x="2263.365966796875" y="1392.7576904296875" fill="#ccccff" width="1" outline="#666666" cy:nodeTransparency="1.0" cy:nodeLabelFont="SansSerif.bold-0-12" cy:nodeLabel="LOC100625536" cy:borderLineType="solid"/>
  </node>
  <node label="444999" id="-291">
    <att type="string" name="canonicalName" value="444999"/>
    <att type="list" name="cytoscape.alias.list">
      <att type="string" name="cytoscape.alias.list" value="444999"/>
    </att>
    <att type="string" name="geneName" value="GUCY1B3"/>
    <att type="string" name="id" value="444999"/>
    <graphics type="ELLIPSE" h="40.0" w="40.0" x="2506.45947265625" y="1694.8662109375" fill="#ccccff" width="1" outline="#666666" cy:nodeTransparency="1.0" cy:nodeLabelFont="SansSerif.bold-0-12" cy:nodeLabel="GUCY1B3" cy:borderLineType="solid"/>
  </node>
  <node label="100521614" id="-290">
    <att type="string" name="canonicalName" value="100521614"/>
    <att type="list" name="cytoscape.alias.list">
      <att type="string" name="cytoscape.alias.list" value="100521614"/>
    </att>
    <att type="string" name="geneName" value="LOC100521614"/>
    <att type="string" name="id" value="100521614"/>
    <graphics type="ELLIPSE" h="40.0" w="40.0" x="2323.283203125" y="1640.4542236328125" fill="#ccccff" width="1" outline="#666666" cy:nodeTransparency="1.0" cy:nodeLabelFont="SansSerif.bold-0-12" cy:nodeLabel="LOC100521614" cy:borderLineType="solid"/>
  </node>
  <node label="100127144" id="-289">
    <att type="string" name="canonicalName" value="100127144"/>
    <att type="list" name="cytoscape.alias.list">
      <att type="string" name="cytoscape.alias.list" value="100127144"/>
    </att>
    <att type="string" name="geneName" value="LOC100127144"/>
    <att type="string" name="id" value="100127144"/>
    <graphics type="ELLIPSE" h="40.0" w="40.0" x="2641.783935546875" y="1722.508544921875" fill="#ccccff" width="1" outline="#666666" cy:nodeTransparency="1.0" cy:nodeLabelFont="SansSerif.bold-0-12" cy:nodeLabel="LOC100127144" cy:borderLineType="solid"/>
  </node>
  <node label="100513046" id="-288">
    <att type="string" name="canonicalName" value="100513046"/>
    <att type="list" name="cytoscape.alias.list">
      <att type="string" name="cytoscape.alias.list" value="100513046"/>
    </att>
    <att type="string" name="geneName" value="LOC100513046"/>
    <att type="string" name="id" value="100513046"/>
    <graphics type="ELLIPSE" h="40.0" w="40.0" x="1611.1478271484375" y="1523.373291015625" fill="#ccccff" width="1" outline="#666666" cy:nodeTransparency="1.0" cy:nodeLabelFont="SansSerif.bold-0-12" cy:nodeLabel="LOC100513046" cy:borderLineType="solid"/>
  </node>
  <node label="100170844" id="-287">
    <att type="string" name="canonicalName" value="100170844"/>
    <att type="list" name="cytoscape.alias.list">
      <att type="string" name="cytoscape.alias.list" value="100170844"/>
    </att>
    <att type="string" name="geneName" value="ADSL"/>
    <att type="string" name="id" value="100170844"/>
    <graphics type="ELLIPSE" h="40.0" w="40.0" x="1815.7265625" y="1357.909423828125" fill="#ccccff" width="1" outline="#666666" cy:nodeTransparency="1.0" cy:nodeLabelFont="SansSerif.bold-0-12" cy:nodeLabel="ADSL" cy:borderLineType="solid"/>
  </node>
  <node label="100736954" id="-286">
    <att type="string" name="canonicalName" value="100736954"/>
    <att type="list" name="cytoscape.alias.list">
      <att type="string" name="cytoscape.alias.list" value="100736954"/>
    </att>
    <att type="string" name="geneName" value="LOC100736954"/>
    <att type="string" name="id" value="100736954"/>
    <graphics type="ELLIPSE" h="40.0" w="40.0" x="1744.15966796875" y="1727.6898193359375" fill="#ccccff" width="1" outline="#666666" cy:nodeTransparency="1.0" cy:nodeLabelFont="SansSerif.bold-0-12" cy:nodeLabel="LOC100736954" cy:borderLineType="solid"/>
  </node>
  <node label="396555" id="-285">
    <att type="string" name="canonicalName" value="396555"/>
    <att type="list" name="cytoscape.alias.list">
      <att type="string" name="cytoscape.alias.list" value="396555"/>
    </att>
    <att type="string" name="geneName" value="PDE3A"/>
    <att type="string" name="id" value="396555"/>
    <graphics type="ELLIPSE" h="40.0" w="40.0" x="1561.5323486328125" y="1460.68798828125" fill="#ccccff" width="1" outline="#666666" cy:nodeTransparency="1.0" cy:nodeLabelFont="SansSerif.bold-0-12" cy:nodeLabel="PDE3A" cy:borderLineType="solid"/>
  </node>
  <node label="100502559" id="-284">
    <att type="string" name="canonicalName" value="100502559"/>
    <att type="list" name="cytoscape.alias.list">
      <att type="string" name="cytoscape.alias.list" value="100502559"/>
    </att>
    <att type="string" name="geneName" value="LDHC"/>
    <att type="string" name="id" value="100502559"/>
    <graphics type="ELLIPSE" h="40.0" w="40.0" x="2638.551513671875" y="1409.7958984375" fill="#ccccff" width="1" outline="#666666" cy:nodeTransparency="1.0" cy:nodeLabelFont="SansSerif.bold-0-12" cy:nodeLabel="LDHC" cy:borderLineType="solid"/>
  </node>
  <node label="100154993" id="-283">
    <att type="string" name="canonicalName" value="100154993"/>
    <att type="list" name="cytoscape.alias.list">
      <att type="string" name="cytoscape.alias.list" value="100154993"/>
    </att>
    <att type="string" name="geneName" value="ACACB"/>
    <att type="string" name="id" value="100154993"/>
    <graphics type="ELLIPSE" h="40.0" w="40.0" x="188.966552734375" y="3759.737060546875" fill="#ccccff" width="1" outline="#666666" cy:nodeTransparency="1.0" cy:nodeLabelFont="SansSerif.bold-0-12" cy:nodeLabel="ACACB" cy:borderLineType="solid"/>
  </node>
  <node label="100520040" id="-282">
    <att type="string" name="canonicalName" value="100520040"/>
    <att type="list" name="cytoscape.alias.list">
      <att type="string" name="cytoscape.alias.list" value="100520040"/>
    </att>
    <att type="string" name="geneName" value="ME3"/>
    <att type="string" name="id" value="100520040"/>
    <graphics type="ELLIPSE" h="40.0" w="40.0" x="2473.262939453125" y="1239.7735595703125" fill="#ccccff" width="1" outline="#666666" cy:nodeTransparency="1.0" cy:nodeLabelFont="SansSerif.bold-0-12" cy:nodeLabel="ME3" cy:borderLineType="solid"/>
  </node>
  <node label="397324" id="-281">
    <att type="string" name="canonicalName" value="397324"/>
    <att type="list" name="cytoscape.alias.list">
      <att type="string" name="cytoscape.alias.list" value="397324"/>
    </att>
    <att type="string" name="geneName" value="ACACA"/>
    <att type="string" name="id" value="397324"/>
    <graphics type="ELLIPSE" h="40.0" w="40.0" x="245.44198608398438" y="4001.142822265625" fill="#ccccff" width="1" outline="#666666" cy:nodeTransparency="1.0" cy:nodeLabelFont="SansSerif.bold-0-12" cy:nodeLabel="ACACA" cy:borderLineType="solid"/>
  </node>
  <node label="397538" id="-280">
    <att type="string" name="canonicalName" value="397538"/>
    <att type="list" name="cytoscape.alias.list">
      <att type="string" name="cytoscape.alias.list" value="397538"/>
    </att>
    <att type="string" name="geneName" value="ME1"/>
    <att type="string" name="id" value="397538"/>
    <graphics type="ELLIPSE" h="40.0" w="40.0" x="2787.849853515625" y="1498.9482421875" fill="#ccccff" width="1" outline="#666666" cy:nodeTransparency="1.0" cy:nodeLabelFont="SansSerif.bold-0-12" cy:nodeLabel="ME1" cy:borderLineType="solid"/>
  </node>
  <node label="100621540" id="-279">
    <att type="string" name="canonicalName" value="100621540"/>
    <att type="list" name="cytoscape.alias.list">
      <att type="string" name="cytoscape.alias.list" value="100621540"/>
    </att>
    <att type="string" name="geneName" value="LDHB"/>
    <att type="string" name="id" value="100621540"/>
    <graphics type="ELLIPSE" h="40.0" w="40.0" x="2795.564453125" y="1190.729736328125" fill="#ccccff" width="1" outline="#666666" cy:nodeTransparency="1.0" cy:nodeLabelFont="SansSerif.bold-0-12" cy:nodeLabel="LDHB" cy:borderLineType="solid"/>
  </node>
  <node label="397630" id="-278">
    <att type="string" name="canonicalName" value="397630"/>
    <att type="list" name="cytoscape.alias.list">
      <att type="string" name="cytoscape.alias.list" value="397630"/>
    </att>
    <att type="string" name="geneName" value="PC"/>
    <att type="string" name="id" value="397630"/>
    <graphics type="ELLIPSE" h="40.0" w="40.0" x="2603.611328125" y="1198.765380859375" fill="#ccccff" width="1" outline="#666666" cy:nodeTransparency="1.0" cy:nodeLabelFont="SansSerif.bold-0-12" cy:nodeLabel="PC" cy:borderLineType="solid"/>
  </node>
  <node label="100294678" id="-277">
    <att type="string" name="canonicalName" value="100294678"/>
    <att type="list" name="cytoscape.alias.list">
      <att type="string" name="cytoscape.alias.list" value="100294678"/>
    </att>
    <att type="string" name="geneName" value="PDHA1"/>
    <att type="string" name="id" value="100294678"/>
    <graphics type="ELLIPSE" h="40.0" w="40.0" x="2681.59033203125" y="1270.326171875" fill="#ccccff" width="1" outline="#666666" cy:nodeTransparency="1.0" cy:nodeLabelFont="SansSerif.bold-0-12" cy:nodeLabel="PDHA1" cy:borderLineType="solid"/>
  </node>
  <node label="100516042" id="-276">
    <att type="string" name="canonicalName" value="100516042"/>
    <att type="list" name="cytoscape.alias.list">
      <att type="string" name="cytoscape.alias.list" value="100516042"/>
    </att>
    <att type="string" name="geneName" value="PDHB"/>
    <att type="string" name="id" value="100516042"/>
    <graphics type="ELLIPSE" h="40.0" w="40.0" x="2831.114501953125" y="1252.8895263671875" fill="#ccccff" width="1" outline="#666666" cy:nodeTransparency="1.0" cy:nodeLabelFont="SansSerif.bold-0-12" cy:nodeLabel="PDHB" cy:borderLineType="solid"/>
  </node>
  <node label="100154828" id="-275">
    <att type="string" name="canonicalName" value="100154828"/>
    <att type="list" name="cytoscape.alias.list">
      <att type="string" name="cytoscape.alias.list" value="100154828"/>
    </att>
    <att type="string" name="geneName" value="LOC100154828"/>
    <att type="string" name="id" value="100154828"/>
    <graphics type="ELLIPSE" h="40.0" w="40.0" x="253.41946411132812" y="3727.4189453125" fill="#ccccff" width="1" outline="#666666" cy:nodeTransparency="1.0" cy:nodeLabelFont="SansSerif.bold-0-12" cy:nodeLabel="LOC100154828" cy:borderLineType="solid"/>
  </node>
  <node label="396894" id="-274">
    <att type="string" name="canonicalName" value="396894"/>
    <att type="list" name="cytoscape.alias.list">
      <att type="string" name="cytoscape.alias.list" value="396894"/>
    </att>
    <att type="string" name="geneName" value="MDH1"/>
    <att type="string" name="id" value="396894"/>
    <graphics type="ELLIPSE" h="40.0" w="40.0" x="2913.69091796875" y="1545.3070068359375" fill="#ccccff" width="1" outline="#666666" cy:nodeTransparency="1.0" cy:nodeLabelFont="SansSerif.bold-0-12" cy:nodeLabel="MDH1" cy:borderLineType="solid"/>
  </node>
  <node label="397039" id="-273">
    <att type="string" name="canonicalName" value="397039"/>
    <att type="list" name="cytoscape.alias.list">
      <att type="string" name="cytoscape.alias.list" value="397039"/>
    </att>
    <att type="string" name="geneName" value="MDH2"/>
    <att type="string" name="id" value="397039"/>
    <graphics type="ELLIPSE" h="40.0" w="40.0" x="2703.64208984375" y="1044.9423828125" fill="#ccccff" width="1" outline="#666666" cy:nodeTransparency="1.0" cy:nodeLabelFont="SansSerif.bold-0-12" cy:nodeLabel="MDH2" cy:borderLineType="solid"/>
  </node>
  <node label="407245" id="-272">
    <att type="string" name="canonicalName" value="407245"/>
    <att type="list" name="cytoscape.alias.list">
      <att type="string" name="cytoscape.alias.list" value="407245"/>
    </att>
    <att type="string" name="geneName" value="LDHA"/>
    <att type="string" name="id" value="407245"/>
    <graphics type="ELLIPSE" h="40.0" w="40.0" x="2852.39990234375" y="1350.42236328125" fill="#ccccff" width="1" outline="#666666" cy:nodeTransparency="1.0" cy:nodeLabelFont="SansSerif.bold-0-12" cy:nodeLabel="LDHA" cy:borderLineType="solid"/>
  </node>
  <node label="100524659" id="-271">
    <att type="string" name="canonicalName" value="100524659"/>
    <att type="list" name="cytoscape.alias.list">
      <att type="string" name="cytoscape.alias.list" value="100524659"/>
    </att>
    <att type="string" name="geneName" value="ME2"/>
    <att type="string" name="id" value="100524659"/>
    <graphics type="ELLIPSE" h="40.0" w="40.0" x="2985.75244140625" y="1386.6566162109375" fill="#ccccff" width="1" outline="#666666" cy:nodeTransparency="1.0" cy:nodeLabelFont="SansSerif.bold-0-12" cy:nodeLabel="ME2" cy:borderLineType="solid"/>
  </node>
  <node label="100524103" id="-270">
    <att type="string" name="canonicalName" value="100524103"/>
    <att type="list" name="cytoscape.alias.list">
      <att type="string" name="cytoscape.alias.list" value="100524103"/>
    </att>
    <att type="string" name="geneName" value="PCCA"/>
    <att type="string" name="id" value="100524103"/>
    <graphics type="ELLIPSE" h="40.0" w="40.0" x="219.6483154296875" y="3602.23876953125" fill="#ccccff" width="1" outline="#666666" cy:nodeTransparency="1.0" cy:nodeLabelFont="SansSerif.bold-0-12" cy:nodeLabel="PCCA" cy:borderLineType="solid"/>
  </node>
  <node label="397026" id="-269">
    <att type="string" name="canonicalName" value="397026"/>
    <att type="list" name="cytoscape.alias.list">
      <att type="string" name="cytoscape.alias.list" value="397026"/>
    </att>
    <att type="string" name="geneName" value="SUCLG2"/>
    <att type="string" name="id" value="397026"/>
    <graphics type="ELLIPSE" h="40.0" w="40.0" x="2770.48388671875" y="1426.02490234375" fill="#ccccff" width="1" outline="#666666" cy:nodeTransparency="1.0" cy:nodeLabelFont="SansSerif.bold-0-12" cy:nodeLabel="SUCLG2" cy:borderLineType="solid"/>
  </node>
  <node label="399540" id="-268">
    <att type="string" name="canonicalName" value="399540"/>
    <att type="list" name="cytoscape.alias.list">
      <att type="string" name="cytoscape.alias.list" value="399540"/>
    </att>
    <att type="string" name="geneName" value="SUCLA2"/>
    <att type="string" name="id" value="399540"/>
    <graphics type="ELLIPSE" h="40.0" w="40.0" x="3000.92431640625" y="1178.0543212890625" fill="#ccccff" width="1" outline="#666666" cy:nodeTransparency="1.0" cy:nodeLabelFont="SansSerif.bold-0-12" cy:nodeLabel="SUCLA2" cy:borderLineType="solid"/>
  </node>
  <node label="100153697" id="-267">
    <att type="string" name="canonicalName" value="100153697"/>
    <att type="list" name="cytoscape.alias.list">
      <att type="string" name="cytoscape.alias.list" value="100153697"/>
    </att>
    <att type="string" name="geneName" value="LOC100153697"/>
    <att type="string" name="id" value="100153697"/>
    <graphics type="ELLIPSE" h="40.0" w="40.0" x="3122.70703125" y="1124.7890625" fill="#ccccff" width="1" outline="#666666" cy:nodeTransparency="1.0" cy:nodeLabelFont="SansSerif.bold-0-12" cy:nodeLabel="LOC100153697" cy:borderLineType="solid"/>
  </node>
  <node label="399539" id="-266">
    <att type="string" name="canonicalName" value="399539"/>
    <att type="list" name="cytoscape.alias.list">
      <att type="string" name="cytoscape.alias.list" value="399539"/>
    </att>
    <att type="string" name="geneName" value="SUCLG1"/>
    <att type="string" name="id" value="399539"/>
    <graphics type="ELLIPSE" h="40.0" w="40.0" x="2765.44140625" y="1340.8414306640625" fill="#ccccff" width="1" outline="#666666" cy:nodeTransparency="1.0" cy:nodeLabelFont="SansSerif.bold-0-12" cy:nodeLabel="SUCLG1" cy:borderLineType="solid"/>
  </node>
  <node label="399535" id="-265">
    <att type="string" name="canonicalName" value="399535"/>
    <att type="list" name="cytoscape.alias.list">
      <att type="string" name="cytoscape.alias.list" value="399535"/>
    </att>
    <att type="string" name="geneName" value="MUT"/>
    <att type="string" name="id" value="399535"/>
    <graphics type="ELLIPSE" h="40.0" w="40.0" x="2889.161376953125" y="1275.4241943359375" fill="#ccccff" width="1" outline="#666666" cy:nodeTransparency="1.0" cy:nodeLabelFont="SansSerif.bold-0-12" cy:nodeLabel="MUT" cy:borderLineType="solid"/>
  </node>
  <node label="100511735" id="-264">
    <att type="string" name="canonicalName" value="100511735"/>
    <att type="list" name="cytoscape.alias.list">
      <att type="string" name="cytoscape.alias.list" value="100511735"/>
    </att>
    <att type="string" name="geneName" value="RAPGEF1"/>
    <att type="string" name="id" value="100511735"/>
    <graphics type="ELLIPSE" h="40.0" w="40.0" x="771.0458984375" y="3303.78515625" fill="#ccccff" width="1" outline="#666666" cy:nodeTransparency="1.0" cy:nodeLabelFont="SansSerif.bold-0-12" cy:nodeLabel="RAPGEF1" cy:borderLineType="solid"/>
  </node>
  <node label="100505408" id="-263">
    <att type="string" name="canonicalName" value="100505408"/>
    <att type="list" name="cytoscape.alias.list">
      <att type="string" name="cytoscape.alias.list" value="100505408"/>
    </att>
    <att type="string" name="geneName" value="TSC2"/>
    <att type="string" name="id" value="100505408"/>
    <graphics type="ELLIPSE" h="40.0" w="40.0" x="1921.5631103515625" y="2782.996337890625" fill="#ccccff" width="1" outline="#666666" cy:nodeTransparency="1.0" cy:nodeLabelFont="SansSerif.bold-0-12" cy:nodeLabel="TSC2" cy:borderLineType="solid"/>
  </node>
  <node label="100192445" id="-262">
    <att type="string" name="canonicalName" value="100192445"/>
    <att type="list" name="cytoscape.alias.list">
      <att type="string" name="cytoscape.alias.list" value="100192445"/>
    </att>
    <att type="string" name="geneName" value="PDPK1"/>
    <att type="string" name="id" value="100192445"/>
    <graphics type="ELLIPSE" h="40.0" w="40.0" x="2149.802490234375" y="2959.436279296875" fill="#ccccff" width="1" outline="#666666" cy:nodeTransparency="1.0" cy:nodeLabelFont="SansSerif.bold-0-12" cy:nodeLabel="PDPK1" cy:borderLineType="solid"/>
  </node>
  <node label="100512153" id="-261">
    <att type="string" name="canonicalName" value="100512153"/>
    <att type="list" name="cytoscape.alias.list">
      <att type="string" name="cytoscape.alias.list" value="100512153"/>
    </att>
    <att type="string" name="geneName" value="RPS6KB2"/>
    <att type="string" name="id" value="100512153"/>
    <graphics type="ELLIPSE" h="40.0" w="40.0" x="2200.487548828125" y="3107.501953125" fill="#ccccff" width="1" outline="#666666" cy:nodeTransparency="1.0" cy:nodeLabelFont="SansSerif.bold-0-12" cy:nodeLabel="RPS6KB2" cy:borderLineType="solid"/>
  </node>
  <node label="397583" id="-260">
    <att type="string" name="canonicalName" value="397583"/>
    <att type="list" name="cytoscape.alias.list">
      <att type="string" name="cytoscape.alias.list" value="397583"/>
    </att>
    <att type="string" name="geneName" value="LIPE"/>
    <att type="string" name="id" value="397583"/>
    <graphics type="ELLIPSE" h="40.0" w="40.0" x="948.7933959960938" y="2250.66015625" fill="#ccccff" width="1" outline="#666666" cy:nodeTransparency="1.0" cy:nodeLabelFont="SansSerif.bold-0-12" cy:nodeLabel="LIPE" cy:borderLineType="solid"/>
  </node>
  <node label="397493" id="-259">
    <att type="string" name="canonicalName" value="397493"/>
    <att type="list" name="cytoscape.alias.list">
      <att type="string" name="cytoscape.alias.list" value="397493"/>
    </att>
    <att type="string" name="geneName" value="PRKAR2A"/>
    <att type="string" name="id" value="397493"/>
    <graphics type="ELLIPSE" h="40.0" w="40.0" x="852.4261474609375" y="2173.47802734375" fill="#ccccff" width="1" outline="#666666" cy:nodeTransparency="1.0" cy:nodeLabelFont="SansSerif.bold-0-12" cy:nodeLabel="PRKAR2A" cy:borderLineType="solid"/>
  </node>
  <node label="574064" id="-258">
    <att type="string" name="canonicalName" value="574064"/>
    <att type="list" name="cytoscape.alias.list">
      <att type="string" name="cytoscape.alias.list" value="574064"/>
    </att>
    <att type="string" name="geneName" value="GYS1"/>
    <att type="string" name="id" value="574064"/>
    <graphics type="ELLIPSE" h="40.0" w="40.0" x="1220.433349609375" y="1650.6993408203125" fill="#ccccff" width="1" outline="#666666" cy:nodeTransparency="1.0" cy:nodeLabelFont="SansSerif.bold-0-12" cy:nodeLabel="GYS1" cy:borderLineType="solid"/>
  </node>
  <node label="100154056" id="-257">
    <att type="string" name="canonicalName" value="100154056"/>
    <att type="list" name="cytoscape.alias.list">
      <att type="string" name="cytoscape.alias.list" value="100154056"/>
    </att>
    <att type="string" name="geneName" value="CALM1"/>
    <att type="string" name="id" value="100154056"/>
    <graphics type="ELLIPSE" h="40.0" w="40.0" x="924.2461547851562" y="6573.18896484375" fill="#ccccff" width="1" outline="#666666" cy:nodeTransparency="1.0" cy:nodeLabelFont="SansSerif.bold-0-12" cy:nodeLabel="CALM1" cy:borderLineType="solid"/>
  </node>
  <node label="100141306" id="-256">
    <att type="string" name="canonicalName" value="100141306"/>
    <att type="list" name="cytoscape.alias.list">
      <att type="string" name="cytoscape.alias.list" value="100141306"/>
    </att>
    <att type="string" name="geneName" value="PYGL"/>
    <att type="string" name="id" value="100141306"/>
    <graphics type="ELLIPSE" h="40.0" w="40.0" x="921.591796875" y="6680.92041015625" fill="#ccccff" width="1" outline="#666666" cy:nodeTransparency="1.0" cy:nodeLabelFont="SansSerif.bold-0-12" cy:nodeLabel="PYGL" cy:borderLineType="solid"/>
  </node>
  <node label="397378" id="-255">
    <att type="string" name="canonicalName" value="397378"/>
    <att type="list" name="cytoscape.alias.list">
      <att type="string" name="cytoscape.alias.list" value="397378"/>
    </att>
    <att type="string" name="geneName" value="PPP1CB"/>
    <att type="string" name="id" value="397378"/>
    <graphics type="ELLIPSE" h="40.0" w="40.0" x="1964.289794921875" y="2874.43017578125" fill="#ccccff" width="1" outline="#666666" cy:nodeTransparency="1.0" cy:nodeLabelFont="SansSerif.bold-0-12" cy:nodeLabel="PPP1CB" cy:borderLineType="solid"/>
  </node>
  <node label="397504" id="-254">
    <att type="string" name="canonicalName" value="397504"/>
    <att type="list" name="cytoscape.alias.list">
      <att type="string" name="cytoscape.alias.list" value="397504"/>
    </att>
    <att type="string" name="geneName" value="PRKAA2"/>
    <att type="string" name="id" value="397504"/>
    <graphics type="ELLIPSE" h="40.0" w="40.0" x="121.63381958007812" y="4028.407958984375" fill="#ccccff" width="1" outline="#666666" cy:nodeTransparency="1.0" cy:nodeLabelFont="SansSerif.bold-0-12" cy:nodeLabel="PRKAA2" cy:borderLineType="solid"/>
  </node>
  <node label="100512686" id="-253">
    <att type="string" name="canonicalName" value="100512686"/>
    <att type="list" name="cytoscape.alias.list">
      <att type="string" name="cytoscape.alias.list" value="100512686"/>
    </att>
    <att type="string" name="geneName" value="IRS1"/>
    <att type="string" name="id" value="100512686"/>
    <graphics type="ELLIPSE" h="40.0" w="40.0" x="2205.2314453125" y="2533.435302734375" fill="#ccccff" width="1" outline="#666666" cy:nodeTransparency="1.0" cy:nodeLabelFont="SansSerif.bold-0-12" cy:nodeLabel="IRS1" cy:borderLineType="solid"/>
  </node>
  <node label="100192436" id="-252">
    <att type="string" name="canonicalName" value="100192436"/>
    <att type="list" name="cytoscape.alias.list">
      <att type="string" name="cytoscape.alias.list" value="100192436"/>
    </att>
    <att type="string" name="geneName" value="GRB2"/>
    <att type="string" name="id" value="100192436"/>
    <graphics type="ELLIPSE" h="40.0" w="40.0" x="2333.48876953125" y="2549.901123046875" fill="#ccccff" width="1" outline="#666666" cy:nodeTransparency="1.0" cy:nodeLabelFont="SansSerif.bold-0-12" cy:nodeLabel="GRB2" cy:borderLineType="solid"/>
  </node>
  <node label="100519810" id="-251">
    <att type="string" name="canonicalName" value="100519810"/>
    <att type="list" name="cytoscape.alias.list">
      <att type="string" name="cytoscape.alias.list" value="100519810"/>
    </att>
    <att type="string" name="geneName" value="PHKA2"/>
    <att type="string" name="id" value="100519810"/>
    <graphics type="ELLIPSE" h="40.0" w="40.0" x="1177.25732421875" y="1805.295166015625" fill="#ccccff" width="1" outline="#666666" cy:nodeTransparency="1.0" cy:nodeLabelFont="SansSerif.bold-0-12" cy:nodeLabel="PHKA2" cy:borderLineType="solid"/>
  </node>
  <node label="100038023" id="-250">
    <att type="string" name="canonicalName" value="100038023"/>
    <att type="list" name="cytoscape.alias.list">
      <att type="string" name="cytoscape.alias.list" value="100038023"/>
    </att>
    <att type="string" name="geneName" value="RPS6"/>
    <att type="string" name="id" value="100038023"/>
    <graphics type="ELLIPSE" h="40.0" w="40.0" x="2243.0908203125" y="3228.36181640625" fill="#ccccff" width="1" outline="#666666" cy:nodeTransparency="1.0" cy:nodeLabelFont="SansSerif.bold-0-12" cy:nodeLabel="RPS6" cy:borderLineType="solid"/>
  </node>
  <node label="396805" id="-249">
    <att type="string" name="canonicalName" value="396805"/>
    <att type="list" name="cytoscape.alias.list">
      <att type="string" name="cytoscape.alias.list" value="396805"/>
    </att>
    <att type="string" name="geneName" value="PGR"/>
    <att type="string" name="id" value="396805"/>
    <graphics type="ELLIPSE" h="40.0" w="40.0" x="2383.53759765625" y="2767.4970703125" fill="#ccccff" width="1" outline="#666666" cy:nodeTransparency="1.0" cy:nodeLabelFont="SansSerif.bold-0-12" cy:nodeLabel="PGR" cy:borderLineType="solid"/>
  </node>
  <node label="397523" id="-248">
    <att type="string" name="canonicalName" value="397523"/>
    <att type="list" name="cytoscape.alias.list">
      <att type="string" name="cytoscape.alias.list" value="397523"/>
    </att>
    <att type="string" name="geneName" value="GNAI2"/>
    <att type="string" name="id" value="397523"/>
    <graphics type="ELLIPSE" h="40.0" w="40.0" x="2311.130615234375" y="1710.1826171875" fill="#ccccff" width="1" outline="#666666" cy:nodeTransparency="1.0" cy:nodeLabelFont="SansSerif.bold-0-12" cy:nodeLabel="GNAI2" cy:borderLineType="solid"/>
  </node>
  <node label="574061" id="-247">
    <att type="string" name="canonicalName" value="574061"/>
    <att type="list" name="cytoscape.alias.list">
      <att type="string" name="cytoscape.alias.list" value="574061"/>
    </att>
    <att type="string" name="geneName" value="SPDYA"/>
    <att type="string" name="id" value="574061"/>
    <graphics type="ELLIPSE" h="40.0" w="40.0" x="821.591796875" y="6573.18896484375" fill="#ccccff" width="1" outline="#666666" cy:nodeTransparency="1.0" cy:nodeLabelFont="SansSerif.bold-0-12" cy:nodeLabel="SPDYA" cy:borderLineType="solid"/>
  </node>
  <node label="100155762" id="-246">
    <att type="string" name="canonicalName" value="100155762"/>
    <att type="list" name="cytoscape.alias.list">
      <att type="string" name="cytoscape.alias.list" value="100155762"/>
    </att>
    <att type="string" name="geneName" value="CDK1"/>
    <att type="string" name="id" value="100155762"/>
    <graphics type="ELLIPSE" h="40.0" w="40.0" x="818.5743408203125" y="6680.9111328125" fill="#ccccff" width="1" outline="#666666" cy:nodeTransparency="1.0" cy:nodeLabelFont="SansSerif.bold-0-12" cy:nodeLabel="CDK1" cy:borderLineType="solid"/>
  </node>
  <node label="100627208" id="-245">
    <att type="string" name="canonicalName" value="100627208"/>
    <att type="list" name="cytoscape.alias.list">
      <att type="string" name="cytoscape.alias.list" value="100627208"/>
    </att>
    <att type="string" name="geneName" value="LOC100627208"/>
    <att type="string" name="id" value="100627208"/>
    <graphics type="ELLIPSE" h="40.0" w="40.0" x="2066.50341796875" y="6069.0263671875" fill="#ccccff" width="1" outline="#666666" cy:nodeTransparency="1.0" cy:nodeLabelFont="SansSerif.bold-0-12" cy:nodeLabel="LOC100627208" cy:borderLineType="solid"/>
  </node>
  <node label="100522294" id="-244">
    <att type="string" name="canonicalName" value="100522294"/>
    <att type="list" name="cytoscape.alias.list">
      <att type="string" name="cytoscape.alias.list" value="100522294"/>
    </att>
    <att type="string" name="geneName" value="RPS6KA6"/>
    <att type="string" name="id" value="100522294"/>
    <graphics type="ELLIPSE" h="40.0" w="40.0" x="1995.2208251953125" y="6152.00244140625" fill="#ccccff" width="1" outline="#666666" cy:nodeTransparency="1.0" cy:nodeLabelFont="SansSerif.bold-0-12" cy:nodeLabel="RPS6KA6" cy:borderLineType="solid"/>
  </node>
  <node label="100522174" id="-243">
    <att type="string" name="canonicalName" value="100522174"/>
    <att type="list" name="cytoscape.alias.list">
      <att type="string" name="cytoscape.alias.list" value="100522174"/>
    </att>
    <att type="string" name="geneName" value="RPS6KA3"/>
    <att type="string" name="id" value="100522174"/>
    <graphics type="ELLIPSE" h="40.0" w="40.0" x="2130.35986328125" y="5980.2080078125" fill="#ccccff" width="1" outline="#666666" cy:nodeTransparency="1.0" cy:nodeLabelFont="SansSerif.bold-0-12" cy:nodeLabel="RPS6KA3" cy:borderLineType="solid"/>
  </node>
  <node label="397350" id="-242">
    <att type="string" name="canonicalName" value="397350"/>
    <att type="list" name="cytoscape.alias.list">
      <att type="string" name="cytoscape.alias.list" value="397350"/>
    </att>
    <att type="string" name="geneName" value="IGF1R"/>
    <att type="string" name="id" value="397350"/>
    <graphics type="ELLIPSE" h="40.0" w="40.0" x="2280.708984375" y="2449.20166015625" fill="#ccccff" width="1" outline="#666666" cy:nodeTransparency="1.0" cy:nodeLabelFont="SansSerif.bold-0-12" cy:nodeLabel="IGF1R" cy:borderLineType="solid"/>
  </node>
  <node label="397491" id="-241">
    <att type="string" name="canonicalName" value="397491"/>
    <att type="list" name="cytoscape.alias.list">
      <att type="string" name="cytoscape.alias.list" value="397491"/>
    </att>
    <att type="string" name="geneName" value="IGF1"/>
    <att type="string" name="id" value="397491"/>
    <graphics type="ELLIPSE" h="40.0" w="40.0" x="2190.948974609375" y="2637.619384765625" fill="#ccccff" width="1" outline="#666666" cy:nodeTransparency="1.0" cy:nodeLabelFont="SansSerif.bold-0-12" cy:nodeLabel="IGF1" cy:borderLineType="solid"/>
  </node>
  <node label="100513511" id="-240">
    <att type="string" name="canonicalName" value="100513511"/>
    <att type="list" name="cytoscape.alias.list">
      <att type="string" name="cytoscape.alias.list" value="100513511"/>
    </att>
    <att type="string" name="geneName" value="MTFMT"/>
    <att type="string" name="id" value="100513511"/>
    <graphics type="ELLIPSE" h="40.0" w="40.0" x="59.717926025390625" y="5634.9677734375" fill="#ccccff" width="1" outline="#666666" cy:nodeTransparency="1.0" cy:nodeLabelFont="SansSerif.bold-0-12" cy:nodeLabel="MTFMT" cy:borderLineType="solid"/>
  </node>
  <node label="100525912" id="-239">
    <att type="string" name="canonicalName" value="100525912"/>
    <att type="list" name="cytoscape.alias.list">
      <att type="string" name="cytoscape.alias.list" value="100525912"/>
    </att>
    <att type="string" name="geneName" value="DHFR"/>
    <att type="string" name="id" value="100525912"/>
    <graphics type="ELLIPSE" h="40.0" w="40.0" x="154.98947143554688" y="5579.4306640625" fill="#ccccff" width="1" outline="#666666" cy:nodeTransparency="1.0" cy:nodeLabelFont="SansSerif.bold-0-12" cy:nodeLabel="DHFR" cy:borderLineType="solid"/>
  </node>
  <node label="100626911" id="-238">
    <att type="string" name="canonicalName" value="100626911"/>
    <att type="list" name="cytoscape.alias.list">
      <att type="string" name="cytoscape.alias.list" value="100626911"/>
    </att>
    <att type="string" name="geneName" value="LOC100626911"/>
    <att type="string" name="id" value="100626911"/>
    <graphics type="ELLIPSE" h="40.0" w="40.0" x="0.0" y="5711.2763671875" fill="#ccccff" width="1" outline="#666666" cy:nodeTransparency="1.0" cy:nodeLabelFont="SansSerif.bold-0-12" cy:nodeLabel="LOC100626911" cy:borderLineType="solid"/>
  </node>
  <node label="100514459" id="-237">
    <att type="string" name="canonicalName" value="100514459"/>
    <att type="list" name="cytoscape.alias.list">
      <att type="string" name="cytoscape.alias.list" value="100514459"/>
    </att>
    <att type="string" name="geneName" value="LOC100514459"/>
    <att type="string" name="id" value="100514459"/>
    <graphics type="ELLIPSE" h="40.0" w="40.0" x="68.40045166015625" y="5760.130859375" fill="#ccccff" width="1" outline="#666666" cy:nodeTransparency="1.0" cy:nodeLabelFont="SansSerif.bold-0-12" cy:nodeLabel="LOC100514459" cy:borderLineType="solid"/>
  </node>
  <node label="100154722" id="-236">
    <att type="string" name="canonicalName" value="100154722"/>
    <att type="list" name="cytoscape.alias.list">
      <att type="string" name="cytoscape.alias.list" value="100154722"/>
    </att>
    <att type="string" name="geneName" value="LOC100154722"/>
    <att type="string" name="id" value="100154722"/>
    <graphics type="ELLIPSE" h="40.0" w="40.0" x="122.8409423828125" y="5683.27978515625" fill="#ccccff" width="1" outline="#666666" cy:nodeTransparency="1.0" cy:nodeLabelFont="SansSerif.bold-0-12" cy:nodeLabel="LOC100154722" cy:borderLineType="solid"/>
  </node>
  <node label="414382" id="-235">
    <att type="string" name="canonicalName" value="414382"/>
    <att type="list" name="cytoscape.alias.list">
      <att type="string" name="cytoscape.alias.list" value="414382"/>
    </att>
    <att type="string" name="geneName" value="MTHFD1"/>
    <att type="string" name="id" value="414382"/>
    <graphics type="ELLIPSE" h="40.0" w="40.0" x="718.5743408203125" y="6573.18896484375" fill="#ccccff" width="1" outline="#666666" cy:nodeTransparency="1.0" cy:nodeLabelFont="SansSerif.bold-0-12" cy:nodeLabel="MTHFD1" cy:borderLineType="solid"/>
  </node>
  <node label="100525706" id="-234">
    <att type="string" name="canonicalName" value="100525706"/>
    <att type="list" name="cytoscape.alias.list">
      <att type="string" name="cytoscape.alias.list" value="100525706"/>
    </att>
    <att type="string" name="geneName" value="LOC100525706"/>
    <att type="string" name="id" value="100525706"/>
    <graphics type="ELLIPSE" h="40.0" w="40.0" x="715.7777099609375" y="6680.9169921875" fill="#ccccff" width="1" outline="#666666" cy:nodeTransparency="1.0" cy:nodeLabelFont="SansSerif.bold-0-12" cy:nodeLabel="LOC100525706" cy:borderLineType="solid"/>
  </node>
  <node label="100525789" id="-233">
    <att type="string" name="canonicalName" value="100525789"/>
    <att type="list" name="cytoscape.alias.list">
      <att type="string" name="cytoscape.alias.list" value="100525789"/>
    </att>
    <att type="string" name="geneName" value="LOC100525789"/>
    <att type="string" name="id" value="100525789"/>
    <graphics type="ELLIPSE" h="40.0" w="40.0" x="1519.887939453125" y="3120.28173828125" fill="#ccccff" width="1" outline="#666666" cy:nodeTransparency="1.0" cy:nodeLabelFont="SansSerif.bold-0-12" cy:nodeLabel="LOC100525789" cy:borderLineType="solid"/>
  </node>
  <node label="100620584" id="-232">
    <att type="string" name="canonicalName" value="100620584"/>
    <att type="list" name="cytoscape.alias.list">
      <att type="string" name="cytoscape.alias.list" value="100620584"/>
    </att>
    <att type="string" name="geneName" value="LOC100620584"/>
    <att type="string" name="id" value="100620584"/>
    <graphics type="ELLIPSE" h="40.0" w="40.0" x="2024.6414794921875" y="2912.265869140625" fill="#ccccff" width="1" outline="#666666" cy:nodeTransparency="1.0" cy:nodeLabelFont="SansSerif.bold-0-12" cy:nodeLabel="LOC100620584" cy:borderLineType="solid"/>
  </node>
  <node label="100516621" id="-231">
    <att type="string" name="canonicalName" value="100516621"/>
    <att type="list" name="cytoscape.alias.list">
      <att type="string" name="cytoscape.alias.list" value="100516621"/>
    </att>
    <att type="string" name="geneName" value="LOC100516621"/>
    <att type="string" name="id" value="100516621"/>
    <graphics type="ELLIPSE" h="40.0" w="40.0" x="1550.7413330078125" y="3247.625" fill="#ccccff" width="1" outline="#666666" cy:nodeTransparency="1.0" cy:nodeLabelFont="SansSerif.bold-0-12" cy:nodeLabel="LOC100516621" cy:borderLineType="solid"/>
  </node>
  <node label="397184" id="-230">
    <att type="string" name="canonicalName" value="397184"/>
    <att type="list" name="cytoscape.alias.list">
      <att type="string" name="cytoscape.alias.list" value="397184"/>
    </att>
    <att type="string" name="geneName" value="PRKCA"/>
    <att type="string" name="id" value="397184"/>
    <graphics type="ELLIPSE" h="40.0" w="40.0" x="2757.525390625" y="2336.90283203125" fill="#ccccff" width="1" outline="#666666" cy:nodeTransparency="1.0" cy:nodeLabelFont="SansSerif.bold-0-12" cy:nodeLabel="PRKCA" cy:borderLineType="solid"/>
  </node>
  <node label="396665" id="-229">
    <att type="string" name="canonicalName" value="396665"/>
    <att type="list" name="cytoscape.alias.list">
      <att type="string" name="cytoscape.alias.list" value="396665"/>
    </att>
    <att type="string" name="geneName" value="TGFBR1"/>
    <att type="string" name="id" value="396665"/>
    <graphics type="ELLIPSE" h="40.0" w="40.0" x="615.7777099609375" y="6573.18896484375" fill="#ccccff" width="1" outline="#666666" cy:nodeTransparency="1.0" cy:nodeLabelFont="SansSerif.bold-0-12" cy:nodeLabel="TGFBR1" cy:borderLineType="solid"/>
  </node>
  <node label="100524813" id="-228">
    <att type="string" name="canonicalName" value="100524813"/>
    <att type="list" name="cytoscape.alias.list">
      <att type="string" name="cytoscape.alias.list" value="100524813"/>
    </att>
    <att type="string" name="geneName" value="DAXX"/>
    <att type="string" name="id" value="100524813"/>
    <graphics type="ELLIPSE" h="40.0" w="40.0" x="613.4561157226562" y="6680.92822265625" fill="#ccccff" width="1" outline="#666666" cy:nodeTransparency="1.0" cy:nodeLabelFont="SansSerif.bold-0-12" cy:nodeLabel="DAXX" cy:borderLineType="solid"/>
  </node>
  <node label="100626141" id="-227">
    <att type="string" name="canonicalName" value="100626141"/>
    <att type="list" name="cytoscape.alias.list">
      <att type="string" name="cytoscape.alias.list" value="100626141"/>
    </att>
    <att type="string" name="geneName" value="ELK4"/>
    <att type="string" name="id" value="100626141"/>
    <graphics type="ELLIPSE" h="40.0" w="40.0" x="1586.9808349609375" y="1302.340576171875" fill="#ccccff" width="1" outline="#666666" cy:nodeTransparency="1.0" cy:nodeLabelFont="SansSerif.bold-0-12" cy:nodeLabel="ELK4" cy:borderLineType="solid"/>
  </node>
  <node label="100623524" id="-226">
    <att type="string" name="canonicalName" value="100623524"/>
    <att type="list" name="cytoscape.alias.list">
      <att type="string" name="cytoscape.alias.list" value="100623524"/>
    </att>
    <att type="string" name="geneName" value="LOC100623524"/>
    <att type="string" name="id" value="100623524"/>
    <graphics type="ELLIPSE" h="40.0" w="40.0" x="1585.6448974609375" y="657.3040771484375" fill="#ccccff" width="1" outline="#666666" cy:nodeTransparency="1.0" cy:nodeLabelFont="SansSerif.bold-0-12" cy:nodeLabel="LOC100623524" cy:borderLineType="solid"/>
  </node>
  <node label="100524101" id="-225">
    <att type="string" name="canonicalName" value="100524101"/>
    <att type="list" name="cytoscape.alias.list">
      <att type="string" name="cytoscape.alias.list" value="100524101"/>
    </att>
    <att type="string" name="geneName" value="CACNB2"/>
    <att type="string" name="id" value="100524101"/>
    <graphics type="ELLIPSE" h="40.0" w="40.0" x="1619.02880859375" y="5579.4306640625" fill="#ccccff" width="1" outline="#666666" cy:nodeTransparency="1.0" cy:nodeLabelFont="SansSerif.bold-0-12" cy:nodeLabel="CACNB2" cy:borderLineType="solid"/>
  </node>
  <node label="100522721" id="-224">
    <att type="string" name="canonicalName" value="100522721"/>
    <att type="list" name="cytoscape.alias.list">
      <att type="string" name="cytoscape.alias.list" value="100522721"/>
    </att>
    <att type="string" name="geneName" value="RASGRP1"/>
    <att type="string" name="id" value="100522721"/>
    <graphics type="ELLIPSE" h="40.0" w="40.0" x="1691.2164306640625" y="5663.86669921875" fill="#ccccff" width="1" outline="#666666" cy:nodeTransparency="1.0" cy:nodeLabelFont="SansSerif.bold-0-12" cy:nodeLabel="RASGRP1" cy:borderLineType="solid"/>
  </node>
  <node label="100517574" id="-223">
    <att type="string" name="canonicalName" value="100517574"/>
    <att type="list" name="cytoscape.alias.list">
      <att type="string" name="cytoscape.alias.list" value="100517574"/>
    </att>
    <att type="string" name="geneName" value="LOC100517574"/>
    <att type="string" name="id" value="100517574"/>
    <graphics type="ELLIPSE" h="40.0" w="40.0" x="1541.7886962890625" y="3602.23876953125" fill="#ccccff" width="1" outline="#666666" cy:nodeTransparency="1.0" cy:nodeLabelFont="SansSerif.bold-0-12" cy:nodeLabel="LOC100517574" cy:borderLineType="solid"/>
  </node>
  <node label="396610" id="-222">
    <att type="string" name="canonicalName" value="396610"/>
    <att type="list" name="cytoscape.alias.list">
      <att type="string" name="cytoscape.alias.list" value="396610"/>
    </att>
    <att type="string" name="geneName" value="MAPK8"/>
    <att type="string" name="id" value="396610"/>
    <graphics type="ELLIPSE" h="40.0" w="40.0" x="1531.237060546875" y="3717.580810546875" fill="#ccccff" width="1" outline="#666666" cy:nodeTransparency="1.0" cy:nodeLabelFont="SansSerif.bold-0-12" cy:nodeLabel="MAPK8" cy:borderLineType="solid"/>
  </node>
  <node label="100739797" id="-221">
    <att type="string" name="canonicalName" value="100739797"/>
    <att type="list" name="cytoscape.alias.list">
      <att type="string" name="cytoscape.alias.list" value="100739797"/>
    </att>
    <att type="string" name="geneName" value="LOC100739797"/>
    <att type="string" name="id" value="100739797"/>
    <graphics type="ELLIPSE" h="40.0" w="40.0" x="2403.40966796875" y="2602.89404296875" fill="#ccccff" width="1" outline="#666666" cy:nodeTransparency="1.0" cy:nodeLabelFont="SansSerif.bold-0-12" cy:nodeLabel="LOC100739797" cy:borderLineType="solid"/>
  </node>
  <node label="100153248" id="-220">
    <att type="string" name="canonicalName" value="100153248"/>
    <att type="list" name="cytoscape.alias.list">
      <att type="string" name="cytoscape.alias.list" value="100153248"/>
    </att>
    <att type="string" name="geneName" value="FGFR1"/>
    <att type="string" name="id" value="100153248"/>
    <graphics type="ELLIPSE" h="40.0" w="40.0" x="2484.972412109375" y="2738.523193359375" fill="#ccccff" width="1" outline="#666666" cy:nodeTransparency="1.0" cy:nodeLabelFont="SansSerif.bold-0-12" cy:nodeLabel="FGFR1" cy:borderLineType="solid"/>
  </node>
  <node label="100525250" id="-219">
    <att type="string" name="canonicalName" value="100525250"/>
    <att type="list" name="cytoscape.alias.list">
      <att type="string" name="cytoscape.alias.list" value="100525250"/>
    </att>
    <att type="string" name="geneName" value="LOC100525250"/>
    <att type="string" name="id" value="100525250"/>
    <graphics type="ELLIPSE" h="40.0" w="40.0" x="1801.262451171875" y="5666.68896484375" fill="#ccccff" width="1" outline="#666666" cy:nodeTransparency="1.0" cy:nodeLabelFont="SansSerif.bold-0-12" cy:nodeLabel="LOC100525250" cy:borderLineType="solid"/>
  </node>
  <node label="397020" id="-218">
    <att type="string" name="canonicalName" value="397020"/>
    <att type="list" name="cytoscape.alias.list">
      <att type="string" name="cytoscape.alias.list" value="397020"/>
    </att>
    <att type="string" name="geneName" value="TNFRSF1A"/>
    <att type="string" name="id" value="397020"/>
    <graphics type="ELLIPSE" h="40.0" w="40.0" x="1711.662841796875" y="6099.283203125" fill="#ccccff" width="1" outline="#666666" cy:nodeTransparency="1.0" cy:nodeLabelFont="SansSerif.bold-0-12" cy:nodeLabel="TNFRSF1A" cy:borderLineType="solid"/>
  </node>
  <node label="397244" id="-217">
    <att type="string" name="canonicalName" value="397244"/>
    <att type="list" name="cytoscape.alias.list">
      <att type="string" name="cytoscape.alias.list" value="397244"/>
    </att>
    <att type="string" name="geneName" value="CASP3"/>
    <att type="string" name="id" value="397244"/>
    <graphics type="ELLIPSE" h="40.0" w="40.0" x="1804.2093505859375" y="6040.93994140625" fill="#ccccff" width="1" outline="#666666" cy:nodeTransparency="1.0" cy:nodeLabelFont="SansSerif.bold-0-12" cy:nodeLabel="CASP3" cy:borderLineType="solid"/>
  </node>
  <node label="100517077" id="-216">
    <att type="string" name="canonicalName" value="100517077"/>
    <att type="list" name="cytoscape.alias.list">
      <att type="string" name="cytoscape.alias.list" value="100517077"/>
    </att>
    <att type="string" name="geneName" value="MKNK2"/>
    <att type="string" name="id" value="100517077"/>
    <graphics type="ELLIPSE" h="40.0" w="40.0" x="1584.100341796875" y="2084.836181640625" fill="#ccccff" width="1" outline="#666666" cy:nodeTransparency="1.0" cy:nodeLabelFont="SansSerif.bold-0-12" cy:nodeLabel="MKNK2" cy:borderLineType="solid"/>
  </node>
  <node label="100512983" id="-215">
    <att type="string" name="canonicalName" value="100512983"/>
    <att type="list" name="cytoscape.alias.list">
      <att type="string" name="cytoscape.alias.list" value="100512983"/>
    </att>
    <att type="string" name="geneName" value="LOC100512983"/>
    <att type="string" name="id" value="100512983"/>
    <graphics type="ELLIPSE" h="40.0" w="40.0" x="1752.1448974609375" y="1172.983154296875" fill="#ccccff" width="1" outline="#666666" cy:nodeTransparency="1.0" cy:nodeLabelFont="SansSerif.bold-0-12" cy:nodeLabel="LOC100512983" cy:borderLineType="solid"/>
  </node>
  <node label="100515414" id="-214">
    <att type="string" name="canonicalName" value="100515414"/>
    <att type="list" name="cytoscape.alias.list">
      <att type="string" name="cytoscape.alias.list" value="100515414"/>
    </att>
    <att type="string" name="geneName" value="RASA2"/>
    <att type="string" name="id" value="100515414"/>
    <graphics type="ELLIPSE" h="40.0" w="40.0" x="513.4561157226562" y="6573.18896484375" fill="#ccccff" width="1" outline="#666666" cy:nodeTransparency="1.0" cy:nodeLabelFont="SansSerif.bold-0-12" cy:nodeLabel="RASA2" cy:borderLineType="solid"/>
  </node>
  <node label="100739349" id="-213">
    <att type="string" name="canonicalName" value="100739349"/>
    <att type="list" name="cytoscape.alias.list">
      <att type="string" name="cytoscape.alias.list" value="100739349"/>
    </att>
    <att type="string" name="geneName" value="NRAS"/>
    <att type="string" name="id" value="100739349"/>
    <graphics type="ELLIPSE" h="40.0" w="40.0" x="510.4456787109375" y="6680.9111328125" fill="#ccccff" width="1" outline="#666666" cy:nodeTransparency="1.0" cy:nodeLabelFont="SansSerif.bold-0-12" cy:nodeLabel="NRAS" cy:borderLineType="solid"/>
  </node>
  <node label="100525387" id="-212">
    <att type="string" name="canonicalName" value="100525387"/>
    <att type="list" name="cytoscape.alias.list">
      <att type="string" name="cytoscape.alias.list" value="100525387"/>
    </att>
    <att type="string" name="geneName" value="CACNA1A"/>
    <att type="string" name="id" value="100525387"/>
    <graphics type="ELLIPSE" h="40.0" w="40.0" x="1676.7701416015625" y="5772.96826171875" fill="#ccccff" width="1" outline="#666666" cy:nodeTransparency="1.0" cy:nodeLabelFont="SansSerif.bold-0-12" cy:nodeLabel="CACNA1A" cy:borderLineType="solid"/>
  </node>
  <node label="100511890" id="-211">
    <att type="string" name="canonicalName" value="100511890"/>
    <att type="list" name="cytoscape.alias.list">
      <att type="string" name="cytoscape.alias.list" value="100511890"/>
    </att>
    <att type="string" name="geneName" value="HSPA8"/>
    <att type="string" name="id" value="100511890"/>
    <graphics type="ELLIPSE" h="40.0" w="40.0" x="1675.9945068359375" y="564.9315185546875" fill="#ccccff" width="1" outline="#666666" cy:nodeTransparency="1.0" cy:nodeLabelFont="SansSerif.bold-0-12" cy:nodeLabel="HSPA8" cy:borderLineType="solid"/>
  </node>
  <node label="100626904" id="-210">
    <att type="string" name="canonicalName" value="100626904"/>
    <att type="list" name="cytoscape.alias.list">
      <att type="string" name="cytoscape.alias.list" value="100626904"/>
    </att>
    <att type="string" name="geneName" value="LOC100626904"/>
    <att type="string" name="id" value="100626904"/>
    <graphics type="ELLIPSE" h="40.0" w="40.0" x="1895.2208251953125" y="5980.2080078125" fill="#ccccff" width="1" outline="#666666" cy:nodeTransparency="1.0" cy:nodeLabelFont="SansSerif.bold-0-12" cy:nodeLabel="LOC100626904" cy:borderLineType="solid"/>
  </node>
  <node label="100522018" id="-209">
    <att type="string" name="canonicalName" value="100522018"/>
    <att type="list" name="cytoscape.alias.list">
      <att type="string" name="cytoscape.alias.list" value="100522018"/>
    </att>
    <att type="string" name="geneName" value="GCLC"/>
    <att type="string" name="id" value="100522018"/>
    <graphics type="ELLIPSE" h="40.0" w="40.0" x="2741.899658203125" y="4242.4892578125" fill="#ccccff" width="1" outline="#666666" cy:nodeTransparency="1.0" cy:nodeLabelFont="SansSerif.bold-0-12" cy:nodeLabel="GCLC" cy:borderLineType="solid"/>
  </node>
  <node label="100152951" id="-208">
    <att type="string" name="canonicalName" value="100152951"/>
    <att type="list" name="cytoscape.alias.list">
      <att type="string" name="cytoscape.alias.list" value="100152951"/>
    </att>
    <att type="string" name="geneName" value="GSTA4"/>
    <att type="string" name="id" value="100152951"/>
    <graphics type="ELLIPSE" h="40.0" w="40.0" x="2490.337890625" y="3966.5341796875" fill="#ccccff" width="1" outline="#666666" cy:nodeTransparency="1.0" cy:nodeLabelFont="SansSerif.bold-0-12" cy:nodeLabel="GSTA4" cy:borderLineType="solid"/>
  </node>
  <node label="399537" id="-207">
    <att type="string" name="canonicalName" value="399537"/>
    <att type="list" name="cytoscape.alias.list">
      <att type="string" name="cytoscape.alias.list" value="399537"/>
    </att>
    <att type="string" name="geneName" value="GPX4"/>
    <att type="string" name="id" value="399537"/>
    <graphics type="ELLIPSE" h="40.0" w="40.0" x="2570.630615234375" y="3886.038330078125" fill="#ccccff" width="1" outline="#666666" cy:nodeTransparency="1.0" cy:nodeLabelFont="SansSerif.bold-0-12" cy:nodeLabel="GPX4" cy:borderLineType="solid"/>
  </node>
  <node label="397403" id="-206">
    <att type="string" name="canonicalName" value="397403"/>
    <att type="list" name="cytoscape.alias.list">
      <att type="string" name="cytoscape.alias.list" value="397403"/>
    </att>
    <att type="string" name="geneName" value="GPX1"/>
    <att type="string" name="id" value="397403"/>
    <graphics type="ELLIPSE" h="40.0" w="40.0" x="2390.073486328125" y="3836.492431640625" fill="#ccccff" width="1" outline="#666666" cy:nodeTransparency="1.0" cy:nodeLabelFont="SansSerif.bold-0-12" cy:nodeLabel="GPX1" cy:borderLineType="solid"/>
  </node>
  <node label="100514231" id="-205">
    <att type="string" name="canonicalName" value="100514231"/>
    <att type="list" name="cytoscape.alias.list">
      <att type="string" name="cytoscape.alias.list" value="100514231"/>
    </att>
    <att type="string" name="geneName" value="LOC100514231"/>
    <att type="string" name="id" value="100514231"/>
    <graphics type="ELLIPSE" h="40.0" w="40.0" x="2591.260498046875" y="3765.67236328125" fill="#ccccff" width="1" outline="#666666" cy:nodeTransparency="1.0" cy:nodeLabelFont="SansSerif.bold-0-12" cy:nodeLabel="LOC100514231" cy:borderLineType="solid"/>
  </node>
  <node label="780435" id="-204">
    <att type="string" name="canonicalName" value="780435"/>
    <att type="list" name="cytoscape.alias.list">
      <att type="string" name="cytoscape.alias.list" value="780435"/>
    </att>
    <att type="string" name="geneName" value="LOC780435"/>
    <att type="string" name="id" value="780435"/>
    <graphics type="ELLIPSE" h="40.0" w="40.0" x="2455.369873046875" y="3918.8173828125" fill="#ccccff" width="1" outline="#666666" cy:nodeTransparency="1.0" cy:nodeLabelFont="SansSerif.bold-0-12" cy:nodeLabel="LOC780435" cy:borderLineType="solid"/>
  </node>
  <node label="397520" id="-203">
    <att type="string" name="canonicalName" value="397520"/>
    <att type="list" name="cytoscape.alias.list">
      <att type="string" name="cytoscape.alias.list" value="397520"/>
    </att>
    <att type="string" name="geneName" value="ANPEP"/>
    <att type="string" name="id" value="397520"/>
    <graphics type="ELLIPSE" h="40.0" w="40.0" x="2649.456298828125" y="4165.2880859375" fill="#ccccff" width="1" outline="#666666" cy:nodeTransparency="1.0" cy:nodeLabelFont="SansSerif.bold-0-12" cy:nodeLabel="ANPEP" cy:borderLineType="solid"/>
  </node>
  <node label="396850" id="-202">
    <att type="string" name="canonicalName" value="396850"/>
    <att type="list" name="cytoscape.alias.list">
      <att type="string" name="cytoscape.alias.list" value="396850"/>
    </att>
    <att type="string" name="geneName" value="GSTA2"/>
    <att type="string" name="id" value="396850"/>
    <graphics type="ELLIPSE" h="40.0" w="40.0" x="2282.062744140625" y="3912.813232421875" fill="#ccccff" width="1" outline="#666666" cy:nodeTransparency="1.0" cy:nodeLabelFont="SansSerif.bold-0-12" cy:nodeLabel="GSTA2" cy:borderLineType="solid"/>
  </node>
  <node label="100152660" id="-201">
    <att type="string" name="canonicalName" value="100152660"/>
    <att type="list" name="cytoscape.alias.list">
      <att type="string" name="cytoscape.alias.list" value="100152660"/>
    </att>
    <att type="string" name="geneName" value="GSS"/>
    <att type="string" name="id" value="100152660"/>
    <graphics type="ELLIPSE" h="40.0" w="40.0" x="2469.91943359375" y="3730.111083984375" fill="#ccccff" width="1" outline="#666666" cy:nodeTransparency="1.0" cy:nodeLabelFont="SansSerif.bold-0-12" cy:nodeLabel="GSS" cy:borderLineType="solid"/>
  </node>
  <node label="396598" id="-200">
    <att type="string" name="canonicalName" value="396598"/>
    <att type="list" name="cytoscape.alias.list">
      <att type="string" name="cytoscape.alias.list" value="396598"/>
    </att>
    <att type="string" name="geneName" value="GPX3"/>
    <att type="string" name="id" value="396598"/>
    <graphics type="ELLIPSE" h="40.0" w="40.0" x="2463.489013671875" y="3835.62060546875" fill="#ccccff" width="1" outline="#666666" cy:nodeTransparency="1.0" cy:nodeLabelFont="SansSerif.bold-0-12" cy:nodeLabel="GPX3" cy:borderLineType="solid"/>
  </node>
  <node label="397095" id="-199">
    <att type="string" name="canonicalName" value="397095"/>
    <att type="list" name="cytoscape.alias.list">
      <att type="string" name="cytoscape.alias.list" value="397095"/>
    </att>
    <att type="string" name="geneName" value="GGT1"/>
    <att type="string" name="id" value="397095"/>
    <graphics type="ELLIPSE" h="40.0" w="40.0" x="2563.74609375" y="4074.60498046875" fill="#ccccff" width="1" outline="#666666" cy:nodeTransparency="1.0" cy:nodeLabelFont="SansSerif.bold-0-12" cy:nodeLabel="GGT1" cy:borderLineType="solid"/>
  </node>
  <node label="100517534" id="-198">
    <att type="string" name="canonicalName" value="100517534"/>
    <att type="list" name="cytoscape.alias.list">
      <att type="string" name="cytoscape.alias.list" value="100517534"/>
    </att>
    <att type="string" name="geneName" value="LOC100517534"/>
    <att type="string" name="id" value="100517534"/>
    <graphics type="ELLIPSE" h="40.0" w="40.0" x="2298.581787109375" y="3602.23876953125" fill="#ccccff" width="1" outline="#666666" cy:nodeTransparency="1.0" cy:nodeLabelFont="SansSerif.bold-0-12" cy:nodeLabel="LOC100517534" cy:borderLineType="solid"/>
  </node>
  <node label="100153094" id="-197">
    <att type="string" name="canonicalName" value="100153094"/>
    <att type="list" name="cytoscape.alias.list">
      <att type="string" name="cytoscape.alias.list" value="100153094"/>
    </att>
    <att type="string" name="geneName" value="GSTT1"/>
    <att type="string" name="id" value="100153094"/>
    <graphics type="ELLIPSE" h="40.0" w="40.0" x="2338.77685546875" y="3712.169677734375" fill="#ccccff" width="1" outline="#666666" cy:nodeTransparency="1.0" cy:nodeLabelFont="SansSerif.bold-0-12" cy:nodeLabel="GSTT1" cy:borderLineType="solid"/>
  </node>
  <node label="396625" id="-196">
    <att type="string" name="canonicalName" value="396625"/>
    <att type="list" name="cytoscape.alias.list">
      <att type="string" name="cytoscape.alias.list" value="396625"/>
    </att>
    <att type="string" name="geneName" value="GSR"/>
    <att type="string" name="id" value="396625"/>
    <graphics type="ELLIPSE" h="40.0" w="40.0" x="410.4457092285156" y="6573.18896484375" fill="#ccccff" width="1" outline="#666666" cy:nodeTransparency="1.0" cy:nodeLabelFont="SansSerif.bold-0-12" cy:nodeLabel="GSR" cy:borderLineType="solid"/>
  </node>
  <node label="100513365" id="-195">
    <att type="string" name="canonicalName" value="100513365"/>
    <att type="list" name="cytoscape.alias.list">
      <att type="string" name="cytoscape.alias.list" value="100513365"/>
    </att>
    <att type="string" name="geneName" value="LOC100513365"/>
    <att type="string" name="id" value="100513365"/>
    <graphics type="ELLIPSE" h="40.0" w="40.0" x="408.4066467285156" y="6680.93359375" fill="#ccccff" width="1" outline="#666666" cy:nodeTransparency="1.0" cy:nodeLabelFont="SansSerif.bold-0-12" cy:nodeLabel="LOC100513365" cy:borderLineType="solid"/>
  </node>
  <node label="733607" id="-194">
    <att type="string" name="canonicalName" value="733607"/>
    <att type="list" name="cytoscape.alias.list">
      <att type="string" name="cytoscape.alias.list" value="733607"/>
    </att>
    <att type="string" name="geneName" value="MGST3"/>
    <att type="string" name="id" value="733607"/>
    <graphics type="ELLIPSE" h="40.0" w="40.0" x="2504.658203125" y="3785.07421875" fill="#ccccff" width="1" outline="#666666" cy:nodeTransparency="1.0" cy:nodeLabelFont="SansSerif.bold-0-12" cy:nodeLabel="MGST3" cy:borderLineType="solid"/>
  </node>
  <node label="397117" id="-193">
    <att type="string" name="canonicalName" value="397117"/>
    <att type="list" name="cytoscape.alias.list">
      <att type="string" name="cytoscape.alias.list" value="397117"/>
    </att>
    <att type="string" name="geneName" value="GSTO1"/>
    <att type="string" name="id" value="397117"/>
    <graphics type="ELLIPSE" h="40.0" w="40.0" x="2272.84033203125" y="3803.045166015625" fill="#ccccff" width="1" outline="#666666" cy:nodeTransparency="1.0" cy:nodeLabelFont="SansSerif.bold-0-12" cy:nodeLabel="GSTO1" cy:borderLineType="solid"/>
  </node>
  <node label="100157523" id="-192">
    <att type="string" name="canonicalName" value="100157523"/>
    <att type="list" name="cytoscape.alias.list">
      <att type="string" name="cytoscape.alias.list" value="100157523"/>
    </att>
    <att type="string" name="geneName" value="GGT5"/>
    <att type="string" name="id" value="100157523"/>
    <graphics type="ELLIPSE" h="40.0" w="40.0" x="2174.853759765625" y="3961.09326171875" fill="#ccccff" width="1" outline="#666666" cy:nodeTransparency="1.0" cy:nodeLabelFont="SansSerif.bold-0-12" cy:nodeLabel="GGT5" cy:borderLineType="solid"/>
  </node>
  <node label="396898" id="-191">
    <att type="string" name="canonicalName" value="396898"/>
    <att type="list" name="cytoscape.alias.list">
      <att type="string" name="cytoscape.alias.list" value="396898"/>
    </att>
    <att type="string" name="geneName" value="ATP1B1"/>
    <att type="string" name="id" value="396898"/>
    <graphics type="ELLIPSE" h="40.0" w="40.0" x="2008.926025390625" y="1744.018310546875" fill="#ccccff" width="1" outline="#666666" cy:nodeTransparency="1.0" cy:nodeLabelFont="SansSerif.bold-0-12" cy:nodeLabel="ATP1B1" cy:borderLineType="solid"/>
  </node>
  <node label="396828" id="-190">
    <att type="string" name="canonicalName" value="396828"/>
    <att type="list" name="cytoscape.alias.list">
      <att type="string" name="cytoscape.alias.list" value="396828"/>
    </att>
    <att type="string" name="geneName" value="ATP1A2"/>
    <att type="string" name="id" value="396828"/>
    <graphics type="ELLIPSE" h="40.0" w="40.0" x="2252.33740234375" y="1737.5595703125" fill="#ccccff" width="1" outline="#666666" cy:nodeTransparency="1.0" cy:nodeLabelFont="SansSerif.bold-0-12" cy:nodeLabel="ATP1A2" cy:borderLineType="solid"/>
  </node>
  <node label="100157711" id="-189">
    <att type="string" name="canonicalName" value="100157711"/>
    <att type="list" name="cytoscape.alias.list">
      <att type="string" name="cytoscape.alias.list" value="100157711"/>
    </att>
    <att type="string" name="geneName" value="ATP1A4"/>
    <att type="string" name="id" value="100157711"/>
    <graphics type="ELLIPSE" h="40.0" w="40.0" x="2072.421630859375" y="1519.340087890625" fill="#ccccff" width="1" outline="#666666" cy:nodeTransparency="1.0" cy:nodeLabelFont="SansSerif.bold-0-12" cy:nodeLabel="ATP1A4" cy:borderLineType="solid"/>
  </node>
  <node label="100525120" id="-188">
    <att type="string" name="canonicalName" value="100525120"/>
    <att type="list" name="cytoscape.alias.list">
      <att type="string" name="cytoscape.alias.list" value="100525120"/>
    </att>
    <att type="string" name="geneName" value="LOC100525120"/>
    <att type="string" name="id" value="100525120"/>
    <graphics type="ELLIPSE" h="40.0" w="40.0" x="2380.090087890625" y="2490.76220703125" fill="#ccccff" width="1" outline="#666666" cy:nodeTransparency="1.0" cy:nodeLabelFont="SansSerif.bold-0-12" cy:nodeLabel="LOC100525120" cy:borderLineType="solid"/>
  </node>
  <node label="396848" id="-187">
    <att type="string" name="canonicalName" value="396848"/>
    <att type="list" name="cytoscape.alias.list">
      <att type="string" name="cytoscape.alias.list" value="396848"/>
    </att>
    <att type="string" name="geneName" value="MYLK"/>
    <att type="string" name="id" value="396848"/>
    <graphics type="ELLIPSE" h="40.0" w="40.0" x="308.4066467285156" y="6573.18896484375" fill="#ccccff" width="1" outline="#666666" cy:nodeTransparency="1.0" cy:nodeLabelFont="SansSerif.bold-0-12" cy:nodeLabel="MYLK" cy:borderLineType="solid"/>
  </node>
  <node label="100627936" id="-186">
    <att type="string" name="canonicalName" value="100627936"/>
    <att type="list" name="cytoscape.alias.list">
      <att type="string" name="cytoscape.alias.list" value="100627936"/>
    </att>
    <att type="string" name="geneName" value="PAK4"/>
    <att type="string" name="id" value="100627936"/>
    <graphics type="ELLIPSE" h="40.0" w="40.0" x="305.35601806640625" y="6680.91015625" fill="#ccccff" width="1" outline="#666666" cy:nodeTransparency="1.0" cy:nodeLabelFont="SansSerif.bold-0-12" cy:nodeLabel="PAK4" cy:borderLineType="solid"/>
  </node>
  <node label="397063" id="-185">
    <att type="string" name="canonicalName" value="397063"/>
    <att type="list" name="cytoscape.alias.list">
      <att type="string" name="cytoscape.alias.list" value="397063"/>
    </att>
    <att type="string" name="geneName" value="ITGB3"/>
    <att type="string" name="id" value="397063"/>
    <graphics type="ELLIPSE" h="40.0" w="40.0" x="205.35601806640625" y="6573.18896484375" fill="#ccccff" width="1" outline="#666666" cy:nodeTransparency="1.0" cy:nodeLabelFont="SansSerif.bold-0-12" cy:nodeLabel="ITGB3" cy:borderLineType="solid"/>
  </node>
  <node label="404693" id="-184">
    <att type="string" name="canonicalName" value="404693"/>
    <att type="list" name="cytoscape.alias.list">
      <att type="string" name="cytoscape.alias.list" value="404693"/>
    </att>
    <att type="string" name="geneName" value="CAV1"/>
    <att type="string" name="id" value="404693"/>
    <graphics type="ELLIPSE" h="40.0" w="40.0" x="203.31698608398438" y="6680.93359375" fill="#ccccff" width="1" outline="#666666" cy:nodeTransparency="1.0" cy:nodeLabelFont="SansSerif.bold-0-12" cy:nodeLabel="CAV1" cy:borderLineType="solid"/>
  </node>
  <node label="100518536" id="-183">
    <att type="string" name="canonicalName" value="100518536"/>
    <att type="list" name="cytoscape.alias.list">
      <att type="string" name="cytoscape.alias.list" value="100518536"/>
    </att>
    <att type="string" name="geneName" value="LOC100518536"/>
    <att type="string" name="id" value="100518536"/>
    <graphics type="ELLIPSE" h="40.0" w="40.0" x="1609.599365234375" y="1238.24462890625" fill="#ccccff" width="1" outline="#666666" cy:nodeTransparency="1.0" cy:nodeLabelFont="SansSerif.bold-0-12" cy:nodeLabel="LOC100518536" cy:borderLineType="solid"/>
  </node>
  <node label="100049703" id="-182">
    <att type="string" name="canonicalName" value="100049703"/>
    <att type="list" name="cytoscape.alias.list">
      <att type="string" name="cytoscape.alias.list" value="100049703"/>
    </att>
    <att type="string" name="geneName" value="BCL2"/>
    <att type="string" name="id" value="100049703"/>
    <graphics type="ELLIPSE" h="40.0" w="40.0" x="1478.6748046875" y="1204.342529296875" fill="#ccccff" width="1" outline="#666666" cy:nodeTransparency="1.0" cy:nodeLabelFont="SansSerif.bold-0-12" cy:nodeLabel="BCL2" cy:borderLineType="solid"/>
  </node>
  <node label="100154420" id="-181">
    <att type="string" name="canonicalName" value="100154420"/>
    <att type="list" name="cytoscape.alias.list">
      <att type="string" name="cytoscape.alias.list" value="100154420"/>
    </att>
    <att type="string" name="geneName" value="LAMA2"/>
    <att type="string" name="id" value="100154420"/>
    <graphics type="ELLIPSE" h="40.0" w="40.0" x="1694.188720703125" y="1204.42919921875" fill="#ccccff" width="1" outline="#666666" cy:nodeTransparency="1.0" cy:nodeLabelFont="SansSerif.bold-0-12" cy:nodeLabel="LAMA2" cy:borderLineType="solid"/>
  </node>
  <node label="396763" id="-180">
    <att type="string" name="canonicalName" value="396763"/>
    <att type="list" name="cytoscape.alias.list">
      <att type="string" name="cytoscape.alias.list" value="396763"/>
    </att>
    <att type="string" name="geneName" value="FLT1"/>
    <att type="string" name="id" value="396763"/>
    <graphics type="ELLIPSE" h="40.0" w="40.0" x="2328.424072265625" y="2783.1552734375" fill="#ccccff" width="1" outline="#666666" cy:nodeTransparency="1.0" cy:nodeLabelFont="SansSerif.bold-0-12" cy:nodeLabel="FLT1" cy:borderLineType="solid"/>
  </node>
  <node label="733578" id="-179">
    <att type="string" name="canonicalName" value="733578"/>
    <att type="list" name="cytoscape.alias.list">
      <att type="string" name="cytoscape.alias.list" value="733578"/>
    </att>
    <att type="string" name="geneName" value="CLDN4"/>
    <att type="string" name="id" value="733578"/>
    <graphics type="ELLIPSE" h="40.0" w="40.0" x="1981.9051513671875" y="4029.896240234375" fill="#ccccff" width="1" outline="#666666" cy:nodeTransparency="1.0" cy:nodeLabelFont="SansSerif.bold-0-12" cy:nodeLabel="CLDN4" cy:borderLineType="solid"/>
  </node>
  <node label="100302016" id="-178">
    <att type="string" name="canonicalName" value="100302016"/>
    <att type="list" name="cytoscape.alias.list">
      <att type="string" name="cytoscape.alias.list" value="100302016"/>
    </att>
    <att type="string" name="geneName" value="CLDN11"/>
    <att type="string" name="id" value="100302016"/>
    <graphics type="ELLIPSE" h="40.0" w="40.0" x="2074.853759765625" y="4096.74072265625" fill="#ccccff" width="1" outline="#666666" cy:nodeTransparency="1.0" cy:nodeLabelFont="SansSerif.bold-0-12" cy:nodeLabel="CLDN11" cy:borderLineType="solid"/>
  </node>
  <node label="414412" id="-177">
    <att type="string" name="canonicalName" value="414412"/>
    <att type="list" name="cytoscape.alias.list">
      <att type="string" name="cytoscape.alias.list" value="414412"/>
    </att>
    <att type="string" name="geneName" value="SDHB"/>
    <att type="string" name="id" value="414412"/>
    <graphics type="ELLIPSE" h="40.0" w="40.0" x="2899.21533203125" y="842.4429931640625" fill="#ccccff" width="1" outline="#666666" cy:nodeTransparency="1.0" cy:nodeLabelFont="SansSerif.bold-0-12" cy:nodeLabel="SDHB" cy:borderLineType="solid"/>
  </node>
  <node label="100627128" id="-176">
    <att type="string" name="canonicalName" value="100627128"/>
    <att type="list" name="cytoscape.alias.list">
      <att type="string" name="cytoscape.alias.list" value="100627128"/>
    </att>
    <att type="string" name="geneName" value="FH"/>
    <att type="string" name="id" value="100627128"/>
    <graphics type="ELLIPSE" h="40.0" w="40.0" x="2802.197265625" y="926.9814453125" fill="#ccccff" width="1" outline="#666666" cy:nodeTransparency="1.0" cy:nodeLabelFont="SansSerif.bold-0-12" cy:nodeLabel="FH" cy:borderLineType="solid"/>
  </node>
  <node label="100628006" id="-175">
    <att type="string" name="canonicalName" value="100628006"/>
    <att type="list" name="cytoscape.alias.list">
      <att type="string" name="cytoscape.alias.list" value="100628006"/>
    </att>
    <att type="string" name="geneName" value="ACO1"/>
    <att type="string" name="id" value="100628006"/>
    <graphics type="ELLIPSE" h="40.0" w="40.0" x="2878.648681640625" y="1042.3101806640625" fill="#ccccff" width="1" outline="#666666" cy:nodeTransparency="1.0" cy:nodeLabelFont="SansSerif.bold-0-12" cy:nodeLabel="ACO1" cy:borderLineType="solid"/>
  </node>
  <node label="100125957" id="-174">
    <att type="string" name="canonicalName" value="100125957"/>
    <att type="list" name="cytoscape.alias.list">
      <att type="string" name="cytoscape.alias.list" value="100125957"/>
    </att>
    <att type="string" name="geneName" value="ACLY"/>
    <att type="string" name="id" value="100125957"/>
    <graphics type="ELLIPSE" h="40.0" w="40.0" x="2775.218994140625" y="1128.824462890625" fill="#ccccff" width="1" outline="#666666" cy:nodeTransparency="1.0" cy:nodeLabelFont="SansSerif.bold-0-12" cy:nodeLabel="ACLY" cy:borderLineType="solid"/>
  </node>
  <node label="403165" id="-173">
    <att type="string" name="canonicalName" value="403165"/>
    <att type="list" name="cytoscape.alias.list">
      <att type="string" name="cytoscape.alias.list" value="403165"/>
    </att>
    <att type="string" name="geneName" value="PCK2"/>
    <att type="string" name="id" value="403165"/>
    <graphics type="ELLIPSE" h="40.0" w="40.0" x="2928.73095703125" y="1170.605712890625" fill="#ccccff" width="1" outline="#666666" cy:nodeTransparency="1.0" cy:nodeLabelFont="SansSerif.bold-0-12" cy:nodeLabel="PCK2" cy:borderLineType="solid"/>
  </node>
  <node label="397690" id="-172">
    <att type="string" name="canonicalName" value="397690"/>
    <att type="list" name="cytoscape.alias.list">
      <att type="string" name="cytoscape.alias.list" value="397690"/>
    </att>
    <att type="string" name="geneName" value="DLST"/>
    <att type="string" name="id" value="397690"/>
    <graphics type="ELLIPSE" h="40.0" w="40.0" x="3127.45361328125" y="1223.843505859375" fill="#ccccff" width="1" outline="#666666" cy:nodeTransparency="1.0" cy:nodeLabelFont="SansSerif.bold-0-12" cy:nodeLabel="DLST" cy:borderLineType="solid"/>
  </node>
  <node label="100514142" id="-171">
    <att type="string" name="canonicalName" value="100514142"/>
    <att type="list" name="cytoscape.alias.list">
      <att type="string" name="cytoscape.alias.list" value="100514142"/>
    </att>
    <att type="string" name="geneName" value="GCK"/>
    <att type="string" name="id" value="100514142"/>
    <graphics type="ELLIPSE" h="40.0" w="40.0" x="1611.662841796875" y="5980.2080078125" fill="#ccccff" width="1" outline="#666666" cy:nodeTransparency="1.0" cy:nodeLabelFont="SansSerif.bold-0-12" cy:nodeLabel="GCK" cy:borderLineType="solid"/>
  </node>
  <node label="407608" id="-170">
    <att type="string" name="canonicalName" value="407608"/>
    <att type="list" name="cytoscape.alias.list">
      <att type="string" name="cytoscape.alias.list" value="407608"/>
    </att>
    <att type="string" name="geneName" value="PGK1"/>
    <att type="string" name="id" value="407608"/>
    <graphics type="ELLIPSE" h="40.0" w="40.0" x="103.31697845458984" y="6573.18896484375" fill="#ccccff" width="1" outline="#666666" cy:nodeTransparency="1.0" cy:nodeLabelFont="SansSerif.bold-0-12" cy:nodeLabel="PGK1" cy:borderLineType="solid"/>
  </node>
  <node label="100517097" id="-169">
    <att type="string" name="canonicalName" value="100517097"/>
    <att type="list" name="cytoscape.alias.list">
      <att type="string" name="cytoscape.alias.list" value="100517097"/>
    </att>
    <att type="string" name="geneName" value="LOC100517097"/>
    <att type="string" name="id" value="100517097"/>
    <graphics type="ELLIPSE" h="40.0" w="40.0" x="100.99539184570312" y="6680.92822265625" fill="#ccccff" width="1" outline="#666666" cy:nodeTransparency="1.0" cy:nodeLabelFont="SansSerif.bold-0-12" cy:nodeLabel="LOC100517097" cy:borderLineType="solid"/>
  </node>
  <node label="100153520" id="-168">
    <att type="string" name="canonicalName" value="100153520"/>
    <att type="list" name="cytoscape.alias.list">
      <att type="string" name="cytoscape.alias.list" value="100153520"/>
    </att>
    <att type="string" name="geneName" value="HKDC1"/>
    <att type="string" name="id" value="100153520"/>
    <graphics type="ELLIPSE" h="40.0" w="40.0" x="2470.465087890625" y="5151.59912109375" fill="#ccccff" width="1" outline="#666666" cy:nodeTransparency="1.0" cy:nodeLabelFont="SansSerif.bold-0-12" cy:nodeLabel="HKDC1" cy:borderLineType="solid"/>
  </node>
  <node label="399536" id="-167">
    <att type="string" name="canonicalName" value="399536"/>
    <att type="list" name="cytoscape.alias.list">
      <att type="string" name="cytoscape.alias.list" value="399536"/>
    </att>
    <att type="string" name="geneName" value="GALM"/>
    <att type="string" name="id" value="399536"/>
    <graphics type="ELLIPSE" h="40.0" w="40.0" x="2451.859375" y="5041.8154296875" fill="#ccccff" width="1" outline="#666666" cy:nodeTransparency="1.0" cy:nodeLabelFont="SansSerif.bold-0-12" cy:nodeLabel="GALM" cy:borderLineType="solid"/>
  </node>
  <node label="733601" id="-166">
    <att type="string" name="canonicalName" value="733601"/>
    <att type="list" name="cytoscape.alias.list">
      <att type="string" name="cytoscape.alias.list" value="733601"/>
    </att>
    <att type="string" name="geneName" value="PFKM"/>
    <att type="string" name="id" value="733601"/>
    <graphics type="ELLIPSE" h="40.0" w="40.0" x="0.0" y="6573.18896484375" fill="#ccccff" width="1" outline="#666666" cy:nodeTransparency="1.0" cy:nodeLabelFont="SansSerif.bold-0-12" cy:nodeLabel="PFKM" cy:borderLineType="solid"/>
  </node>
  <node label="100512013" id="-165">
    <att type="string" name="canonicalName" value="100512013"/>
    <att type="list" name="cytoscape.alias.list">
      <att type="string" name="cytoscape.alias.list" value="100512013"/>
    </att>
    <att type="string" name="geneName" value="ALDOC"/>
    <att type="string" name="id" value="100512013"/>
    <graphics type="ELLIPSE" h="40.0" w="40.0" x="0.9953880310058594" y="6680.9482421875" fill="#ccccff" width="1" outline="#666666" cy:nodeTransparency="1.0" cy:nodeLabelFont="SansSerif.bold-0-12" cy:nodeLabel="ALDOC" cy:borderLineType="solid"/>
  </node>
  <node label="494561" id="-164">
    <att type="string" name="canonicalName" value="494561"/>
    <att type="list" name="cytoscape.alias.list">
      <att type="string" name="cytoscape.alias.list" value="494561"/>
    </att>
    <att type="string" name="geneName" value="HK2"/>
    <att type="string" name="id" value="494561"/>
    <graphics type="ELLIPSE" h="40.0" w="40.0" x="2403.417724609375" y="4943.29736328125" fill="#ccccff" width="1" outline="#666666" cy:nodeTransparency="1.0" cy:nodeLabelFont="SansSerif.bold-0-12" cy:nodeLabel="HK2" cy:borderLineType="solid"/>
  </node>
  <node label="397104" id="-163">
    <att type="string" name="canonicalName" value="397104"/>
    <att type="list" name="cytoscape.alias.list">
      <att type="string" name="cytoscape.alias.list" value="397104"/>
    </att>
    <att type="string" name="geneName" value="ACADM"/>
    <att type="string" name="id" value="397104"/>
    <graphics type="ELLIPSE" h="40.0" w="40.0" x="129.39453125" y="3796.7568359375" fill="#ccccff" width="1" outline="#666666" cy:nodeTransparency="1.0" cy:nodeLabelFont="SansSerif.bold-0-12" cy:nodeLabel="ACADM" cy:borderLineType="solid"/>
  </node>
  <node label="100516418" id="-162">
    <att type="string" name="canonicalName" value="100516418"/>
    <att type="list" name="cytoscape.alias.list">
      <att type="string" name="cytoscape.alias.list" value="100516418"/>
    </att>
    <att type="string" name="geneName" value="ACSBG2"/>
    <att type="string" name="id" value="100516418"/>
    <graphics type="ELLIPSE" h="40.0" w="40.0" x="23.04449462890625" y="3728.3251953125" fill="#ccccff" width="1" outline="#666666" cy:nodeTransparency="1.0" cy:nodeLabelFont="SansSerif.bold-0-12" cy:nodeLabel="ACSBG2" cy:borderLineType="solid"/>
  </node>
  <node label="100233169" id="-161">
    <att type="string" name="canonicalName" value="100233169"/>
    <att type="list" name="cytoscape.alias.list">
      <att type="string" name="cytoscape.alias.list" value="100233169"/>
    </att>
    <att type="string" name="geneName" value="ACSL3"/>
    <att type="string" name="id" value="100233169"/>
    <graphics type="ELLIPSE" h="40.0" w="40.0" x="2718.89501953125" y="6279.349609375" fill="#ccccff" width="1" outline="#666666" cy:nodeTransparency="1.0" cy:nodeLabelFont="SansSerif.bold-0-12" cy:nodeLabel="ACSL3" cy:borderLineType="solid"/>
  </node>
  <node label="396931" id="-160">
    <att type="string" name="canonicalName" value="396931"/>
    <att type="list" name="cytoscape.alias.list">
      <att type="string" name="cytoscape.alias.list" value="396931"/>
    </att>
    <att type="string" name="geneName" value="ACADL"/>
    <att type="string" name="id" value="396931"/>
    <graphics type="ELLIPSE" h="40.0" w="40.0" x="2716.098388671875" y="6387.07763671875" fill="#ccccff" width="1" outline="#666666" cy:nodeTransparency="1.0" cy:nodeLabelFont="SansSerif.bold-0-12" cy:nodeLabel="ACADL" cy:borderLineType="solid"/>
  </node>
  <node label="100113422" id="-159">
    <att type="string" name="canonicalName" value="100113422"/>
    <att type="list" name="cytoscape.alias.list">
      <att type="string" name="cytoscape.alias.list" value="100113422"/>
    </att>
    <att type="string" name="geneName" value="ACOX1"/>
    <att type="string" name="id" value="100113422"/>
    <graphics type="ELLIPSE" h="40.0" w="40.0" x="401.9775695800781" y="3915.899169921875" fill="#ccccff" width="1" outline="#666666" cy:nodeTransparency="1.0" cy:nodeLabelFont="SansSerif.bold-0-12" cy:nodeLabel="ACOX1" cy:borderLineType="solid"/>
  </node>
  <node label="100157521" id="-158">
    <att type="string" name="canonicalName" value="100157521"/>
    <att type="list" name="cytoscape.alias.list">
      <att type="string" name="cytoscape.alias.list" value="100157521"/>
    </att>
    <att type="string" name="geneName" value="ACSL5"/>
    <att type="string" name="id" value="100157521"/>
    <graphics type="ELLIPSE" h="40.0" w="40.0" x="527.7803344726562" y="3945.197265625" fill="#ccccff" width="1" outline="#666666" cy:nodeTransparency="1.0" cy:nodeLabelFont="SansSerif.bold-0-12" cy:nodeLabel="ACSL5" cy:borderLineType="solid"/>
  </node>
  <node label="100519491" id="-157">
    <att type="string" name="canonicalName" value="100519491"/>
    <att type="list" name="cytoscape.alias.list">
      <att type="string" name="cytoscape.alias.list" value="100519491"/>
    </att>
    <att type="string" name="geneName" value="CPT2"/>
    <att type="string" name="id" value="100519491"/>
    <graphics type="ELLIPSE" h="40.0" w="40.0" x="464.3262939453125" y="4021.11669921875" fill="#ccccff" width="1" outline="#666666" cy:nodeTransparency="1.0" cy:nodeLabelFont="SansSerif.bold-0-12" cy:nodeLabel="CPT2" cy:borderLineType="solid"/>
  </node>
  <node label="100157630" id="-156">
    <att type="string" name="canonicalName" value="100157630"/>
    <att type="list" name="cytoscape.alias.list">
      <att type="string" name="cytoscape.alias.list" value="100157630"/>
    </att>
    <att type="string" name="geneName" value="TPMT"/>
    <att type="string" name="id" value="100157630"/>
    <graphics type="ELLIPSE" h="40.0" w="40.0" x="1544.419921875" y="1516.310791015625" fill="#ccccff" width="1" outline="#666666" cy:nodeTransparency="1.0" cy:nodeLabelFont="SansSerif.bold-0-12" cy:nodeLabel="TPMT" cy:borderLineType="solid"/>
  </node>
  <node label="100517006" id="-155">
    <att type="string" name="canonicalName" value="100517006"/>
    <att type="list" name="cytoscape.alias.list">
      <att type="string" name="cytoscape.alias.list" value="100517006"/>
    </att>
    <att type="string" name="geneName" value="LOC100517006"/>
    <att type="string" name="id" value="100517006"/>
    <graphics type="ELLIPSE" h="40.0" w="40.0" x="2899.538330078125" y="2179.388671875" fill="#ccccff" width="1" outline="#666666" cy:nodeTransparency="1.0" cy:nodeLabelFont="SansSerif.bold-0-12" cy:nodeLabel="LOC100517006" cy:borderLineType="solid"/>
  </node>
  <node label="397136" id="-154">
    <att type="string" name="canonicalName" value="397136"/>
    <att type="list" name="cytoscape.alias.list">
      <att type="string" name="cytoscape.alias.list" value="397136"/>
    </att>
    <att type="string" name="geneName" value="PPP2CB"/>
    <att type="string" name="id" value="397136"/>
    <graphics type="ELLIPSE" h="40.0" w="40.0" x="2980.46435546875" y="2065.029052734375" fill="#ccccff" width="1" outline="#666666" cy:nodeTransparency="1.0" cy:nodeLabelFont="SansSerif.bold-0-12" cy:nodeLabel="PPP2CB" cy:borderLineType="solid"/>
  </node>
  <node label="100621326" id="-153">
    <att type="string" name="canonicalName" value="100621326"/>
    <att type="list" name="cytoscape.alias.list">
      <att type="string" name="cytoscape.alias.list" value="100621326"/>
    </att>
    <att type="string" name="geneName" value="LOC100621326"/>
    <att type="string" name="id" value="100621326"/>
    <graphics type="ELLIPSE" h="40.0" w="40.0" x="3040.243896484375" y="2127.94140625" fill="#ccccff" width="1" outline="#666666" cy:nodeTransparency="1.0" cy:nodeLabelFont="SansSerif.bold-0-12" cy:nodeLabel="LOC100621326" cy:borderLineType="solid"/>
  </node>
  <node label="100522059" id="-152">
    <att type="string" name="canonicalName" value="100522059"/>
    <att type="list" name="cytoscape.alias.list">
      <att type="string" name="cytoscape.alias.list" value="100522059"/>
    </att>
    <att type="string" name="geneName" value="LOC100522059"/>
    <att type="string" name="id" value="100522059"/>
    <graphics type="ELLIPSE" h="40.0" w="40.0" x="2616.098388671875" y="6279.349609375" fill="#ccccff" width="1" outline="#666666" cy:nodeTransparency="1.0" cy:nodeLabelFont="SansSerif.bold-0-12" cy:nodeLabel="LOC100522059" cy:borderLineType="solid"/>
  </node>
  <node label="100152635" id="-151">
    <att type="string" name="canonicalName" value="100152635"/>
    <att type="list" name="cytoscape.alias.list">
      <att type="string" name="cytoscape.alias.list" value="100152635"/>
    </att>
    <att type="string" name="geneName" value="MPP5"/>
    <att type="string" name="id" value="100152635"/>
    <graphics type="ELLIPSE" h="40.0" w="40.0" x="2612.878173828125" y="6387.06591796875" fill="#ccccff" width="1" outline="#666666" cy:nodeTransparency="1.0" cy:nodeLabelFont="SansSerif.bold-0-12" cy:nodeLabel="MPP5" cy:borderLineType="solid"/>
  </node>
  <node label="396997" id="-150">
    <att type="string" name="canonicalName" value="396997"/>
    <att type="list" name="cytoscape.alias.list">
      <att type="string" name="cytoscape.alias.list" value="396997"/>
    </att>
    <att type="string" name="geneName" value="CLDN5"/>
    <att type="string" name="id" value="396997"/>
    <graphics type="ELLIPSE" h="40.0" w="40.0" x="2009.1025390625" y="3898.724853515625" fill="#ccccff" width="1" outline="#666666" cy:nodeTransparency="1.0" cy:nodeLabelFont="SansSerif.bold-0-12" cy:nodeLabel="CLDN5" cy:borderLineType="solid"/>
  </node>
  <node label="396567" id="-149">
    <att type="string" name="canonicalName" value="396567"/>
    <att type="list" name="cytoscape.alias.list">
      <att type="string" name="cytoscape.alias.list" value="396567"/>
    </att>
    <att type="string" name="geneName" value="ZO1"/>
    <att type="string" name="id" value="396567"/>
    <graphics type="ELLIPSE" h="40.0" w="40.0" x="1899.234375" y="3937.995849609375" fill="#ccccff" width="1" outline="#666666" cy:nodeTransparency="1.0" cy:nodeLabelFont="SansSerif.bold-0-12" cy:nodeLabel="ZO1" cy:borderLineType="solid"/>
  </node>
  <node label="100738557" id="-148">
    <att type="string" name="canonicalName" value="100738557"/>
    <att type="list" name="cytoscape.alias.list">
      <att type="string" name="cytoscape.alias.list" value="100738557"/>
    </att>
    <att type="string" name="geneName" value="LOC100738557"/>
    <att type="string" name="id" value="100738557"/>
    <graphics type="ELLIPSE" h="40.0" w="40.0" x="2512.878173828125" y="6279.349609375" fill="#ccccff" width="1" outline="#666666" cy:nodeTransparency="1.0" cy:nodeLabelFont="SansSerif.bold-0-12" cy:nodeLabel="LOC100738557" cy:borderLineType="solid"/>
  </node>
  <node label="100625166" id="-147">
    <att type="string" name="canonicalName" value="100625166"/>
    <att type="list" name="cytoscape.alias.list">
      <att type="string" name="cytoscape.alias.list" value="100625166"/>
    </att>
    <att type="string" name="geneName" value="CLDN1"/>
    <att type="string" name="id" value="100625166"/>
    <graphics type="ELLIPSE" h="40.0" w="40.0" x="2509.65771484375" y="6387.06591796875" fill="#ccccff" width="1" outline="#666666" cy:nodeTransparency="1.0" cy:nodeLabelFont="SansSerif.bold-0-12" cy:nodeLabel="CLDN1" cy:borderLineType="solid"/>
  </node>
  <node label="100523778" id="-146">
    <att type="string" name="canonicalName" value="100523778"/>
    <att type="list" name="cytoscape.alias.list">
      <att type="string" name="cytoscape.alias.list" value="100523778"/>
    </att>
    <att type="string" name="geneName" value="CTNNA1"/>
    <att type="string" name="id" value="100523778"/>
    <graphics type="ELLIPSE" h="40.0" w="40.0" x="1708.244140625" y="4021.54736328125" fill="#ccccff" width="1" outline="#666666" cy:nodeTransparency="1.0" cy:nodeLabelFont="SansSerif.bold-0-12" cy:nodeLabel="CTNNA1" cy:borderLineType="solid"/>
  </node>
  <node label="100513065" id="-145">
    <att type="string" name="canonicalName" value="100513065"/>
    <att type="list" name="cytoscape.alias.list">
      <att type="string" name="cytoscape.alias.list" value="100513065"/>
    </att>
    <att type="string" name="geneName" value="TJP2"/>
    <att type="string" name="id" value="100513065"/>
    <graphics type="ELLIPSE" h="40.0" w="40.0" x="1699.1732177734375" y="4137.24853515625" fill="#ccccff" width="1" outline="#666666" cy:nodeTransparency="1.0" cy:nodeLabelFont="SansSerif.bold-0-12" cy:nodeLabel="TJP2" cy:borderLineType="solid"/>
  </node>
  <node label="414396" id="-144">
    <att type="string" name="canonicalName" value="414396"/>
    <att type="list" name="cytoscape.alias.list">
      <att type="string" name="cytoscape.alias.list" value="414396"/>
    </att>
    <att type="string" name="geneName" value="ACTB"/>
    <att type="string" name="id" value="414396"/>
    <graphics type="ELLIPSE" h="40.0" w="40.0" x="1772.4326171875" y="3881.20849609375" fill="#ccccff" width="1" outline="#666666" cy:nodeTransparency="1.0" cy:nodeLabelFont="SansSerif.bold-0-12" cy:nodeLabel="ACTB" cy:borderLineType="solid"/>
  </node>
  <node label="100157760" id="-143">
    <att type="string" name="canonicalName" value="100157760"/>
    <att type="list" name="cytoscape.alias.list">
      <att type="string" name="cytoscape.alias.list" value="100157760"/>
    </att>
    <att type="string" name="geneName" value="MYL9"/>
    <att type="string" name="id" value="100157760"/>
    <graphics type="ELLIPSE" h="40.0" w="40.0" x="1493.32470703125" y="3817.670654296875" fill="#ccccff" width="1" outline="#666666" cy:nodeTransparency="1.0" cy:nodeLabelFont="SansSerif.bold-0-12" cy:nodeLabel="MYL9" cy:borderLineType="solid"/>
  </node>
  <node label="733637" id="-142">
    <att type="string" name="canonicalName" value="733637"/>
    <att type="list" name="cytoscape.alias.list">
      <att type="string" name="cytoscape.alias.list" value="733637"/>
    </att>
    <att type="string" name="geneName" value="LOC733637"/>
    <att type="string" name="id" value="733637"/>
    <graphics type="ELLIPSE" h="40.0" w="40.0" x="1512.25" y="3901.0361328125" fill="#ccccff" width="1" outline="#666666" cy:nodeTransparency="1.0" cy:nodeLabelFont="SansSerif.bold-0-12" cy:nodeLabel="LOC733637" cy:borderLineType="solid"/>
  </node>
  <node label="397653" id="-141">
    <att type="string" name="canonicalName" value="397653"/>
    <att type="list" name="cytoscape.alias.list">
      <att type="string" name="cytoscape.alias.list" value="397653"/>
    </att>
    <att type="string" name="geneName" value="ACTB"/>
    <att type="string" name="id" value="397653"/>
    <graphics type="ELLIPSE" h="40.0" w="40.0" x="1713.0601806640625" y="3892.37353515625" fill="#ccccff" width="1" outline="#666666" cy:nodeTransparency="1.0" cy:nodeLabelFont="SansSerif.bold-0-12" cy:nodeLabel="ACTB" cy:borderLineType="solid"/>
  </node>
  <node label="100152637" id="-140">
    <att type="string" name="canonicalName" value="100152637"/>
    <att type="list" name="cytoscape.alias.list">
      <att type="string" name="cytoscape.alias.list" value="100152637"/>
    </att>
    <att type="string" name="geneName" value="PKC"/>
    <att type="string" name="id" value="100152637"/>
    <graphics type="ELLIPSE" h="40.0" w="40.0" x="1813.243896484375" y="3790.276611328125" fill="#ccccff" width="1" outline="#666666" cy:nodeTransparency="1.0" cy:nodeLabelFont="SansSerif.bold-0-12" cy:nodeLabel="PKC" cy:borderLineType="solid"/>
  </node>
  <node label="100127138" id="-139">
    <att type="string" name="canonicalName" value="100127138"/>
    <att type="list" name="cytoscape.alias.list">
      <att type="string" name="cytoscape.alias.list" value="100127138"/>
    </att>
    <att type="string" name="geneName" value="F11R"/>
    <att type="string" name="id" value="100127138"/>
    <graphics type="ELLIPSE" h="40.0" w="40.0" x="1896.856689453125" y="3693.78466796875" fill="#ccccff" width="1" outline="#666666" cy:nodeTransparency="1.0" cy:nodeLabelFont="SansSerif.bold-0-12" cy:nodeLabel="F11R" cy:borderLineType="solid"/>
  </node>
  <node label="414399" id="-138">
    <att type="string" name="canonicalName" value="414399"/>
    <att type="list" name="cytoscape.alias.list">
      <att type="string" name="cytoscape.alias.list" value="414399"/>
    </att>
    <att type="string" name="geneName" value="MRLC2"/>
    <att type="string" name="id" value="414399"/>
    <graphics type="ELLIPSE" h="40.0" w="40.0" x="1587.6842041015625" y="3949.731201171875" fill="#ccccff" width="1" outline="#666666" cy:nodeTransparency="1.0" cy:nodeLabelFont="SansSerif.bold-0-12" cy:nodeLabel="MRLC2" cy:borderLineType="solid"/>
  </node>
  <node label="397656" id="-137">
    <att type="string" name="canonicalName" value="397656"/>
    <att type="list" name="cytoscape.alias.list">
      <att type="string" name="cytoscape.alias.list" value="397656"/>
    </att>
    <att type="string" name="geneName" value="PPP2CA"/>
    <att type="string" name="id" value="397656"/>
    <graphics type="ELLIPSE" h="40.0" w="40.0" x="1972.727783203125" y="3605.734619140625" fill="#ccccff" width="1" outline="#666666" cy:nodeTransparency="1.0" cy:nodeLabelFont="SansSerif.bold-0-12" cy:nodeLabel="PPP2CA" cy:borderLineType="solid"/>
  </node>
  <node label="100625897" id="-136">
    <att type="string" name="canonicalName" value="100625897"/>
    <att type="list" name="cytoscape.alias.list">
      <att type="string" name="cytoscape.alias.list" value="100625897"/>
    </att>
    <att type="string" name="geneName" value="LOC100625897"/>
    <att type="string" name="id" value="100625897"/>
    <graphics type="ELLIPSE" h="40.0" w="40.0" x="1247.5496826171875" y="6064.49072265625" fill="#ccccff" width="1" outline="#666666" cy:nodeTransparency="1.0" cy:nodeLabelFont="SansSerif.bold-0-12" cy:nodeLabel="LOC100625897" cy:borderLineType="solid"/>
  </node>
  <node label="100521514" id="-135">
    <att type="string" name="canonicalName" value="100521514"/>
    <att type="list" name="cytoscape.alias.list">
      <att type="string" name="cytoscape.alias.list" value="100521514"/>
    </att>
    <att type="string" name="geneName" value="LOC100521514"/>
    <att type="string" name="id" value="100521514"/>
    <graphics type="ELLIPSE" h="40.0" w="40.0" x="1176.0244140625" y="6147.2763671875" fill="#ccccff" width="1" outline="#666666" cy:nodeTransparency="1.0" cy:nodeLabelFont="SansSerif.bold-0-12" cy:nodeLabel="LOC100521514" cy:borderLineType="solid"/>
  </node>
  <node label="100511655" id="-134">
    <att type="string" name="canonicalName" value="100511655"/>
    <att type="list" name="cytoscape.alias.list">
      <att type="string" name="cytoscape.alias.list" value="100511655"/>
    </att>
    <att type="string" name="geneName" value="B4GALT1"/>
    <att type="string" name="id" value="100511655"/>
    <graphics type="ELLIPSE" h="40.0" w="40.0" x="1317.2940673828125" y="5980.2080078125" fill="#ccccff" width="1" outline="#666666" cy:nodeTransparency="1.0" cy:nodeLabelFont="SansSerif.bold-0-12" cy:nodeLabel="B4GALT1" cy:borderLineType="solid"/>
  </node>
  <node label="397040" id="-133">
    <att type="string" name="canonicalName" value="397040"/>
    <att type="list" name="cytoscape.alias.list">
      <att type="string" name="cytoscape.alias.list" value="397040"/>
    </att>
    <att type="string" name="geneName" value="UGP2"/>
    <att type="string" name="id" value="397040"/>
    <graphics type="ELLIPSE" h="40.0" w="40.0" x="2409.65771484375" y="6279.349609375" fill="#ccccff" width="1" outline="#666666" cy:nodeTransparency="1.0" cy:nodeLabelFont="SansSerif.bold-0-12" cy:nodeLabel="UGP2" cy:borderLineType="solid"/>
  </node>
  <node label="100621392" id="-132">
    <att type="string" name="canonicalName" value="100621392"/>
    <att type="list" name="cytoscape.alias.list">
      <att type="string" name="cytoscape.alias.list" value="100621392"/>
    </att>
    <att type="string" name="geneName" value="GALE"/>
    <att type="string" name="id" value="100621392"/>
    <graphics type="ELLIPSE" h="40.0" w="40.0" x="2407.281005859375" y="6387.087890625" fill="#ccccff" width="1" outline="#666666" cy:nodeTransparency="1.0" cy:nodeLabelFont="SansSerif.bold-0-12" cy:nodeLabel="GALE" cy:borderLineType="solid"/>
  </node>
  <node label="100513412" id="-131">
    <att type="string" name="canonicalName" value="100513412"/>
    <att type="list" name="cytoscape.alias.list">
      <att type="string" name="cytoscape.alias.list" value="100513412"/>
    </att>
    <att type="string" name="geneName" value="ACTN1"/>
    <att type="string" name="id" value="100513412"/>
    <graphics type="ELLIPSE" h="40.0" w="40.0" x="2740.53466796875" y="5107.46923828125" fill="#ccccff" width="1" outline="#666666" cy:nodeTransparency="1.0" cy:nodeLabelFont="SansSerif.bold-0-12" cy:nodeLabel="ACTN1" cy:borderLineType="solid"/>
  </node>
  <node label="100525337" id="-130">
    <att type="string" name="canonicalName" value="100525337"/>
    <att type="list" name="cytoscape.alias.list">
      <att type="string" name="cytoscape.alias.list" value="100525337"/>
    </att>
    <att type="string" name="geneName" value="CTNNA2"/>
    <att type="string" name="id" value="100525337"/>
    <graphics type="ELLIPSE" h="40.0" w="40.0" x="2697.59033203125" y="5006.61865234375" fill="#ccccff" width="1" outline="#666666" cy:nodeTransparency="1.0" cy:nodeLabelFont="SansSerif.bold-0-12" cy:nodeLabel="CTNNA2" cy:borderLineType="solid"/>
  </node>
  <node label="100516662" id="-129">
    <att type="string" name="canonicalName" value="100516662"/>
    <att type="list" name="cytoscape.alias.list">
      <att type="string" name="cytoscape.alias.list" value="100516662"/>
    </att>
    <att type="string" name="geneName" value="LOC100516662"/>
    <att type="string" name="id" value="100516662"/>
    <graphics type="ELLIPSE" h="40.0" w="40.0" x="2625.261474609375" y="4943.29736328125" fill="#ccccff" width="1" outline="#666666" cy:nodeTransparency="1.0" cy:nodeLabelFont="SansSerif.bold-0-12" cy:nodeLabel="LOC100516662" cy:borderLineType="solid"/>
  </node>
  <node label="100523918" id="-128">
    <att type="string" name="canonicalName" value="100523918"/>
    <att type="list" name="cytoscape.alias.list">
      <att type="string" name="cytoscape.alias.list" value="100523918"/>
    </att>
    <att type="string" name="geneName" value="LOC100523918"/>
    <att type="string" name="id" value="100523918"/>
    <graphics type="ELLIPSE" h="40.0" w="40.0" x="2637.43505859375" y="5069.72216796875" fill="#ccccff" width="1" outline="#666666" cy:nodeTransparency="1.0" cy:nodeLabelFont="SansSerif.bold-0-12" cy:nodeLabel="LOC100523918" cy:borderLineType="solid"/>
  </node>
  <node label="100519531" id="-127">
    <att type="string" name="canonicalName" value="100519531"/>
    <att type="list" name="cytoscape.alias.list">
      <att type="string" name="cytoscape.alias.list" value="100519531"/>
    </att>
    <att type="string" name="geneName" value="LOC100519531"/>
    <att type="string" name="id" value="100519531"/>
    <graphics type="ELLIPSE" h="40.0" w="40.0" x="2570.465087890625" y="5000.99267578125" fill="#ccccff" width="1" outline="#666666" cy:nodeTransparency="1.0" cy:nodeLabelFont="SansSerif.bold-0-12" cy:nodeLabel="LOC100519531" cy:borderLineType="solid"/>
  </node>
  <node label="100516641" id="-126">
    <att type="string" name="canonicalName" value="100516641"/>
    <att type="list" name="cytoscape.alias.list">
      <att type="string" name="cytoscape.alias.list" value="100516641"/>
    </att>
    <att type="string" name="geneName" value="LOC100516641"/>
    <att type="string" name="id" value="100516641"/>
    <graphics type="ELLIPSE" h="40.0" w="40.0" x="1641.1029052734375" y="1176.60400390625" fill="#ccccff" width="1" outline="#666666" cy:nodeTransparency="1.0" cy:nodeLabelFont="SansSerif.bold-0-12" cy:nodeLabel="LOC100516641" cy:borderLineType="solid"/>
  </node>
  <node label="100628197" id="-125">
    <att type="string" name="canonicalName" value="100628197"/>
    <att type="list" name="cytoscape.alias.list">
      <att type="string" name="cytoscape.alias.list" value="100628197"/>
    </att>
    <att type="string" name="geneName" value="DHCR24"/>
    <att type="string" name="id" value="100628197"/>
    <graphics type="ELLIPSE" h="40.0" w="40.0" x="1001.9576416015625" y="6060.71142578125" fill="#ccccff" width="1" outline="#666666" cy:nodeTransparency="1.0" cy:nodeLabelFont="SansSerif.bold-0-12" cy:nodeLabel="DHCR24" cy:borderLineType="solid"/>
  </node>
  <node label="100628166" id="-124">
    <att type="string" name="canonicalName" value="100628166"/>
    <att type="list" name="cytoscape.alias.list">
      <att type="string" name="cytoscape.alias.list" value="100628166"/>
    </att>
    <att type="string" name="geneName" value="SOAT1"/>
    <att type="string" name="id" value="100628166"/>
    <graphics type="ELLIPSE" h="40.0" w="40.0" x="915.77685546875" y="6128.08251953125" fill="#ccccff" width="1" outline="#666666" cy:nodeTransparency="1.0" cy:nodeLabelFont="SansSerif.bold-0-12" cy:nodeLabel="SOAT1" cy:borderLineType="solid"/>
  </node>
  <node label="403334" id="-123">
    <att type="string" name="canonicalName" value="403334"/>
    <att type="list" name="cytoscape.alias.list">
      <att type="string" name="cytoscape.alias.list" value="403334"/>
    </att>
    <att type="string" name="geneName" value="CYP51"/>
    <att type="string" name="id" value="403334"/>
    <graphics type="ELLIPSE" h="40.0" w="40.0" x="1076.0244140625" y="5980.2080078125" fill="#ccccff" width="1" outline="#666666" cy:nodeTransparency="1.0" cy:nodeLabelFont="SansSerif.bold-0-12" cy:nodeLabel="CYP51" cy:borderLineType="solid"/>
  </node>
  <node label="100155449" id="-122">
    <att type="string" name="canonicalName" value="100155449"/>
    <att type="list" name="cytoscape.alias.list">
      <att type="string" name="cytoscape.alias.list" value="100155449"/>
    </att>
    <att type="string" name="geneName" value="RUNX1T1"/>
    <att type="string" name="id" value="100155449"/>
    <graphics type="ELLIPSE" h="40.0" w="40.0" x="1519.02880859375" y="5579.4306640625" fill="#ccccff" width="1" outline="#666666" cy:nodeTransparency="1.0" cy:nodeLabelFont="SansSerif.bold-0-12" cy:nodeLabel="RUNX1T1" cy:borderLineType="solid"/>
  </node>
  <node label="396810" id="-121">
    <att type="string" name="canonicalName" value="396810"/>
    <att type="list" name="cytoscape.alias.list">
      <att type="string" name="cytoscape.alias.list" value="396810"/>
    </att>
    <att type="string" name="geneName" value="KIT"/>
    <att type="string" name="id" value="396810"/>
    <graphics type="ELLIPSE" h="40.0" w="40.0" x="1065.653564453125" y="2897.752685546875" fill="#ccccff" width="1" outline="#666666" cy:nodeTransparency="1.0" cy:nodeLabelFont="SansSerif.bold-0-12" cy:nodeLabel="KIT" cy:borderLineType="solid"/>
  </node>
  <node label="100512633" id="-120">
    <att type="string" name="canonicalName" value="100512633"/>
    <att type="list" name="cytoscape.alias.list">
      <att type="string" name="cytoscape.alias.list" value="100512633"/>
    </att>
    <att type="string" name="geneName" value="RUNX1"/>
    <att type="string" name="id" value="100512633"/>
    <graphics type="ELLIPSE" h="40.0" w="40.0" x="1436.7080078125" y="551.098388671875" fill="#ccccff" width="1" outline="#666666" cy:nodeTransparency="1.0" cy:nodeLabelFont="SansSerif.bold-0-12" cy:nodeLabel="RUNX1" cy:borderLineType="solid"/>
  </node>
  <node label="100513609" id="-119">
    <att type="string" name="canonicalName" value="100513609"/>
    <att type="list" name="cytoscape.alias.list">
      <att type="string" name="cytoscape.alias.list" value="100513609"/>
    </att>
    <att type="string" name="geneName" value="GAB2"/>
    <att type="string" name="id" value="100513609"/>
    <graphics type="ELLIPSE" h="40.0" w="40.0" x="2189.03271484375" y="2475.11767578125" fill="#ccccff" width="1" outline="#666666" cy:nodeTransparency="1.0" cy:nodeLabelFont="SansSerif.bold-0-12" cy:nodeLabel="GAB2" cy:borderLineType="solid"/>
  </node>
  <node label="397142" id="-118">
    <att type="string" name="canonicalName" value="397142"/>
    <att type="list" name="cytoscape.alias.list">
      <att type="string" name="cytoscape.alias.list" value="397142"/>
    </att>
    <att type="string" name="geneName" value="SMAD4"/>
    <att type="string" name="id" value="397142"/>
    <graphics type="ELLIPSE" h="40.0" w="40.0" x="1556.747802734375" y="2969.927490234375" fill="#ccccff" width="1" outline="#666666" cy:nodeTransparency="1.0" cy:nodeLabelFont="SansSerif.bold-0-12" cy:nodeLabel="SMAD4" cy:borderLineType="solid"/>
  </node>
  <node label="100135665" id="-117">
    <att type="string" name="canonicalName" value="100135665"/>
    <att type="list" name="cytoscape.alias.list">
      <att type="string" name="cytoscape.alias.list" value="100135665"/>
    </att>
    <att type="string" name="geneName" value="RELA"/>
    <att type="string" name="id" value="100135665"/>
    <graphics type="ELLIPSE" h="40.0" w="40.0" x="2090.43359375" y="2888.621337890625" fill="#ccccff" width="1" outline="#666666" cy:nodeTransparency="1.0" cy:nodeLabelFont="SansSerif.bold-0-12" cy:nodeLabel="RELA" cy:borderLineType="solid"/>
  </node>
  <node label="100519155" id="-116">
    <att type="string" name="canonicalName" value="100519155"/>
    <att type="list" name="cytoscape.alias.list">
      <att type="string" name="cytoscape.alias.list" value="100519155"/>
    </att>
    <att type="string" name="geneName" value="RALBP1"/>
    <att type="string" name="id" value="100519155"/>
    <graphics type="ELLIPSE" h="40.0" w="40.0" x="2307.281005859375" y="6279.349609375" fill="#ccccff" width="1" outline="#666666" cy:nodeTransparency="1.0" cy:nodeLabelFont="SansSerif.bold-0-12" cy:nodeLabel="RALBP1" cy:borderLineType="solid"/>
  </node>
  <node label="780428" id="-115">
    <att type="string" name="canonicalName" value="780428"/>
    <att type="list" name="cytoscape.alias.list">
      <att type="string" name="cytoscape.alias.list" value="780428"/>
    </att>
    <att type="string" name="geneName" value="CDC42"/>
    <att type="string" name="id" value="780428"/>
    <graphics type="ELLIPSE" h="40.0" w="40.0" x="2304.95947265625" y="6387.0888671875" fill="#ccccff" width="1" outline="#666666" cy:nodeTransparency="1.0" cy:nodeLabelFont="SansSerif.bold-0-12" cy:nodeLabel="CDC42" cy:borderLineType="solid"/>
  </node>
  <node label="397276" id="-114">
    <att type="string" name="canonicalName" value="397276"/>
    <att type="list" name="cytoscape.alias.list">
      <att type="string" name="cytoscape.alias.list" value="397276"/>
    </att>
    <att type="string" name="geneName" value="TP53"/>
    <att type="string" name="id" value="397276"/>
    <graphics type="ELLIPSE" h="40.0" w="40.0" x="1135.6455078125" y="5880.2080078125" fill="#ccccff" width="1" outline="#666666" cy:nodeTransparency="1.0" cy:nodeLabelFont="SansSerif.bold-0-12" cy:nodeLabel="TP53" cy:borderLineType="solid"/>
  </node>
  <node label="397084" id="-113">
    <att type="string" name="canonicalName" value="397084"/>
    <att type="list" name="cytoscape.alias.list">
      <att type="string" name="cytoscape.alias.list" value="397084"/>
    </att>
    <att type="string" name="geneName" value="TGFB2"/>
    <att type="string" name="id" value="397084"/>
    <graphics type="ELLIPSE" h="40.0" w="40.0" x="1081.6978759765625" y="5784.53857421875" fill="#ccccff" width="1" outline="#666666" cy:nodeTransparency="1.0" cy:nodeLabelFont="SansSerif.bold-0-12" cy:nodeLabel="TGFB2" cy:borderLineType="solid"/>
  </node>
  <node label="396696" id="-112">
    <att type="string" name="canonicalName" value="396696"/>
    <att type="list" name="cytoscape.alias.list">
      <att type="string" name="cytoscape.alias.list" value="396696"/>
    </att>
    <att type="string" name="geneName" value="HIF1A"/>
    <att type="string" name="id" value="396696"/>
    <graphics type="ELLIPSE" h="40.0" w="40.0" x="1035.7646484375" y="5682.98046875" fill="#ccccff" width="1" outline="#666666" cy:nodeTransparency="1.0" cy:nodeLabelFont="SansSerif.bold-0-12" cy:nodeLabel="HIF1A" cy:borderLineType="solid"/>
  </node>
  <node label="397400" id="-111">
    <att type="string" name="canonicalName" value="397400"/>
    <att type="list" name="cytoscape.alias.list">
      <att type="string" name="cytoscape.alias.list" value="397400"/>
    </att>
    <att type="string" name="geneName" value="TGFB3"/>
    <att type="string" name="id" value="397400"/>
    <graphics type="ELLIPSE" h="40.0" w="40.0" x="999.3079833984375" y="5579.4306640625" fill="#ccccff" width="1" outline="#666666" cy:nodeTransparency="1.0" cy:nodeLabelFont="SansSerif.bold-0-12" cy:nodeLabel="TGFB3" cy:borderLineType="solid"/>
  </node>
  <node label="414388" id="-110">
    <att type="string" name="canonicalName" value="414388"/>
    <att type="list" name="cytoscape.alias.list">
      <att type="string" name="cytoscape.alias.list" value="414388"/>
    </att>
    <att type="string" name="geneName" value="TPM3"/>
    <att type="string" name="id" value="414388"/>
    <graphics type="ELLIPSE" h="40.0" w="40.0" x="2707.09423828125" y="2494.40771484375" fill="#ccccff" width="1" outline="#666666" cy:nodeTransparency="1.0" cy:nodeLabelFont="SansSerif.bold-0-12" cy:nodeLabel="TPM3" cy:borderLineType="solid"/>
  </node>
  <node label="414406" id="-109">
    <att type="string" name="canonicalName" value="414406"/>
    <att type="list" name="cytoscape.alias.list">
      <att type="string" name="cytoscape.alias.list" value="414406"/>
    </att>
    <att type="string" name="geneName" value="TFG"/>
    <att type="string" name="id" value="414406"/>
    <graphics type="ELLIPSE" h="40.0" w="40.0" x="2636.10693359375" y="2361.25439453125" fill="#ccccff" width="1" outline="#666666" cy:nodeTransparency="1.0" cy:nodeLabelFont="SansSerif.bold-0-12" cy:nodeLabel="TFG" cy:borderLineType="solid"/>
  </node>
  <node label="100142689" id="-108">
    <att type="string" name="canonicalName" value="100142689"/>
    <att type="list" name="cytoscape.alias.list">
      <att type="string" name="cytoscape.alias.list" value="100142689"/>
    </att>
    <att type="string" name="geneName" value="CREB3"/>
    <att type="string" name="id" value="100142689"/>
    <graphics type="ELLIPSE" h="40.0" w="40.0" x="1365.09375" y="2723.218994140625" fill="#ccccff" width="1" outline="#666666" cy:nodeTransparency="1.0" cy:nodeLabelFont="SansSerif.bold-0-12" cy:nodeLabel="CREB3" cy:borderLineType="solid"/>
  </node>
  <node label="100156642" id="-107">
    <att type="string" name="canonicalName" value="100156642"/>
    <att type="list" name="cytoscape.alias.list">
      <att type="string" name="cytoscape.alias.list" value="100156642"/>
    </att>
    <att type="string" name="geneName" value="SLK"/>
    <att type="string" name="id" value="100156642"/>
    <graphics type="ELLIPSE" h="40.0" w="40.0" x="731.1137084960938" y="6179.349609375" fill="#ccccff" width="1" outline="#666666" cy:nodeTransparency="1.0" cy:nodeLabelFont="SansSerif.bold-0-12" cy:nodeLabel="SLK" cy:borderLineType="solid"/>
  </node>
  <node label="100151864" id="-106">
    <att type="string" name="canonicalName" value="100151864"/>
    <att type="list" name="cytoscape.alias.list">
      <att type="string" name="cytoscape.alias.list" value="100151864"/>
    </att>
    <att type="string" name="geneName" value="SMC3"/>
    <att type="string" name="id" value="100151864"/>
    <graphics type="ELLIPSE" h="40.0" w="40.0" x="773.1403198242188" y="6080.09521484375" fill="#ccccff" width="1" outline="#666666" cy:nodeTransparency="1.0" cy:nodeLabelFont="SansSerif.bold-0-12" cy:nodeLabel="SMC3" cy:borderLineType="solid"/>
  </node>
  <node label="100515014" id="-105">
    <att type="string" name="canonicalName" value="100515014"/>
    <att type="list" name="cytoscape.alias.list">
      <att type="string" name="cytoscape.alias.list" value="100515014"/>
    </att>
    <att type="string" name="geneName" value="CDC23"/>
    <att type="string" name="id" value="100515014"/>
    <graphics type="ELLIPSE" h="40.0" w="40.0" x="2204.95947265625" y="6279.349609375" fill="#ccccff" width="1" outline="#666666" cy:nodeTransparency="1.0" cy:nodeLabelFont="SansSerif.bold-0-12" cy:nodeLabel="CDC23" cy:borderLineType="solid"/>
  </node>
  <node label="100736650" id="-104">
    <att type="string" name="canonicalName" value="100736650"/>
    <att type="list" name="cytoscape.alias.list">
      <att type="string" name="cytoscape.alias.list" value="100736650"/>
    </att>
    <att type="string" name="geneName" value="LOC100736650"/>
    <att type="string" name="id" value="100736650"/>
    <graphics type="ELLIPSE" h="40.0" w="40.0" x="2202.162841796875" y="6387.07763671875" fill="#ccccff" width="1" outline="#666666" cy:nodeTransparency="1.0" cy:nodeLabelFont="SansSerif.bold-0-12" cy:nodeLabel="LOC100736650" cy:borderLineType="solid"/>
  </node>
  <node label="100144474" id="-103">
    <att type="string" name="canonicalName" value="100144474"/>
    <att type="list" name="cytoscape.alias.list">
      <att type="string" name="cytoscape.alias.list" value="100144474"/>
    </att>
    <att type="string" name="geneName" value="CDC25C"/>
    <att type="string" name="id" value="100144474"/>
    <graphics type="ELLIPSE" h="40.0" w="40.0" x="1537.69677734375" y="1822.798828125" fill="#ccccff" width="1" outline="#666666" cy:nodeTransparency="1.0" cy:nodeLabelFont="SansSerif.bold-0-12" cy:nodeLabel="CDC25C" cy:borderLineType="solid"/>
  </node>
  <node label="100048944" id="-102">
    <att type="string" name="canonicalName" value="100048944"/>
    <att type="list" name="cytoscape.alias.list">
      <att type="string" name="cytoscape.alias.list" value="100048944"/>
    </att>
    <att type="string" name="geneName" value="CPEB1"/>
    <att type="string" name="id" value="100048944"/>
    <graphics type="ELLIPSE" h="40.0" w="40.0" x="815.77685546875" y="5980.2080078125" fill="#ccccff" width="1" outline="#666666" cy:nodeTransparency="1.0" cy:nodeLabelFont="SansSerif.bold-0-12" cy:nodeLabel="CPEB1" cy:borderLineType="solid"/>
  </node>
  <node label="397582" id="-101">
    <att type="string" name="canonicalName" value="397582"/>
    <att type="list" name="cytoscape.alias.list">
      <att type="string" name="cytoscape.alias.list" value="397582"/>
    </att>
    <att type="string" name="geneName" value="AR"/>
    <att type="string" name="id" value="397582"/>
    <graphics type="ELLIPSE" h="40.0" w="40.0" x="2443.144287109375" y="1986.6075439453125" fill="#ccccff" width="1" outline="#666666" cy:nodeTransparency="1.0" cy:nodeLabelFont="SansSerif.bold-0-12" cy:nodeLabel="AR" cy:borderLineType="solid"/>
  </node>
  <node label="100152942" id="-100">
    <att type="string" name="canonicalName" value="100152942"/>
    <att type="list" name="cytoscape.alias.list">
      <att type="string" name="cytoscape.alias.list" value="100152942"/>
    </att>
    <att type="string" name="geneName" value="GNPNAT1"/>
    <att type="string" name="id" value="100152942"/>
    <graphics type="ELLIPSE" h="40.0" w="40.0" x="2457.58837890625" y="5263.91357421875" fill="#ccccff" width="1" outline="#666666" cy:nodeTransparency="1.0" cy:nodeLabelFont="SansSerif.bold-0-12" cy:nodeLabel="GNPNAT1" cy:borderLineType="solid"/>
  </node>
  <node label="100152344" id="-99">
    <att type="string" name="canonicalName" value="100152344"/>
    <att type="list" name="cytoscape.alias.list">
      <att type="string" name="cytoscape.alias.list" value="100152344"/>
    </att>
    <att type="string" name="geneName" value="HK1"/>
    <att type="string" name="id" value="100152344"/>
    <graphics type="ELLIPSE" h="40.0" w="40.0" x="1262.0980224609375" y="4985.2822265625" fill="#ccccff" width="1" outline="#666666" cy:nodeTransparency="1.0" cy:nodeLabelFont="SansSerif.bold-0-12" cy:nodeLabel="HK1" cy:borderLineType="solid"/>
  </node>
  <node label="100516092" id="-98">
    <att type="string" name="canonicalName" value="100516092"/>
    <att type="list" name="cytoscape.alias.list">
      <att type="string" name="cytoscape.alias.list" value="100516092"/>
    </att>
    <att type="string" name="geneName" value="LOC100516092"/>
    <att type="string" name="id" value="100516092"/>
    <graphics type="ELLIPSE" h="40.0" w="40.0" x="2422.66796875" y="5368.68896484375" fill="#ccccff" width="1" outline="#666666" cy:nodeTransparency="1.0" cy:nodeLabelFont="SansSerif.bold-0-12" cy:nodeLabel="LOC100516092" cy:borderLineType="solid"/>
  </node>
  <node label="100520022" id="-97">
    <att type="string" name="canonicalName" value="100520022"/>
    <att type="list" name="cytoscape.alias.list">
      <att type="string" name="cytoscape.alias.list" value="100520022"/>
    </att>
    <att type="string" name="geneName" value="LOC100520022"/>
    <att type="string" name="id" value="100520022"/>
    <graphics type="ELLIPSE" h="40.0" w="40.0" x="2102.162841796875" y="6279.349609375" fill="#ccccff" width="1" outline="#666666" cy:nodeTransparency="1.0" cy:nodeLabelFont="SansSerif.bold-0-12" cy:nodeLabel="LOC100520022" cy:borderLineType="solid"/>
  </node>
  <node label="100155883" id="-96">
    <att type="string" name="canonicalName" value="100155883"/>
    <att type="list" name="cytoscape.alias.list">
      <att type="string" name="cytoscape.alias.list" value="100155883"/>
    </att>
    <att type="string" name="geneName" value="NANS"/>
    <att type="string" name="id" value="100155883"/>
    <graphics type="ELLIPSE" h="40.0" w="40.0" x="2099.40234375" y="6387.07861328125" fill="#ccccff" width="1" outline="#666666" cy:nodeTransparency="1.0" cy:nodeLabelFont="SansSerif.bold-0-12" cy:nodeLabel="NANS" cy:borderLineType="solid"/>
  </node>
  <node label="397602" id="-95">
    <att type="string" name="canonicalName" value="397602"/>
    <att type="list" name="cytoscape.alias.list">
      <att type="string" name="cytoscape.alias.list" value="397602"/>
    </att>
    <att type="string" name="geneName" value="GPI"/>
    <att type="string" name="id" value="397602"/>
    <graphics type="ELLIPSE" h="40.0" w="40.0" x="1281.851318359375" y="5103.12939453125" fill="#ccccff" width="1" outline="#666666" cy:nodeTransparency="1.0" cy:nodeLabelFont="SansSerif.bold-0-12" cy:nodeLabel="GPI" cy:borderLineType="solid"/>
  </node>
  <node label="100154551" id="-94">
    <att type="string" name="canonicalName" value="100154551"/>
    <att type="list" name="cytoscape.alias.list">
      <att type="string" name="cytoscape.alias.list" value="100154551"/>
    </att>
    <att type="string" name="geneName" value="MPI"/>
    <att type="string" name="id" value="100154551"/>
    <graphics type="ELLIPSE" h="40.0" w="40.0" x="1180.2666015625" y="5058.51611328125" fill="#ccccff" width="1" outline="#666666" cy:nodeTransparency="1.0" cy:nodeLabelFont="SansSerif.bold-0-12" cy:nodeLabel="MPI" cy:borderLineType="solid"/>
  </node>
  <node label="100153829" id="-93">
    <att type="string" name="canonicalName" value="100153829"/>
    <att type="list" name="cytoscape.alias.list">
      <att type="string" name="cytoscape.alias.list" value="100153829"/>
    </att>
    <att type="string" name="geneName" value="LOC100153829"/>
    <att type="string" name="id" value="100153829"/>
    <graphics type="ELLIPSE" h="40.0" w="40.0" x="1313.209228515625" y="1093.8375244140625" fill="#ccccff" width="1" outline="#666666" cy:nodeTransparency="1.0" cy:nodeLabelFont="SansSerif.bold-0-12" cy:nodeLabel="LOC100153829" cy:borderLineType="solid"/>
  </node>
  <node label="100738655" id="-92">
    <att type="string" name="canonicalName" value="100738655"/>
    <att type="list" name="cytoscape.alias.list">
      <att type="string" name="cytoscape.alias.list" value="100738655"/>
    </att>
    <att type="string" name="geneName" value="LOC100738655"/>
    <att type="string" name="id" value="100738655"/>
    <graphics type="ELLIPSE" h="40.0" w="40.0" x="1999.40234375" y="6279.349609375" fill="#ccccff" width="1" outline="#666666" cy:nodeTransparency="1.0" cy:nodeLabelFont="SansSerif.bold-0-12" cy:nodeLabel="LOC100738655" cy:borderLineType="solid"/>
  </node>
  <node label="100516888" id="-91">
    <att type="string" name="canonicalName" value="100516888"/>
    <att type="list" name="cytoscape.alias.list">
      <att type="string" name="cytoscape.alias.list" value="100516888"/>
    </att>
    <att type="string" name="geneName" value="LOC100516888"/>
    <att type="string" name="id" value="100516888"/>
    <graphics type="ELLIPSE" h="40.0" w="40.0" x="1997.080810546875" y="6387.0888671875" fill="#ccccff" width="1" outline="#666666" cy:nodeTransparency="1.0" cy:nodeLabelFont="SansSerif.bold-0-12" cy:nodeLabel="LOC100516888" cy:borderLineType="solid"/>
  </node>
  <node label="100518396" id="-90">
    <att type="string" name="canonicalName" value="100518396"/>
    <att type="list" name="cytoscape.alias.list">
      <att type="string" name="cytoscape.alias.list" value="100518396"/>
    </att>
    <att type="string" name="geneName" value="TRAF4"/>
    <att type="string" name="id" value="100518396"/>
    <graphics type="ELLIPSE" h="40.0" w="40.0" x="1182.077392578125" y="1103.544921875" fill="#ccccff" width="1" outline="#666666" cy:nodeTransparency="1.0" cy:nodeLabelFont="SansSerif.bold-0-12" cy:nodeLabel="TRAF4" cy:borderLineType="solid"/>
  </node>
  <node label="100156979" id="-89">
    <att type="string" name="canonicalName" value="100156979"/>
    <att type="list" name="cytoscape.alias.list">
      <att type="string" name="cytoscape.alias.list" value="100156979"/>
    </att>
    <att type="string" name="geneName" value="LOC100156979"/>
    <att type="string" name="id" value="100156979"/>
    <graphics type="ELLIPSE" h="40.0" w="40.0" x="1197.763427734375" y="1021.759033203125" fill="#ccccff" width="1" outline="#666666" cy:nodeTransparency="1.0" cy:nodeLabelFont="SansSerif.bold-0-12" cy:nodeLabel="LOC100156979" cy:borderLineType="solid"/>
  </node>
  <node label="100622590" id="-88">
    <att type="string" name="canonicalName" value="100622590"/>
    <att type="list" name="cytoscape.alias.list">
      <att type="string" name="cytoscape.alias.list" value="100622590"/>
    </att>
    <att type="string" name="geneName" value="BIRC3"/>
    <att type="string" name="id" value="100622590"/>
    <graphics type="ELLIPSE" h="40.0" w="40.0" x="1271.270751953125" y="974.3681640625" fill="#ccccff" width="1" outline="#666666" cy:nodeTransparency="1.0" cy:nodeLabelFont="SansSerif.bold-0-12" cy:nodeLabel="BIRC3" cy:borderLineType="solid"/>
  </node>
  <node label="100524481" id="-87">
    <att type="string" name="canonicalName" value="100524481"/>
    <att type="list" name="cytoscape.alias.list">
      <att type="string" name="cytoscape.alias.list" value="100524481"/>
    </att>
    <att type="string" name="geneName" value="LOC100524481"/>
    <att type="string" name="id" value="100524481"/>
    <graphics type="ELLIPSE" h="40.0" w="40.0" x="1897.080810546875" y="6279.349609375" fill="#ccccff" width="1" outline="#666666" cy:nodeTransparency="1.0" cy:nodeLabelFont="SansSerif.bold-0-12" cy:nodeLabel="LOC100524481" cy:borderLineType="solid"/>
  </node>
  <node label="100625582" id="-86">
    <att type="string" name="canonicalName" value="100625582"/>
    <att type="list" name="cytoscape.alias.list">
      <att type="string" name="cytoscape.alias.list" value="100625582"/>
    </att>
    <att type="string" name="geneName" value="LOC100625582"/>
    <att type="string" name="id" value="100625582"/>
    <graphics type="ELLIPSE" h="40.0" w="40.0" x="1894.272216796875" y="6387.07763671875" fill="#ccccff" width="1" outline="#666666" cy:nodeTransparency="1.0" cy:nodeLabelFont="SansSerif.bold-0-12" cy:nodeLabel="LOC100625582" cy:borderLineType="solid"/>
  </node>
  <node label="780418" id="-85">
    <att type="string" name="canonicalName" value="780418"/>
    <att type="list" name="cytoscape.alias.list">
      <att type="string" name="cytoscape.alias.list" value="780418"/>
    </att>
    <att type="string" name="geneName" value="UBE2D2"/>
    <att type="string" name="id" value="780418"/>
    <graphics type="ELLIPSE" h="40.0" w="40.0" x="1694.2294921875" y="244.4793701171875" fill="#ccccff" width="1" outline="#666666" cy:nodeTransparency="1.0" cy:nodeLabelFont="SansSerif.bold-0-12" cy:nodeLabel="UBE2D2" cy:borderLineType="solid"/>
  </node>
  <node label="396741" id="-84">
    <att type="string" name="canonicalName" value="396741"/>
    <att type="list" name="cytoscape.alias.list">
      <att type="string" name="cytoscape.alias.list" value="396741"/>
    </att>
    <att type="string" name="geneName" value="DNAJB1"/>
    <att type="string" name="id" value="396741"/>
    <graphics type="ELLIPSE" h="40.0" w="40.0" x="1700.5694580078125" y="114.9754638671875" fill="#ccccff" width="1" outline="#666666" cy:nodeTransparency="1.0" cy:nodeLabelFont="SansSerif.bold-0-12" cy:nodeLabel="DNAJB1" cy:borderLineType="solid"/>
  </node>
  <node label="100156234" id="-83">
    <att type="string" name="canonicalName" value="100156234"/>
    <att type="list" name="cytoscape.alias.list">
      <att type="string" name="cytoscape.alias.list" value="100156234"/>
    </att>
    <att type="string" name="geneName" value="DNAJB12"/>
    <att type="string" name="id" value="100156234"/>
    <graphics type="ELLIPSE" h="40.0" w="40.0" x="1724.776611328125" y="382.8599853515625" fill="#ccccff" width="1" outline="#666666" cy:nodeTransparency="1.0" cy:nodeLabelFont="SansSerif.bold-0-12" cy:nodeLabel="DNAJB12" cy:borderLineType="solid"/>
  </node>
  <node label="100154318" id="-82">
    <att type="string" name="canonicalName" value="100154318"/>
    <att type="list" name="cytoscape.alias.list">
      <att type="string" name="cytoscape.alias.list" value="100154318"/>
    </att>
    <att type="string" name="geneName" value="LOC100154318"/>
    <att type="string" name="id" value="100154318"/>
    <graphics type="ELLIPSE" h="40.0" w="40.0" x="2010.4793701171875" y="5101.92578125" fill="#ccccff" width="1" outline="#666666" cy:nodeTransparency="1.0" cy:nodeLabelFont="SansSerif.bold-0-12" cy:nodeLabel="LOC100154318" cy:borderLineType="solid"/>
  </node>
  <node label="100511362" id="-81">
    <att type="string" name="canonicalName" value="100511362"/>
    <att type="list" name="cytoscape.alias.list">
      <att type="string" name="cytoscape.alias.list" value="100511362"/>
    </att>
    <att type="string" name="geneName" value="SEC61B"/>
    <att type="string" name="id" value="100511362"/>
    <graphics type="ELLIPSE" h="40.0" w="40.0" x="2111.850341796875" y="5054.42578125" fill="#ccccff" width="1" outline="#666666" cy:nodeTransparency="1.0" cy:nodeLabelFont="SansSerif.bold-0-12" cy:nodeLabel="SEC61B" cy:borderLineType="solid"/>
  </node>
  <node label="100523265" id="-80">
    <att type="string" name="canonicalName" value="100523265"/>
    <att type="list" name="cytoscape.alias.list">
      <att type="string" name="cytoscape.alias.list" value="100523265"/>
    </att>
    <att type="string" name="geneName" value="LOC100523265"/>
    <att type="string" name="id" value="100523265"/>
    <graphics type="ELLIPSE" h="40.0" w="40.0" x="1727.2740478515625" y="0.0" fill="#ccccff" width="1" outline="#666666" cy:nodeTransparency="1.0" cy:nodeLabelFont="SansSerif.bold-0-12" cy:nodeLabel="LOC100523265" cy:borderLineType="solid"/>
  </node>
  <node label="100156093" id="-79">
    <att type="string" name="canonicalName" value="100156093"/>
    <att type="list" name="cytoscape.alias.list">
      <att type="string" name="cytoscape.alias.list" value="100156093"/>
    </att>
    <att type="string" name="geneName" value="LOC100156093"/>
    <att type="string" name="id" value="100156093"/>
    <graphics type="ELLIPSE" h="40.0" w="40.0" x="526.0745239257812" y="6169.3916015625" fill="#ccccff" width="1" outline="#666666" cy:nodeTransparency="1.0" cy:nodeLabelFont="SansSerif.bold-0-12" cy:nodeLabel="LOC100156093" cy:borderLineType="solid"/>
  </node>
  <node label="100523493" id="-78">
    <att type="string" name="canonicalName" value="100523493"/>
    <att type="list" name="cytoscape.alias.list">
      <att type="string" name="cytoscape.alias.list" value="100523493"/>
    </att>
    <att type="string" name="geneName" value="CKAP4"/>
    <att type="string" name="id" value="100523493"/>
    <graphics type="ELLIPSE" h="40.0" w="40.0" x="579.1666870117188" y="6075.59130859375" fill="#ccccff" width="1" outline="#666666" cy:nodeTransparency="1.0" cy:nodeLabelFont="SansSerif.bold-0-12" cy:nodeLabel="CKAP4" cy:borderLineType="solid"/>
  </node>
  <node label="100523300" id="-77">
    <att type="string" name="canonicalName" value="100523300"/>
    <att type="list" name="cytoscape.alias.list">
      <att type="string" name="cytoscape.alias.list" value="100523300"/>
    </att>
    <att type="string" name="geneName" value="LOC100523300"/>
    <att type="string" name="id" value="100523300"/>
    <graphics type="ELLIPSE" h="40.0" w="40.0" x="2098.27001953125" y="4943.29736328125" fill="#ccccff" width="1" outline="#666666" cy:nodeTransparency="1.0" cy:nodeLabelFont="SansSerif.bold-0-12" cy:nodeLabel="LOC100523300" cy:borderLineType="solid"/>
  </node>
  <node label="780417" id="-76">
    <att type="string" name="canonicalName" value="780417"/>
    <att type="list" name="cytoscape.alias.list">
      <att type="string" name="cytoscape.alias.list" value="780417"/>
    </att>
    <att type="string" name="geneName" value="LOC780417"/>
    <att type="string" name="id" value="780417"/>
    <graphics type="ELLIPSE" h="40.0" w="40.0" x="1839.6319580078125" y="398.5733642578125" fill="#ccccff" width="1" outline="#666666" cy:nodeTransparency="1.0" cy:nodeLabelFont="SansSerif.bold-0-12" cy:nodeLabel="LOC780417" cy:borderLineType="solid"/>
  </node>
  <node label="397606" id="-75">
    <att type="string" name="canonicalName" value="397606"/>
    <att type="list" name="cytoscape.alias.list">
      <att type="string" name="cytoscape.alias.list" value="397606"/>
    </att>
    <att type="string" name="geneName" value="RPN1"/>
    <att type="string" name="id" value="397606"/>
    <graphics type="ELLIPSE" h="40.0" w="40.0" x="631.1137084960938" y="5980.2080078125" fill="#ccccff" width="1" outline="#666666" cy:nodeTransparency="1.0" cy:nodeLabelFont="SansSerif.bold-0-12" cy:nodeLabel="RPN1" cy:borderLineType="solid"/>
  </node>
  <node label="733673" id="-74">
    <att type="string" name="canonicalName" value="733673"/>
    <att type="list" name="cytoscape.alias.list">
      <att type="string" name="cytoscape.alias.list" value="733673"/>
    </att>
    <att type="string" name="geneName" value="PARK2"/>
    <att type="string" name="id" value="733673"/>
    <graphics type="ELLIPSE" h="40.0" w="40.0" x="1793.27685546875" y="6279.349609375" fill="#ccccff" width="1" outline="#666666" cy:nodeTransparency="1.0" cy:nodeLabelFont="SansSerif.bold-0-12" cy:nodeLabel="PARK2" cy:borderLineType="solid"/>
  </node>
  <node label="100511251" id="-73">
    <att type="string" name="canonicalName" value="100511251"/>
    <att type="list" name="cytoscape.alias.list">
      <att type="string" name="cytoscape.alias.list" value="100511251"/>
    </att>
    <att type="string" name="geneName" value="LOC100511251"/>
    <att type="string" name="id" value="100511251"/>
    <graphics type="ELLIPSE" h="40.0" w="40.0" x="1794.272216796875" y="6387.109375" fill="#ccccff" width="1" outline="#666666" cy:nodeTransparency="1.0" cy:nodeLabelFont="SansSerif.bold-0-12" cy:nodeLabel="LOC100511251" cy:borderLineType="solid"/>
  </node>
  <node label="100192435" id="-72">
    <att type="string" name="canonicalName" value="100192435"/>
    <att type="list" name="cytoscape.alias.list">
      <att type="string" name="cytoscape.alias.list" value="100192435"/>
    </att>
    <att type="string" name="geneName" value="ERO1L"/>
    <att type="string" name="id" value="100192435"/>
    <graphics type="ELLIPSE" h="40.0" w="40.0" x="109.35099792480469" y="5984.42724609375" fill="#ccccff" width="1" outline="#666666" cy:nodeTransparency="1.0" cy:nodeLabelFont="SansSerif.bold-0-12" cy:nodeLabel="ERO1L" cy:borderLineType="solid"/>
  </node>
  <node label="100156625" id="-71">
    <att type="string" name="canonicalName" value="100156625"/>
    <att type="list" name="cytoscape.alias.list">
      <att type="string" name="cytoscape.alias.list" value="100156625"/>
    </att>
    <att type="string" name="geneName" value="ERP29"/>
    <att type="string" name="id" value="100156625"/>
    <graphics type="ELLIPSE" h="40.0" w="40.0" x="0.0" y="5980.2080078125" fill="#ccccff" width="1" outline="#666666" cy:nodeTransparency="1.0" cy:nodeLabelFont="SansSerif.bold-0-12" cy:nodeLabel="ERP29" cy:borderLineType="solid"/>
  </node>
  <node label="100157247" id="-70">
    <att type="string" name="canonicalName" value="100157247"/>
    <att type="list" name="cytoscape.alias.list">
      <att type="string" name="cytoscape.alias.list" value="100157247"/>
    </att>
    <att type="string" name="geneName" value="DNAJC5B"/>
    <att type="string" name="id" value="100157247"/>
    <graphics type="ELLIPSE" h="40.0" w="40.0" x="1951.0174560546875" y="359.6025390625" fill="#ccccff" width="1" outline="#666666" cy:nodeTransparency="1.0" cy:nodeLabelFont="SansSerif.bold-0-12" cy:nodeLabel="DNAJC5B" cy:borderLineType="solid"/>
  </node>
  <node label="100154432" id="-69">
    <att type="string" name="canonicalName" value="100154432"/>
    <att type="list" name="cytoscape.alias.list">
      <att type="string" name="cytoscape.alias.list" value="100154432"/>
    </att>
    <att type="string" name="geneName" value="RPN2"/>
    <att type="string" name="id" value="100154432"/>
    <graphics type="ELLIPSE" h="40.0" w="40.0" x="318.15240478515625" y="6167.7724609375" fill="#ccccff" width="1" outline="#666666" cy:nodeTransparency="1.0" cy:nodeLabelFont="SansSerif.bold-0-12" cy:nodeLabel="RPN2" cy:borderLineType="solid"/>
  </node>
  <node label="100513204" id="-68">
    <att type="string" name="canonicalName" value="100513204"/>
    <att type="list" name="cytoscape.alias.list">
      <att type="string" name="cytoscape.alias.list" value="100513204"/>
    </att>
    <att type="string" name="geneName" value="MOGS"/>
    <att type="string" name="id" value="100513204"/>
    <graphics type="ELLIPSE" h="40.0" w="40.0" x="373.117431640625" y="6075.0322265625" fill="#ccccff" width="1" outline="#666666" cy:nodeTransparency="1.0" cy:nodeLabelFont="SansSerif.bold-0-12" cy:nodeLabel="MOGS" cy:borderLineType="solid"/>
  </node>
  <node label="100512008" id="-67">
    <att type="string" name="canonicalName" value="100512008"/>
    <att type="list" name="cytoscape.alias.list">
      <att type="string" name="cytoscape.alias.list" value="100512008"/>
    </att>
    <att type="string" name="geneName" value="DNAJA1"/>
    <att type="string" name="id" value="100512008"/>
    <graphics type="ELLIPSE" h="40.0" w="40.0" x="1761.6873779296875" y="484.575439453125" fill="#ccccff" width="1" outline="#666666" cy:nodeTransparency="1.0" cy:nodeLabelFont="SansSerif.bold-0-12" cy:nodeLabel="DNAJA1" cy:borderLineType="solid"/>
  </node>
  <node label="100511525" id="-66">
    <att type="string" name="canonicalName" value="100511525"/>
    <att type="list" name="cytoscape.alias.list">
      <att type="string" name="cytoscape.alias.list" value="100511525"/>
    </att>
    <att type="string" name="geneName" value="STT3A"/>
    <att type="string" name="id" value="100511525"/>
    <graphics type="ELLIPSE" h="40.0" w="40.0" x="426.07452392578125" y="5980.2080078125" fill="#ccccff" width="1" outline="#666666" cy:nodeTransparency="1.0" cy:nodeLabelFont="SansSerif.bold-0-12" cy:nodeLabel="STT3A" cy:borderLineType="solid"/>
  </node>
  <node label="100499564" id="-65">
    <att type="string" name="canonicalName" value="100499564"/>
    <att type="list" name="cytoscape.alias.list">
      <att type="string" name="cytoscape.alias.list" value="100499564"/>
    </att>
    <att type="string" name="geneName" value="PDIA6"/>
    <att type="string" name="id" value="100499564"/>
    <graphics type="ELLIPSE" h="40.0" w="40.0" x="218.1524200439453" y="5995.94580078125" fill="#ccccff" width="1" outline="#666666" cy:nodeTransparency="1.0" cy:nodeLabelFont="SansSerif.bold-0-12" cy:nodeLabel="PDIA6" cy:borderLineType="solid"/>
  </node>
  <node label="100153668" id="-64">
    <att type="string" name="canonicalName" value="100153668"/>
    <att type="list" name="cytoscape.alias.list">
      <att type="string" name="cytoscape.alias.list" value="100153668"/>
    </att>
    <att type="string" name="geneName" value="RAD23B"/>
    <att type="string" name="id" value="100153668"/>
    <graphics type="ELLIPSE" h="40.0" w="40.0" x="1692.2813720703125" y="6279.349609375" fill="#ccccff" width="1" outline="#666666" cy:nodeTransparency="1.0" cy:nodeLabelFont="SansSerif.bold-0-12" cy:nodeLabel="RAD23B" cy:borderLineType="solid"/>
  </node>
  <node label="100521136" id="-63">
    <att type="string" name="canonicalName" value="100521136"/>
    <att type="list" name="cytoscape.alias.list">
      <att type="string" name="cytoscape.alias.list" value="100521136"/>
    </att>
    <att type="string" name="geneName" value="LOC100521136"/>
    <att type="string" name="id" value="100521136"/>
    <graphics type="ELLIPSE" h="40.0" w="40.0" x="1693.27685546875" y="6387.109375" fill="#ccccff" width="1" outline="#666666" cy:nodeTransparency="1.0" cy:nodeLabelFont="SansSerif.bold-0-12" cy:nodeLabel="LOC100521136" cy:borderLineType="solid"/>
  </node>
  <node label="100520774" id="-62">
    <att type="string" name="canonicalName" value="100520774"/>
    <att type="list" name="cytoscape.alias.list">
      <att type="string" name="cytoscape.alias.list" value="100520774"/>
    </att>
    <att type="string" name="geneName" value="LOC100520774"/>
    <att type="string" name="id" value="100520774"/>
    <graphics type="ELLIPSE" h="40.0" w="40.0" x="2303.417724609375" y="5171.5390625" fill="#ccccff" width="1" outline="#666666" cy:nodeTransparency="1.0" cy:nodeLabelFont="SansSerif.bold-0-12" cy:nodeLabel="LOC100520774" cy:borderLineType="solid"/>
  </node>
  <node label="100152689" id="-61">
    <att type="string" name="canonicalName" value="100152689"/>
    <att type="list" name="cytoscape.alias.list">
      <att type="string" name="cytoscape.alias.list" value="100152689"/>
    </att>
    <att type="string" name="geneName" value="SSR1"/>
    <att type="string" name="id" value="100152689"/>
    <graphics type="ELLIPSE" h="40.0" w="40.0" x="2210.270263671875" y="5111.7744140625" fill="#ccccff" width="1" outline="#666666" cy:nodeTransparency="1.0" cy:nodeLabelFont="SansSerif.bold-0-12" cy:nodeLabel="SSR1" cy:borderLineType="solid"/>
  </node>
  <node label="100151951" id="-60">
    <att type="string" name="canonicalName" value="100151951"/>
    <att type="list" name="cytoscape.alias.list">
      <att type="string" name="cytoscape.alias.list" value="100151951"/>
    </att>
    <att type="string" name="geneName" value="TUBA4A"/>
    <att type="string" name="id" value="100151951"/>
    <graphics type="ELLIPSE" h="40.0" w="40.0" x="1592.2813720703125" y="6279.349609375" fill="#ccccff" width="1" outline="#666666" cy:nodeTransparency="1.0" cy:nodeLabelFont="SansSerif.bold-0-12" cy:nodeLabel="TUBA4A" cy:borderLineType="solid"/>
  </node>
  <node label="100154566" id="-59">
    <att type="string" name="canonicalName" value="100154566"/>
    <att type="list" name="cytoscape.alias.list">
      <att type="string" name="cytoscape.alias.list" value="100154566"/>
    </att>
    <att type="string" name="geneName" value="DYNC1I2"/>
    <att type="string" name="id" value="100154566"/>
    <graphics type="ELLIPSE" h="40.0" w="40.0" x="1589.1060791015625" y="6387.0673828125" fill="#ccccff" width="1" outline="#666666" cy:nodeTransparency="1.0" cy:nodeLabelFont="SansSerif.bold-0-12" cy:nodeLabel="DYNC1I2" cy:borderLineType="solid"/>
  </node>
  <node label="100516352" id="-58">
    <att type="string" name="canonicalName" value="100516352"/>
    <att type="list" name="cytoscape.alias.list">
      <att type="string" name="cytoscape.alias.list" value="100516352"/>
    </att>
    <att type="string" name="geneName" value="LOC100516352"/>
    <att type="string" name="id" value="100516352"/>
    <graphics type="ELLIPSE" h="40.0" w="40.0" x="1072.134765625" y="5479.4306640625" fill="#ccccff" width="1" outline="#666666" cy:nodeTransparency="1.0" cy:nodeLabelFont="SansSerif.bold-0-12" cy:nodeLabel="LOC100516352" cy:borderLineType="solid"/>
  </node>
  <node label="100158003" id="-57">
    <att type="string" name="canonicalName" value="100158003"/>
    <att type="list" name="cytoscape.alias.list">
      <att type="string" name="cytoscape.alias.list" value="100158003"/>
    </att>
    <att type="string" name="geneName" value="TUBA1A"/>
    <att type="string" name="id" value="100158003"/>
    <graphics type="ELLIPSE" h="40.0" w="40.0" x="1019.98486328125" y="5381.47802734375" fill="#ccccff" width="1" outline="#666666" cy:nodeTransparency="1.0" cy:nodeLabelFont="SansSerif.bold-0-12" cy:nodeLabel="TUBA1A" cy:borderLineType="solid"/>
  </node>
  <node label="733594" id="-56">
    <att type="string" name="canonicalName" value="733594"/>
    <att type="list" name="cytoscape.alias.list">
      <att type="string" name="cytoscape.alias.list" value="733594"/>
    </att>
    <att type="string" name="geneName" value="TUBA1B"/>
    <att type="string" name="id" value="733594"/>
    <graphics type="ELLIPSE" h="40.0" w="40.0" x="1080.2666015625" y="4962.11767578125" fill="#ccccff" width="1" outline="#666666" cy:nodeTransparency="1.0" cy:nodeLabelFont="SansSerif.bold-0-12" cy:nodeLabel="TUBA1B" cy:borderLineType="solid"/>
  </node>
  <node label="100037291" id="-55">
    <att type="string" name="canonicalName" value="100037291"/>
    <att type="list" name="cytoscape.alias.list">
      <att type="string" name="cytoscape.alias.list" value="100037291"/>
    </att>
    <att type="string" name="geneName" value="DYNC1H1"/>
    <att type="string" name="id" value="100037291"/>
    <graphics type="ELLIPSE" h="40.0" w="40.0" x="1053.7606201171875" y="5054.95849609375" fill="#ccccff" width="1" outline="#666666" cy:nodeTransparency="1.0" cy:nodeLabelFont="SansSerif.bold-0-12" cy:nodeLabel="DYNC1H1" cy:borderLineType="solid"/>
  </node>
  <node label="100624195" id="-54">
    <att type="string" name="canonicalName" value="100624195"/>
    <att type="list" name="cytoscape.alias.list">
      <att type="string" name="cytoscape.alias.list" value="100624195"/>
    </att>
    <att type="string" name="geneName" value="LOC100624195"/>
[truncated: 986,723 more chars]
